# Supplementary material for: Novel dinuclear NHC–gold(i)-amido complexes and their application in energy transfer photocatalysis
Source: Royal Society of Chemistry journal article supplement (doi:10.1039/d3cy00716b), 2023-01-01
Supplement: d3cy00716b1.pdf [file d3cy00716b1.pdf]

## SUPPORTING INFORMATION

---

### **Novel Dinuclear NHC-Gold(I)-Amido Complexes and Their Application in Energy Transfer Photocatalysis**

Xinyuan Ma,<sup>a</sup> Vladislav A. Voloshkin,<sup>†a</sup> Ekaterina A. Martynova,<sup>†a</sup> Marek Beliš,<sup>a</sup> Min Peng,<sup>a</sup> Marco Villa,<sup>b</sup>  
Nikolaos V. Tzouras,<sup>a</sup> Wim Janssens,<sup>a</sup> Kristof Van Hecke,<sup>a</sup> Paola Ceroni,<sup>b</sup> and Steven P. Nolan <sup>\*a</sup>

## SUPPORTING INFORMATION

---

### Table of Contents

|                                                                                              |     |
|----------------------------------------------------------------------------------------------|-----|
| General Information .....                                                                    | S3  |
| General Procedure for Bis-imidazolium Salts .....                                            | S5  |
| General Procedure for Dinuclear Gold(I) Complexes [(L)(AuX) <sub>2</sub> ] .....             | S7  |
| General Procedure for Dinuclear Gold(I) Amido Complexes [(L){Au(amido)} <sub>2</sub> ] ..... | S10 |
| Photocatalytic Experiments .....                                                             | S15 |
| General procedure for the [2+2] cycloaddition of indole.....                                 | S16 |
| General procedure for the cyclization of indole 6 .....                                      | S17 |
| Absorption and PL spectroscopy .....                                                         | S19 |
| Molecular Structures of Complexes .....                                                      | S30 |
| NMR spectra .....                                                                            | S33 |
| References .....                                                                             | S59 |

## SUPPORTING INFORMATION

---

### General Information

Except for special instructions, all manipulations were carried out under air, in scintillation vials. Solvents for photocatalytic experiments were degassed with Ar and stored over molecular sieves. Other solvents and reagents were used as received without any further purification or distillation. Syringe microfilters were purchased from CarlRoth. N-Aryl imidazoles and N-(1-methyl)-1*H*-imidazole compounds were prepared according to literature procedures.<sup>1</sup> 3,3'-(hexane-1,6-diyl)bis(1-(2,6-diisopropylphenyl)-1*H*-imidazolium) chloride [ $\text{IPr}^{\text{hexane-1,6-diyl}}\cdot 2\text{HCl}$ ] and the corresponding [ $\text{IPr}^{\text{hexane-1,6-diyl}}(\text{AuCl})_2$ ] were prepared according to literature procedures.<sup>2</sup> <sup>1</sup>H NMR and <sup>13</sup>C NMR were recorded in CDCl<sub>3</sub> or DMSO-*d*<sub>6</sub> at room temperature on Bruker spectrometer (300 MHz or 400 MHz). Chemical shifts (ppm) are referenced to the residual solvent peak. Coupling constants (*J*) are given in hertz. Abbreviations used in the designation of the signals: s = singlet, br s = broad singlet, d = doublet, br d = broad doublet, dd = doublet of doublets, ddd = doublet of doublets of doublets, m = multiplet, td = triplet of doublets, tt = triplet of triplets, q = quadruplet, qt = quadruplet of triplets, hept = heptet.

The samples for spectroscopy were prepared in argon filled glovebox using spectroscopy grade THF as a solvent. Absorption spectra were recorded on Perkin Elmer LAMBDA™ 950 spectrophotometer. Luminescence spectra were recorded in quartz cuvettes with a screw cap on FLS 920 Edinburgh Photoluminescence Spectrometer, equipped with 450W Xenon lamp as an excitation source and PMT detector. The excitation and emission spectra were collected at right angles to the excitation source and were corrected using the standard corrections supplied by the manufacturer for the spectral power of the excitation source and the sensitivity of the detector.

Photophysical analyses in deaerated DMSO were carried out at 298 K. Degassed solutions are obtained by means of repeated pump-freeze-thaw cycles (ca.  $4 \times 10^{-6}$  mbar) in sealed quartz cuvettes. Emission quantum yields were measured following the method of Demas and

## SUPPORTING INFORMATION

---

Crosby<sup>3</sup> (standard used:  $[\text{Ru}(\text{bpy})_3]^{2+}$  in air-equilibrated aqueous solution  $\Phi = 0.04057$ )<sup>4</sup> Lifetimes longer 10  $\mu\text{s}$  were measured by the above mentioned Edinburgh FS5 spectrofluorimeter. The estimated experimental errors are 2 nm on the band maximum, 5% luminescence lifetime and 15% for emission quantum yields.

Photocatalytic experiments were performed in EvoluChem™ PhotoRedOx Box by HepatoChem, equipped with an EvoluChem™ LED. 365PF (365 nm, 18 W, 9 mW/cm) lamp was used.

## SUPPORTING INFORMATION

### General Procedure for Bis-imidazolium Salts

The salts were synthesized according to the modified procedure reported in the literature.<sup>2</sup> A 50 mL flask tube charged with stirring bar, imidazole (2 mmol, 2 equiv.) and aryl halide (1 mmol, 1 equiv.) was heated to 100°C in 12mL dioxane overnight. A white solid was produced in the reaction mixture over time. The reaction mixture was cooled down to room temperature and then precipitate was filtered, washed with ethyl acetate (5 mL x 3) and dried under vacuum.

#### 3,3-Bis[(2,6-diisopropylphenyl)-1,1-*o*-phenylenedimethylenebis(imidazolium) dibromide **1a**

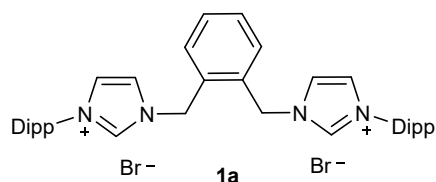

<sup>1</sup>H NMR (300 MHz, CDCl<sub>3</sub>) δ 10.56 (s, 2H, NCHN), 8.38 (s, 2H, CH=CH), 7.53 (t, *J* = 7.8 Hz, 2H, CH, Dipp), 7.43 – 7.37 (m, 2H, CH, *o*-xylene), 7.34 (dd, *J* = 6.6, 2.7 Hz, 2H, CH, *o*-xylene), 7.30 (d, *J* = 7.9 Hz, 4H, CH, Dipp), 7.20 (s, 2H, CH=CH), 6.53 (s, 4H, CH<sub>2</sub>), 2.44 – 2.26 (m, 4H, CH(CH<sub>3</sub>)<sub>2</sub>), 1.23 (d, *J* = 6.8 Hz, 12H, CH(CH<sub>3</sub>)<sub>2</sub>), 1.18 (d, *J* = 6.8 Hz, 12H, CH(CH<sub>3</sub>)<sub>2</sub>). <sup>13</sup>C NMR (75 MHz, CDCl<sub>3</sub>) δ 145.5 (C(Pr), Dipp), 138.3 (NCHN), 132.8 (CH<sub>2</sub>C, *o*-xylene), 132.1 (CH, Dipp), 130.3 (CN, Dipp), 130.0 (CH, *o*-xylene), 129.1 (CH, *o*-xylene), 124.8 (CH, Dipp), 124.7 (CH=CH), 124.4 (CH=CH), 50.4 (CH<sub>2</sub>), 28.9 (CH(CH<sub>3</sub>)<sub>2</sub>), 24.7 (CH(CH<sub>3</sub>)<sub>2</sub>), 24.2 (CH(CH<sub>3</sub>)<sub>2</sub>). Analytical data obtained are in agreement with reported values.<sup>5</sup>

#### 3,3-Bis[(2,6-diisopropylphenyl)-1,1-*m*-phenylenedimethylenebis(imidazolium) dibromide **1b**

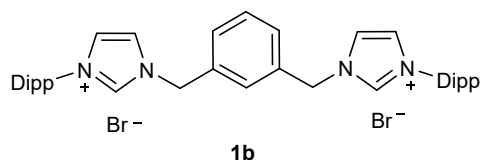

<sup>1</sup>H NMR (400 MHz, DMSO-d<sub>6</sub>) δ 9.83 (s, 2H, NCHN), 8.18 (d, *J* = 15.8 Hz, 4H, CH=CH), 7.74 (s, 1H, CH, *m*-xylene), 7.63 (t, *J* = 7.8 Hz, 2H, CH, Mes), 7.60 – 7.54 (m, 1H, CH, *m*-xylene), 7.49 – 7.43 (m, 6H, CH, Mes; CH, *m*-xylene), 5.63 (s, 4H, CH<sub>2</sub>), 2.22 (dt, *J* = 13.5, 6.7 Hz, 4H, CH(CH<sub>3</sub>)<sub>2</sub>), 1.12 (t, *J* = 7.3 Hz, 24H, CH(CH<sub>3</sub>)<sub>2</sub>). <sup>13</sup>C NMR (101 MHz, DMSO) δ 145.0 (C(CH<sub>3</sub>)<sub>2</sub>, Dipp), 138.0 (NCHN), 135.6 (CCH, *m*-xylene), 131.6 (CH, Dipp), 130.5 (CN, Dipp), 130.1 (CH, *m*-xylene), 128.7 (CH, *m*-xylene), 128.4 (CH, *m*-xylene), 125.4 (CH=CH), 124.5 (CH, Dipp), 123.6 (CH=CH), 52.2 (CH<sub>2</sub>), 28.1

## SUPPORTING INFORMATION

( $\underline{\text{C}}\text{H}(\underline{\text{C}}\text{H}_3)_2$ ), 23.8 ( $\underline{\text{C}}\text{H}(\underline{\text{C}}\text{H}_3)_2$ ), 23.7 ( $\underline{\text{C}}\text{H}(\underline{\text{C}}\text{H}_3)_2$ ). Analytical data obtained are in agreement with reported values.<sup>6</sup>

### 3,3-Bis[(2,6-diisopropylphenyl)-1,1-*p*-phenylenedimethylenebis(imidazolium) dibromide **1c**

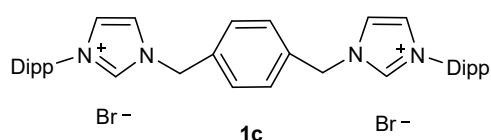

<sup>1</sup>H NMR (300 MHz, CD<sub>2</sub>Cl<sub>2</sub>) δ 10.82 (s, 2H, NCHN), 8.00 (s, 2H), 7.72 (s, 4H), 7.57 (t, *J* = 7.8 Hz, 2H, CH, Dipp), 7.34 (d, *J* = 7.8 Hz, 4H, CH, Dipp), 7.21 (t, *J* = 1.6 Hz, 2H), 6.10 (s, 4H, CH<sub>2</sub>), 2.28 (dt, *J* = 13.6, 6.8 Hz, 4H, CH(CH<sub>3</sub>)<sub>2</sub>), 1.21 (d, *J* = 6.8 Hz, 12H, CH(CH<sub>3</sub>)<sub>2</sub>), 1.15 (d, *J* = 6.8 Hz, 12H, CH(CH<sub>3</sub>)<sub>2</sub>). <sup>13</sup>C NMR (75 MHz, CD<sub>2</sub>Cl<sub>2</sub>) δ 146.0, 139.0, 135.6, 132.5, 130.8, 130.3, 125.3, 125.0, 123.7, 53.1(CH<sub>2</sub>) 29.3 (CH(CH<sub>3</sub>)<sub>2</sub>), 24.8 (CH(CH<sub>3</sub>)<sub>2</sub>), 24.3 (CH(CH<sub>3</sub>)<sub>2</sub>). Analytical data obtained are in agreement with reported values.<sup>7</sup>

### 3,3'-Bis[1-mesityl-1*H*-imidazolium]-1,1-*o*-phenylenedimethylenebis(imidazolium) dibromide **1d**

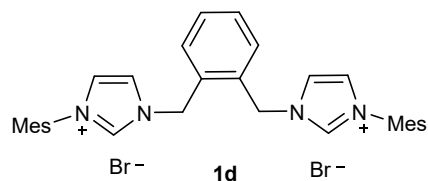

<sup>1</sup>H NMR (300 MHz, CDCl<sub>3</sub>) δ 10.36 (t, *J* = 1.5 Hz, 2H, NCHN), 8.15 (t, *J* = 1.7 Hz, 2H, CH=CH), 7.46 – 7.35 (m, 4H, CH, *o*-xylene), 7.18 (t, *J* = 1.8 Hz, 2H, CH=CH), 7.00 (s, 4H, CH, Mes), 6.45 (s, 4H, CH<sub>2</sub>), 2.34 (s, 6H, CH<sub>3</sub>, Mes), 2.12 (s, 12H, CH<sub>3</sub>, Mes). <sup>13</sup>C NMR (75 MHz, CDCl<sub>3</sub>) δ 141.6, 137.7, 134.4, 132.6, 130.8, 130.3, 130.1, 129.7, 124.3, 123.5, 50.5, 21.2, 18.0. Analytical data obtained are in agreement with reported values.<sup>7</sup>

### 3,3'-Bis[1-mesityl-1*H*-imidazolium]-1,1-*m*-phenylenedimethylenebis(imidazolium) dibromide **1e**

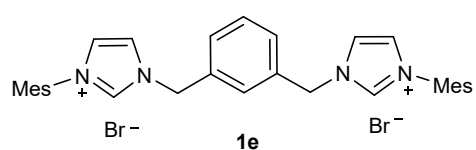

<sup>1</sup>H NMR (300 MHz, CDCl<sub>3</sub>) δ 10.48 (s, 2H, NCHN), 8.68 (t, *J* = 1.5 Hz, 2H, CH=CH), 8.50 (s, 1H, CH, *m*-xylene), 7.70 (dd, *J* = 7.7, 1.4 Hz, 2H, CH, *m*-xylene), 7.14 – 7.05 (m, 3H, CH=CH; CH, *m*-xylene), 6.96 (s, 4H, CH, Mes), 5.91 (s, 4H, CH<sub>2</sub>), 2.31 (s, 6H, CH<sub>3</sub>), 2.01 (s, 12H, CH<sub>3</sub>). <sup>13</sup>C NMR (75 MHz, CDCl<sub>3</sub>) δ 141.4, 137.4, 134.9, 134.2, 131.6, 130.8, 130.1, 130.0, 129.9, 124.7, 123.4, 52.5, 21.2, 17.8. Anal. Calcd for C<sub>32</sub>H<sub>36</sub>Br<sub>2</sub>N<sub>4</sub>: C, 60.39; H, 5.7; N, 8.8; found: C, 59.61; H, 5.91; N, 8.62.

### 3,3'-Bis[1-mesityl-1*H*-imidazolium]-1,1-*p*-phenylenedimethylenebis(imidazolium) dibromide **1f**

## SUPPORTING INFORMATION

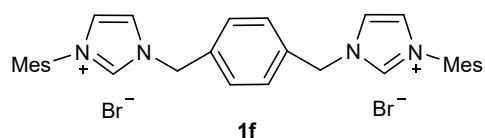

$^1\text{H}$  NMR (400 MHz, DMSO- $d_6$ )  $\delta$  9.65 (t,  $J$  = 1.5 Hz, 2H, NCHN), 8.09 (t,  $J$  = 1.7 Hz, 2H, CH=CH), 7.97 (t,  $J$  = 1.8 Hz, 2H, CH=CH), 7.55 (s, 4H, CH, *p*-xylene), 7.15 (s, 4H, CH, Mes), 5.58 (s, 4H, CH<sub>2</sub>), 2.33 (s, 6H, CH<sub>3</sub>), 2.00 (s, 12H, CH<sub>3</sub>).  $^{13}\text{C}$  NMR (101 MHz, DMSO)  $\delta$  140.3, 137.7, 135.4, 134.2, 131.1, 129.3, 128.9, 124.4, 123.2, 51.9, 20.6, 16.9. Analytical data obtained are in agreement with reported values.<sup>7</sup>

3,3'-Bis[1-methyl-1*H*-imidazolium]-1,1'-*o*-phenylenedimethylenebis(imidazolium) dibromide **1g**

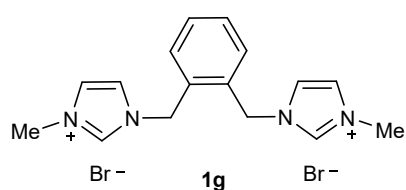

$^1\text{H}$  NMR (300 MHz, DMSO- $d_6$ )  $\delta$  9.25 (s, 2H, NCHN), 7.78 (dt,  $J$  = 5.6, 1.7 Hz, 4H, CH=CH), 7.48 (dd,  $J$  = 5.7, 3.4 Hz, 2H, CH, *o*-xylene), 7.33 (dd,  $J$  = 5.6, 3.5 Hz, 2H, CH, *o*-xylene), 5.67 (s, 4H, CH<sub>2</sub>), 3.88 (s, 6H, CH<sub>3</sub>).  $^{13}\text{C}$  NMR (75 MHz, DMSO)  $\delta$  136.9, 132.9, 129.7, 129.6, 124.0, 122.5, 49.0, 36.0. Analytical data obtained are in agreement with reported values.<sup>8</sup>

### General Procedure for Dinuclear Gold(I) Complexes [(L)(AuX)<sub>2</sub>]

A vial was charged, under air, with the corresponding dinuclear NHC·2HBr (0.5 mmol, 1 equiv.), [Au(DMS)Cl] (2 equiv.), K<sub>2</sub>CO<sub>3</sub> (6 equiv.) and acetone (0.2 M). The vial was closed with a screw cap, and reaction mixture was stirred at 60°C for 5-12 hours. After this time, the mixture was filtered through a pad of silica and the silica was washed with DCM or DCM/MeOH. The filtrate was then concentrated and pentane was added to precipitate the complex, affording a colorless solid after filtration. Then the compound was dried under vacuum overnight.

[(IPr)<sup>*o*-xylene</sup>(AuBr)<sub>2</sub>] **2a**

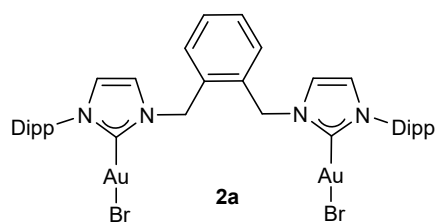

Colorless solid (506.1mg, 91%).  $^1\text{H}$  NMR (300 MHz, CDCl<sub>3</sub>)  $\delta$  7.51 – 7.45 (m, 2H, CH, Dipp), 7.42 (dd,  $J$  = 5.7, 3.3 Hz, 2H, CH, *o*-xylene), 7.29 – 7.25 (m, 4H, CH, Dipp), 7.24 (d,  $J$  = 1.9 Hz, 2H, CH=CH), 7.07 (d,  $J$  = 1.9 Hz, 2H, CH=CH), 7.04 (dd,  $J$  = 5.6, 3.4 Hz, 2H, CH, *o*-xylene), 5.61 (s, 4H, CH<sub>2</sub>), 2.51 (dt,

## SUPPORTING INFORMATION

$J = 13.7, 6.8$  Hz, 4H,  $\text{CH}(\text{CH}_3)_2$ ), 1.30 (d,  $J = 6.9$  Hz, 12H,  $\text{CH}(\text{CH}_3)_2$ ), 1.17 (d,  $J = 6.9$  Hz, 12H,  $\text{CH}(\text{CH}_3)_2$ ).  $^{13}\text{C}$  NMR (101 MHz,  $\text{CDCl}_3$ )  $\delta$  177.6 ( $\text{N}\underline{\text{C}}\text{N}$ ), 145.8 ( $\text{C}(\textit{i}\text{Pr})$ , Dipp), 134.0 ( $\text{CH}_2\underline{\text{C}}$ , *o*-xylene), 133.3 ( $\text{C}\underline{\text{N}}$ , Dipp), 130.9, 129.6 ( $\text{C}\underline{\text{H}}$ , *o*-xylene), 128.3 ( $\text{C}\underline{\text{H}}$ , *o*-xylene), 124.8, 124.4 ( $\text{C}\underline{\text{H}}$ , Dipp), 121.1, 52.4 ( $\text{C}\underline{\text{H}}_2$ ), 28.7 ( $\text{CH}(\text{CH}_3)_2$ ), 24.6 ( $\text{CH}(\text{CH}_3)_2$ ), 24.5 ( $\text{CH}(\text{CH}_3)_2$ ). HRMS calculated for  $\text{C}_{38}\text{H}_{46}\text{N}_4\text{Au}_2\text{Br}$  [ $\text{M} - \text{Br}$ ] $^+$ : 1031.2237; found : 1031.2241. Anal. Calcd for  $\text{C}_{38}\text{H}_{46}\text{Au}_2\text{Br}_2\text{N}_4$ : C, 41.02; H, 4.17; N, 5.04; found: C, 41.55; H, 3.89; N, 5.09.

### $[(\text{IPr})^{m\text{-xylene}}(\text{AuBr})_2]$ **2b**

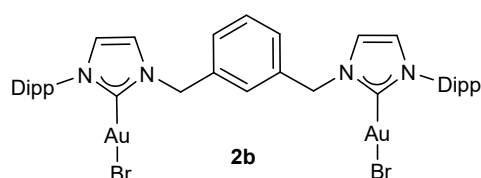

Colorless solid (445.0mg, 80%).  $^1\text{H}$  NMR (300 MHz,  $\text{DMSO-d}_6$ )  $\delta$  7.79 (d,  $J = 1.9$  Hz, 2H,  $\text{CH}=\underline{\text{C}}\text{H}$ ), 7.72 (d,  $J = 1.8$  Hz, 2H,  $\text{C}\underline{\text{H}}=\text{CH}$ ), 7.57 – 7.46 (m, 3H,  $\text{C}\underline{\text{H}}$ , Dipp;  $\text{C}\underline{\text{H}}$ , *m*-xylene), 7.45 (s, 1H,  $\text{C}\underline{\text{H}}$ , *m*-xylene), 7.37 (d,  $J = 7.7$  Hz,

4H,  $\text{C}\underline{\text{H}}$ , Dipp), 7.24 (d,  $J = 7.7$  Hz, 2H,  $\text{C}\underline{\text{H}}$ , *m*-xylene), 5.53 (s, 4H,  $\text{C}\underline{\text{H}}_2$ ), 2.35 (dt,  $J = 13.6, 6.7$  Hz, 4H,  $\text{CH}(\text{CH}_3)_2$ ), 1.22 (d,  $J = 6.8$  Hz, 12H,  $\text{CH}(\text{CH}_3)_2$ ), 1.12 (d,  $J = 6.8$  Hz, 12H,  $\text{CH}(\text{CH}_3)_2$ ).  $^{13}\text{C}$  NMR (75 MHz,  $\text{DMSO}$ )  $\delta$  174.6 ( $\text{N}\underline{\text{C}}\text{N}$ ), 145.3 ( $\text{C}(\textit{i}\text{Pr})$ ), 137.3 ( $\text{CH}_2\underline{\text{C}}$ , *m*-xylene), 134.2 ( $\text{C}\underline{\text{N}}$ , Dipp), 130.3, 129.5, 126.6, 126.4, 124.7, 123.9 ( $\text{C}\underline{\text{H}}$ , Dipp), 122.1, 53.4 ( $\text{C}\underline{\text{H}}_2$ ), 28.0 ( $\text{CH}(\text{CH}_3)_2$ ), 23.9 ( $\text{CH}(\text{CH}_3)_2$ ), 23.7 ( $\text{CH}(\text{CH}_3)_2$ ). Anal. Calcd for  $\text{C}_{38}\text{H}_{46}\text{Au}_2\text{Br}_2\text{N}_4$ : C, 41.02; H, 4.17; N, 5.04; found: C, 41.04; H, 4.55; N, 5.52.

### $[(\text{IMes})^{o\text{-xylene}}(\text{AuBr})_2]$ **2d**

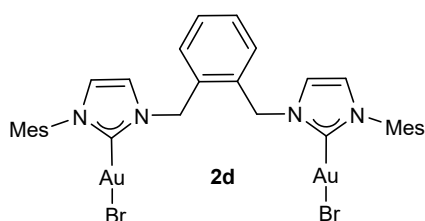

Colorless solid (426.78mg, 83%).  $^1\text{H}$  NMR (400 MHz,  $\text{CDCl}_3$ )  $\delta$  7.40 (dd,  $J = 5.7, 3.3$  Hz, 2H,  $\text{C}\underline{\text{H}}$ , *o*-xylene), 7.22 (d,  $J = 2.0$  Hz, 2H,  $\text{C}\underline{\text{H}}=\text{CH}$ ), 7.04 – 7.00 (m, 4H,  $\text{C}\underline{\text{H}}$ , *o*-xylene;  $\text{C}\underline{\text{H}}=\text{CH}$ ), 6.97 (d,  $J = 0.4$  Hz, 4H,  $\text{C}\underline{\text{H}}$ , Mes), 5.58 (s, 4H,  $\text{C}\underline{\text{H}}_2$ ), 2.33 (s, 6H,  $\text{C}\underline{\text{H}}_3$ ), 2.08 (s, 12H,  $\text{C}\underline{\text{H}}_3$ ).  $^{13}\text{C}$  NMR (101 MHz,  $\text{CDCl}_3$ )  $\delta$

176.6 ( $\text{N}\underline{\text{C}}\text{N}$ ), 140.0 ( $\text{CH}_3\underline{\text{C}}$ , Mes), 134.8 ( $\text{CH}_3\underline{\text{C}}$ , Mes), 134.6, 133.4, 129.7 ( $\text{C}\underline{\text{H}}$ , Mes), 129.6 ( $\text{C}\underline{\text{H}}$ , *o*-xylene), 128.3 ( $\text{C}\underline{\text{H}}$ , *o*-xylene), 123.6 ( $\text{C}\underline{\text{H}}=\text{CH}$ ), 121.4 ( $\text{C}\underline{\text{H}}=\text{CH}$ ), 52.4 ( $\text{C}\underline{\text{H}}_2$ ), 21.3 ( $\text{C}\underline{\text{H}}_3$ ), 18.3 ( $\text{C}\underline{\text{H}}_3$ ). HRMS calculated for  $\text{C}_{32}\text{H}_{34}\text{N}_4\text{Au}_2\text{Br}$  [ $\text{M} - \text{Br}$ ] $^+$ : 947.1298; found : 947.1294.

### $[(\text{IMes})^{m\text{-xylene}}(\text{AuBr})_2]$ **2e**



## SUPPORTING INFORMATION

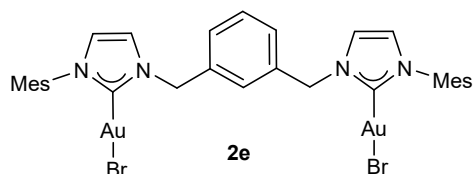

Colorless solid (390.78mg, 76%).  $^1\text{H}$  NMR (300 MHz,  $\text{CD}_2\text{Cl}_2$ )  $\delta$  7.49 – 7.42 (m, 2H,  $\text{CH}$ , *m*-xylene), 7.38 – 7.32 (m, 2H,  $\text{CH}$ , *m*-xylene), 7.27 (d,  $J$  = 1.9 Hz, 2H,  $\text{CH}=\text{CH}$ ), 7.04 (s, 4H,  $\text{CH}$ , Mes), 6.97 (d,  $J$  = 2.0 Hz, 2H,  $\text{CH}=\text{CH}$ ), 5.51 (s, 4H,  $\text{CH}_2$ ), 2.37 (s, 6H,  $\text{CH}_3$ ), 2.05 (s, 12H,  $\text{CH}_3$ ).  $^{13}\text{C}$  NMR (75 MHz,  $\text{CD}_2\text{Cl}_2$ )  $\delta$  176.4 (NCN), 140.5 ( $\text{CH}_3$ C, Mes), 137.2 ( $\text{CH}_2$ C, *m*-xylene), 135.5 ( $\text{CH}_3$ C, Mes), 135.4 (CN, Mes), 130.6, 129.9 (CH, Mes), 128.3, 128.0, 123.4, 121.8, 55.2 (C $\text{H}_2$ ), 21.5 (C $\text{H}_3$ ), 18.2 (C $\text{H}_3$ ). HRMS calculated for  $\text{C}_{33}\text{H}_{34}\text{N}_5\text{Au}_2$  [ $\text{M}-2\text{Br}+\text{CN}^+$ ] $^+$ : 894.2145; found : 894.2144.

### [(IMes)<sup>*p*-xylene</sup>(AuBr)<sub>2</sub>] **2f**

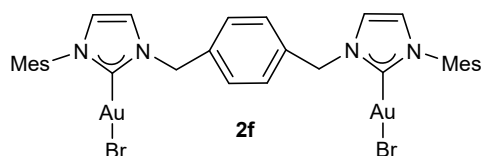

Colorless solid (287.95mg, 56%).  $^1\text{H}$  NMR (300 MHz,  $\text{DMSO}-d_6$ )  $\delta$  7.82 (d,  $J$  = 1.9 Hz, 2H,  $\text{CH}=\text{CH}$ ), 7.54 (d,  $J$  = 1.9 Hz, 2H,  $\text{CH}=\text{CH}$ ), 7.40 (s, 4H, CH, *p*-xylene), 7.08 (s, 4H, CH, Mes), 5.49 (s, 4H,  $\text{CH}_2$ ), 2.32 (s, 6H,  $\text{CH}_3$ ), 1.97 (s, 12H,  $\text{CH}_3$ ).  $^{13}\text{C}$  NMR (75 MHz,  $\text{DMSO}$ )  $\delta$  173.4 (NCN), 138.9 ( $\text{CH}_3$ C, Mes), 136.6 ( $\text{CH}_2$ C, *p*-xylene), 134.9, 134.5, 129.0, 127.6, 123.5, 122.4, 53.2 (C $\text{H}_2$ ), 20.6 (C $\text{H}_3$ ), 17.3 (C $\text{H}_3$ ). Anal. Calcd for  $\text{C}_{32}\text{H}_{34}\text{Au}_2\text{Br}_2\text{N}_4$ : C, 37.37; H, 3.33; N, 5.45; found: C, 37.48; H, 3.09; N, 5.29.

### [(IMe)<sup>*o*-xylene</sup>(AuBr)<sub>2</sub>] **2g**

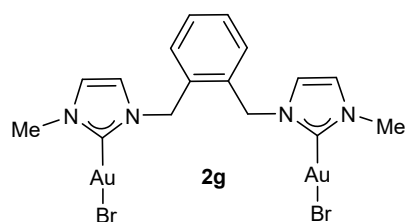

Colorless solid (250.13mg, 61%).  $^1\text{H}$  NMR (300 MHz,  $\text{DMSO}-d_6$ )  $\delta$  7.51 (d,  $J$  = 1.9 Hz, 2H,  $\text{CH}=\text{CH}$ ), 7.39 – 7.31 (m, 4H, CH, *o*-xylene;  $\text{CH}=\text{CH}$ ), 7.07 (dd,  $J$  = 5.6, 3.5 Hz, 2H,  $\text{CH}=\text{CH}$ ), 5.49 (s, 4H,  $\text{CH}_2$ ), 3.82 (s, 6H,  $\text{CH}_3$ ).  $^{13}\text{C}$  NMR (75 MHz,  $\text{DMSO}$ )  $\delta$  173.0 (NCN), 134.1 ( $\text{CH}_2$ C, *o*-xylene), 128.6 (CH, *o*-xylene), 128.4 (CH, *o*-xylene), 123.4 (C $\text{H}=\text{CH}$ ), 121.4 123.4 (C $\text{H}=\text{CH}$ ), 50.7 123.4 (C $\text{H}_2$ ), 37.8 (C $\text{H}_3$ ). HRMS calculated for  $\text{C}_{16}\text{H}_{18}\text{N}_4\text{Au}_2\text{Br}$  [ $\text{M} - \text{Br}$ ] $^+$ : 739.0046; found: 739.0115.

## General Procedure for Dinuclear Gold(I) Amido Complexes [(L){Au(amido)}<sub>2</sub>]

## SUPPORTING INFORMATION

---

**Path A (Carbazole as the ligand):** A 4 mL vial equipped with a screw cap and a stirring bar was charged, under air, with the corresponding [bisNHC(AuBr)<sub>2</sub>] (0.1 mmol, 1 equiv.), carbazole (0.2 mmol, 2 equiv., 33.4 mg), K<sub>2</sub>CO<sub>3</sub> (0.4 mmol, 4 equiv., 55.3 mg) and acetone (1 mL). Reaction mixture was stirred at 60°C for 6-22 hours. The solvent was removed under vacuum and purification of the product was carried out by filtration through microfilter with THF (2 mL x 2) or DCM/MeOH (v:v = 10:1, 2 mL x 2). The solvent was then concentrated and pentane was added to precipitate the complex, affording a colorless solid. After filtration, the compound was dried under vacuum overnight.

**Path B (Other amines as the ligand):** A 4 mL vial equipped with a screw cap and a stirring bar was charged, under air, with the corresponding [(IPr)<sup>o-xylene</sup>(AuBr)<sub>2</sub>] (0.1 mmol, 1 equiv., 111.2mg), amine (0.2 mmol, 2 equiv.), K<sub>2</sub>CO<sub>3</sub> (0.6 mmol, 6 equiv., 83 mg) and EtOH (1 mL). The mixture was stirred at 40°C for 12 hours. The solvent was removed under vacuum and purification of the product was carried out by filtration through an alumina plug with THF (2 mL x 2). The solvent was then concentrated and pentane was added to precipitate the complex, affording a colorless solid. Then the compound was dried under vacuum overnight.

### One-pot synthesis of binuclear CMA complex

A vial was charged, under air, with 72.1 mg of [(IPr)<sup>o-xylene</sup>·2HCl] (0.1 mmol, 1 equiv.), 82.9 mg of K<sub>2</sub>CO<sub>3</sub> (0.6 mmol, 6 equiv.), 58.9 mg of Au(DMS)Cl (0.2 mmol, 2 equiv.), and the solids were suspended in acetone (1 mL). The reaction mixture was stirred at 60 °C for 5 hours. Then, the reaction was cooled to room temperature and 33.4 mg of carbazole (0.2 mmol, 2 equiv.), 55.3 mg of K<sub>2</sub>CO<sub>3</sub> (0.4 mmol, 4 equiv.) and 1 mL of acetone were added. The reaction mixture was stirred at 60 °C for another 12h. After this time the solvent was removed under vacuum and the residue was taken up in THF (2 mL) and filtered through basic alumina which was washed using THF (1 mL x 3). The filtrate was concentrated to dryness, and the resulting solid was washed with diethyl ether and dried, affording the desired complex [(IPr)<sup>o-xylene</sup>{Au(Cbz)<sub>2</sub>}]<sub>2</sub> **3a** as a colorless solid in 76% yield (97.7 mg).

[(IPr)<sup>o-xylene</sup>{Au(Cbz)<sub>2</sub>}] **3a**

## SUPPORTING INFORMATION

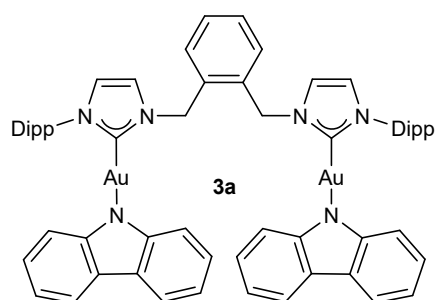

Colorless solid (106.5mg, 83%).  $^1\text{H}$  NMR (400 MHz,  $\text{CDCl}_3$ )  $\delta$  8.01 (d,  $J = 7.5$  Hz, 4H,  $\text{CH}$ , Cbz), 7.57 – 7.50 (m, 4H,  $\text{CH}$ , Dipp and  $\text{CH}$ , *o*-xylene), 7.30 (d,  $J = 7.8$  Hz, 4H,  $\text{CH}$ , Dipp), 7.22 (dd,  $J = 5.6, 3.4$  Hz, 2H,  $\text{CH}$ , *o*-xylene), 7.11 (ddd,  $J = 8.1, 7.0, 1.2$  Hz, 4H,  $\text{CH}$ , Cbz), 7.02 (d,  $J = 8.0$  Hz, 4H,  $\text{CH}$ , Cbz), 6.98 (d,  $J = 1.9$  Hz, 2H,  $\text{CH}=\text{CH}$ ), 6.98 – 6.93 (m, 4H,  $\text{CH}$ , Cbz), 6.87 (d,  $J = 1.9$  Hz, 2H,  $\text{CH}=\text{CH}$ ), 5.74 (s, 4H,  $\text{CH}_2$ ), 2.61 – 2.47 (m, 4H,  $\text{CH}(\text{CH}_3)_2$ ), 1.34 (d,  $J = 6.9$  Hz, 12H,  $\text{CH}(\text{CH}_3)_2$ ), 1.10 (d,  $J = 6.9$  Hz, 12H,  $\text{CH}(\text{CH}_3)_2$ ).  $^{13}\text{C}$  NMR (101 MHz,  $\text{CDCl}_3$ )  $\delta$  177.8 ( $\text{NCN}$ ), 149.5 ( $\text{CHCN}$ , Cbz), 146.1 ( $\text{C}(\text{Pr})$ ), 134.3 ( $\text{CH}_2\text{C}$ , *o*-xylene), 133.9 ( $\text{CN}$ , Dipp), 130.8, 129.6 ( $\text{CH}$ , *o*-xylene), 128.6 ( $\text{CH}$ , *o*-xylene), 124.4 ( $\text{CH}$ , Dipp), 124.0 ( $\text{CCH}$ , Cbz), 123.5 ( $\text{CH}$ , Cbz), 121.3, 119.7 ( $\text{CH}$ , Cbz), 116.1 ( $\text{CH}$ , Cbz), 113.6 ( $\text{CH}$ , Cbz), 52.7 ( $\text{CH}_2$ ), 28.9 ( $\text{CHCH}_3$ ), 24.6 ( $\text{CHCH}_3$ ), 24.3 ( $\text{CHCH}_3$ ). Anal. Calcd for  $\text{C}_{62}\text{H}_{62}\text{Au}_2\text{N}_6$ : C, 57.95; H, 4.86; N, 6.54; found: C, 57.54; H, 4.61; N, 6.17.

### $[(\text{IPr})^{m\text{-xylene}}\{\text{Au}(\text{Cbz})\}_2]$ **3b**

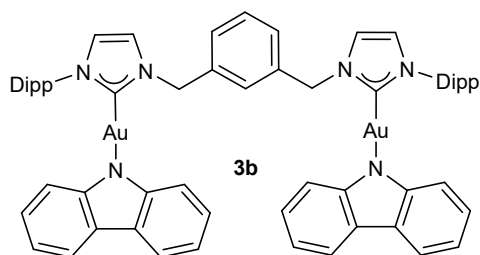

Colorless solid (91.3mg, 71%).  $^1\text{H}$  NMR (300 MHz,  $\text{DMSO-}d_6$ )  $\delta$  7.92 (d,  $J = 7.5$  Hz, 4H,  $\text{CH}$ , Cbz), 7.76 (s, 4H,  $\text{CH}=\text{CH}$ ), 7.68 – 7.60 (m, 3H), 7.58 – 7.50 (m, 2H), 7.45 (d,  $J = 7.8$  Hz, 4H,  $\text{CH}$ , Cbz), 7.41 (s, 1H,  $\text{CH}$ , *m*-xylene), 7.10 – 7.03 (m, 4H,  $\text{CH}$ , Cbz), 6.99 (d,  $J = 7.9$  Hz, 4H,  $\text{CH}$ , Dipp), 6.90 – 6.79 (m, 4H,  $\text{CH}$ , Cbz), 5.69 (s, 4H,  $\text{CH}_2$ ), 2.45 (m, 4H,  $\text{CH}(\text{CH}_3)_2$ ), 1.26 (d,  $J = 6.8$  Hz, 12H,  $\text{CH}(\text{CH}_3)_2$ ), 1.16 (d,  $J = 6.9$  Hz, 12H,  $\text{CH}(\text{CH}_3)_2$ ).  $^{13}\text{C}$  NMR (75 MHz,  $\text{DMSO}$ )  $\delta$  174.4 ( $\text{NCN}$ ), 148.7 ( $\text{CHCN}$ , Cbz), 145.7 ( $\text{C}(\text{Pr})$ ), 137.8, 134.7 ( $\text{CN}$ , Dipp), 130.2, 129.5, 126.6 ( $\text{CCH}$ , *m*-xylene), 124.6, 124.0, 123.5, 123.2 ( $\text{CCH}$ , Cbz), 122.5 ( $\text{CH}$ , Cbz), 119.2 ( $\text{CH}$ , Cbz), 115.8 ( $\text{CH}$ , Cbz), 113.3 ( $\text{CH}$ , Cbz), 53.5 ( $\text{CH}_2$ ), 28.2 ( $\text{CHCH}_3$ ), 23.9 ( $\text{CHCH}_3$ ), 23.8 ( $\text{CHCH}_3$ ). Anal. Calcd for  $\text{C}_{62}\text{H}_{62}\text{Au}_2\text{N}_6$ : C, 57.95; H, 4.86; N, 6.54; found: C, 58.02; H, 4.38; N, 5.96.

### $[(\text{IMes})^{o\text{-xylene}}\{\text{Au}(\text{Cbz})\}_2]$ **3d**

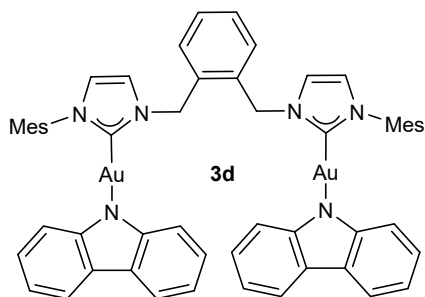

Colorless solid (99.7mg, 83%).  $^1\text{H}$  NMR (400 MHz,  $\text{CDCl}_3$ )  $\delta$  8.01 (d,  $J = 7.6$  Hz, 4H,  $\text{CH}$ , Cbz), 7.54 (dd,  $J = 5.7, 3.3$  Hz,

## SUPPORTING INFORMATION

2H,  $\underline{\text{CH}}$ , *o*-xylene), 7.20 (dd,  $J = 5.6, 3.5$  Hz, 2H,  $\underline{\text{CH}}$ , *o*-xylene), 7.16 – 7.11 (m, 4H,  $\underline{\text{CH}}$ , Cbz), 7.05 (d,  $J = 8.0$  Hz, 4H,  $\underline{\text{CH}}$ , Cbz), 7.01 (s, 4H,  $\underline{\text{CH}}$ , Mes), 7.00 – 6.94 (m, 4H,  $\underline{\text{CH}}$ , Cbz), 6.88 (d,  $J = 1.9$  Hz, 2H,  $\underline{\text{CH}}=\underline{\text{CH}}$ ), 6.60 (d,  $J = 1.9$  Hz, 2H,  $\text{CH}=\underline{\text{CH}}$ ), 5.63 (s, 4H,  $\underline{\text{CH}}_2$ ), 2.37 (s, 6H,  $\underline{\text{CH}}_3$ ), 2.09 (s, 12H,  $\underline{\text{CH}}_3$ ).  $^{13}\text{C}$  NMR (101 MHz,  $\text{CDCl}_3$ )  $\delta$  176.7 ( $\underline{\text{NCN}}$ ), 149.5 ( $\text{CH}\underline{\text{CN}}$ , Cbz), 140.0 ( $\text{CH}_3\underline{\text{C}}$ , Mes), 135.0 ( $\text{CH}_3\underline{\text{C}}$ , Mes), 134.9 ( $\underline{\text{CN}}$ , Mes), 134.0 ( $\underline{\text{CCH}}_2$ , *o*-xylene), 129.6 ( $\underline{\text{CH}}$ , *o*-xylene), 129.5 ( $\underline{\text{CH}}$ , Mes), 128.8 ( $\underline{\text{CH}}$ , *o*-xylene), 124.0 ( $\underline{\text{CCH}}$ , Cbz), 123.6 ( $\underline{\text{CH}}$ , Cbz), 122.9 ( $\underline{\text{CH}}=\underline{\text{CH}}$ ), 121.5 ( $\underline{\text{CH}}=\underline{\text{CH}}$ ), 119.8 ( $\underline{\text{CH}}$ , Cbz), 116.2 ( $\underline{\text{CH}}$ , Cbz), 113.7 ( $\underline{\text{CH}}$ , Cbz), 52.5 ( $\underline{\text{CH}}_2$ ), 21.3 ( $\underline{\text{CH}}_3$ ), 18.2 ( $\underline{\text{CH}}_3$ ). HRMS calculated for  $\text{C}_{44}\text{H}_{42}\text{N}_5\text{Au}_2$  [ $\text{M} - \text{Cbz}$ ] $^+$ :1034.2771; found : 1034.2773.

### [(IMes)*m*-xylene{Au(Cbz)}<sub>2</sub>] **3e**

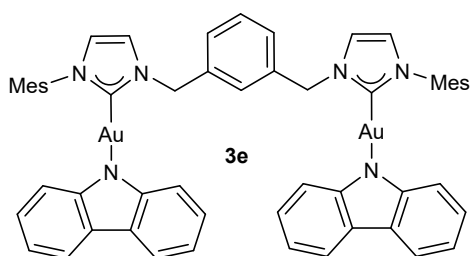

Colorless solid (109.2mg, 91%).  $^1\text{H}$  NMR (300 MHz,  $\text{DMSO-d}_6$ )  $\delta$  7.93 (d,  $J = 7.6$  Hz, 4H,  $\underline{\text{CH}}$ , Cbz), 7.76 (d,  $J = 1.9$  Hz, 2H,  $\underline{\text{CH}}=\underline{\text{CH}}$ ), 7.57 (d,  $J = 1.9$  Hz, 2H,  $\text{CH}=\underline{\text{CH}}$ ), 7.51 (m, 4H,  $\underline{\text{CH}}$ , *m*-xylene), 7.15 (s, 4H,  $\underline{\text{CH}}$ , Mes), 7.10 (m, 4H,  $\underline{\text{CH}}$ , Cbz), 7.03 (d,  $J = 7.8$  Hz, 4H,  $\underline{\text{CH}}$ , Cbz), 6.90 – 6.83 (m, 4H,  $\underline{\text{CH}}$ , Cbz), 5.67 (s, 4H,  $\underline{\text{CH}}_2$ ), 2.39 (s, 6H,  $\underline{\text{CH}}_3$ ), 2.06 (s, 12H,  $\underline{\text{CH}}_3$ ).  $^{13}\text{C}$  NMR (75 MHz,  $\text{DMSO}$ )  $\delta$  173.6 ( $\underline{\text{NCN}}$ ), 148.7 ( $\underline{\text{CN}}$ , Cbz), 139.0 ( $\text{CH}_3\underline{\text{C}}$ , Mes), 137.9 ( $\text{CH}_2\underline{\text{C}}$ , *m*-xylene), 135.4 ( $\underline{\text{CN}}$ , Mes), 134.9 ( $\text{CH}_3\underline{\text{C}}$ , Mes), 129.5, 128.9 ( $\underline{\text{CH}}$ , Mes), 127.0 ( $\text{CH}$ , *m*-xylene), 126.1 ( $\text{CH}_2\underline{\text{C}}$ , *m*-xylene), 123.5, 123.2, 122.6, 119.3 ( $\underline{\text{CH}}$ , Cbz), 115.8 ( $\underline{\text{CH}}$ , Cbz), 113.4 ( $\underline{\text{CH}}$ , Cbz), 53.5 ( $\underline{\text{CH}}_2$ ), 20.7 ( $\underline{\text{CH}}_3$ ), 17.5 ( $\underline{\text{CH}}_3$ ). HRMS calculated for  $\text{C}_{44}\text{H}_{42}\text{N}_5\text{Au}_2$  [ $\text{M} - \text{Cbz}$ ] $^+$ :1034.2771; found : 1034.2767

### [(IMes)*p*-xylene{Au(Cbz)}<sub>2</sub>] **3f**

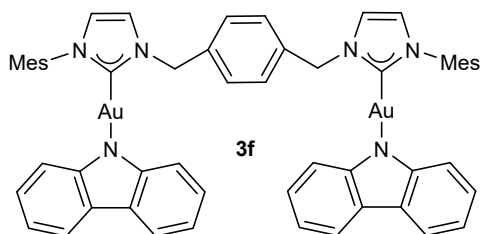

Colorless solid (81.7mg, 68%).  $^1\text{H}$  NMR (300 MHz,  $\text{DMSO-d}_6$ )  $\delta$  7.93 (d,  $J = 7.6$  Hz, 4H,  $\underline{\text{CH}}$ , Cbz), 7.87 (d,  $J = 1.9$  Hz, 2H,  $\underline{\text{CH}}=\underline{\text{CH}}$ ), 7.63 (d,  $J = 1.9$  Hz, 2H,  $\text{CH}=\underline{\text{CH}}$ ), 7.60 (s, 4H,  $\underline{\text{CH}}$ , *p*-xylene), 7.17 (s, 4H,  $\underline{\text{CH}}$ , Mes), 7.06 (m, 8H,  $\underline{\text{CH}}$ , Cbz), 6.93 – 6.81 (m, 4H,  $\underline{\text{CH}}$ , Cbz), 5.66 (s, 4H,  $\underline{\text{CH}}_2$ ), 2.39 (s, 6H,  $\underline{\text{CH}}_3$ ), 2.06 (s, 12H,  $\underline{\text{CH}}_3$ ).  $^{13}\text{C}$  NMR (101 MHz,  $\text{DMSO}$ )  $\delta$  173.4 ( $\underline{\text{NCN}}$ ),

## SUPPORTING INFORMATION

148.7 (CN, Cbz), 139.1 (CH<sub>3</sub>C, Mes), 137.1 (CH<sub>2</sub>C, *p*-xylene), 135.4 (CN, Mes), 134.9 (CH<sub>3</sub>C, Mes), 128.9 (CH, Mes), 127.9 (CH, *p*-xylene), 123.5 (CH, Cbz), 123.2 (CH=CH), 122.8, 119.3 (CH, Cbz), 115.8 (CH, Cbz), 113.4 (CH, Cbz), 53.3 (CH<sub>2</sub>), 20.7 (CH<sub>3</sub>), 17.4 (CH<sub>3</sub>). Anal. Calcd for C<sub>56</sub>H<sub>50</sub>Au<sub>2</sub>N<sub>6</sub>: C, 56.01; H, 4.20; N, 7.00; found: C, 55.48; H, 4.04; N, 6.62.

### [(IMe)<sup>*o*-xylene</sup>{Au(Cbz)}<sub>2</sub>] **3g**

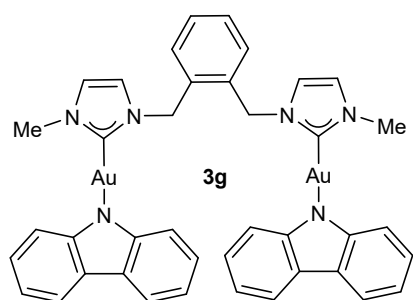

Colorless solid (71.5mg, 72%). <sup>1</sup>H NMR (400 MHz, DMSO-d<sub>6</sub>) δ 8.00 (d, *J* = 7.3 Hz, 4H, CH, Cbz), 7.46 (dd, *J* = 5.7, 3.4 Hz, 2H, CH, *o*-xylene), 7.40 (d, *J* = 8.1 Hz, 4H, CH, Cbz), 7.35 – 7.29 (m, 6H, CH, *o*-xylene; CH=CH), 7.14 (ddd, *J* = 8.2, 7.0, 1.2 Hz, 4H, CH, Cbz), 6.95 – 6.89 (m, 4H, CH, Cbz), 5.79 (s, 4H, CH<sub>2</sub>), 3.61 (s, 6H, CH<sub>3</sub>). <sup>13</sup>C NMR (75 MHz, DMSO) δ 172.6 (NCN), 148.9 (CN, Cbz), 134.5 (CH<sub>2</sub>C, *o*-xylene), 129.0 (CH, *o*-xylene), 128.7 (CH, *o*-xylene), 123.6 (CH, Cbz), 123.3 (CHC, Cbz), 123.1 (CH=CH), 121.5 (CH=CH), 119.3 (CH, Cbz), 115.8 (CH, Cbz), 113.7 (CH, Cbz), 51.1 (CH<sub>2</sub>), 37.4 (CH<sub>3</sub>).

### [(IPr)<sup>hexane-1,6-diyl</sup>{Au(Cbz)}<sub>2</sub>] **3h**

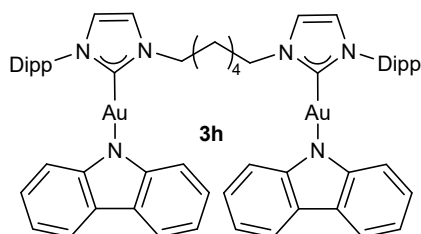

Colorless solid (116.4mg, 92%). <sup>1</sup>H NMR (400 MHz, CDCl<sub>3</sub>) δ 8.07 – 8.02 (m, 4H, CH, Cbz), 7.56 (t, *J* = 7.8 Hz, 2H, CH, Dipp), 7.32 (d, *J* = 7.8 Hz, 4H, CH, Dipp), 7.21 – 7.17 (m, 8H, CH, Cbz), 6.99 (ddd, *J* = 7.9, 5.3, 2.7 Hz, 4H, CH, Cbz), 6.72 (d, *J* = 1.9 Hz, 2H, CH=CH), 6.48 (d, *J* = 1.9 Hz, 2H, CH=CH), 4.19 (t, *J* = 7.0 Hz, 4H, CH<sub>2</sub>), 2.48 – 2.32 (m, 4H, CH(CH<sub>3</sub>)<sub>2</sub>), 2.00 (t, *J* = 6.3 Hz, 4H, CH<sub>2</sub>), 1.63 (s, 4H, CH<sub>2</sub>), 1.28 (d, *J* = 6.9 Hz, 12H, CH(CH<sub>3</sub>)<sub>2</sub>), 1.12 (d, *J* = 6.9 Hz, 12H, CH(CH<sub>3</sub>)<sub>2</sub>). <sup>13</sup>C NMR (101 MHz, CDCl<sub>3</sub>) δ 175.9 (NCN), 149.7 (CN, Cbz), 146.2 (C(<sup>*i*</sup>Pr)), 134.7 (CN, Dipp), 130.6 (CH, Dipp), 124.3 (CH, Cbz), 124.0 (CCH, Cbz), 123.6 (CH, Dipp), 123.3 (CH=CH), 120.6 (CH=CH), 119.7 (CH, Cbz), 116.0 (CH, Cbz), 113.7 (CH, Cbz), 50.3 (CH<sub>2</sub>), 31.1 (CH<sub>2</sub>), 28.67 (CH(CH<sub>3</sub>)<sub>2</sub>), 25.1 (CH<sub>2</sub>), 24.5 (CH(CH<sub>3</sub>)<sub>2</sub>), 24.4 (CH(CH<sub>3</sub>)<sub>2</sub>). Anal. Calcd for C<sub>60</sub>H<sub>66</sub>Au<sub>2</sub>N<sub>6</sub>: C, 56.96; H, 5.26; N, 6.64; found: C, 57.61; H, 4.95; N, 6.13.

### [(IPr)<sup>*o*-xylene</sup>{Au(1*H*-benzimidazolato)}<sub>2</sub>] **4a**

## SUPPORTING INFORMATION

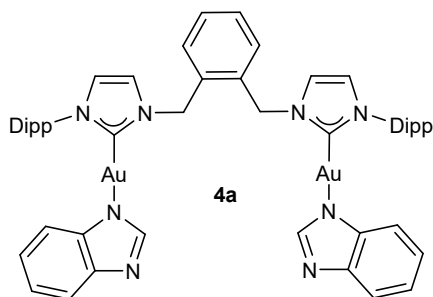

Colorless solid (96.1mg, 81%).  $^1\text{H}$  NMR (300 MHz,  $\text{CDCl}_3$ )  $\delta$  7.64 (d,  $J = 7.9$  Hz, 2H, CH, amine), 7.60 (s, 2H, NCHN, amine), 7.56 – 7.49 (m, 4H, CH, Dipp; CH, *o*-xylene), 7.29 (d,  $J = 7.8$  Hz, 4H, CH, Dipp), 7.13 (dd,  $J = 5.5, 3.5$  Hz, 2H, CH, *o*-xylene), 7.05 – 6.97 (m, 2H, CH, amine), 6.91 (m, 4H, CH, amine; CH=CH), 6.85 (d,  $J = 1.9$  Hz, 2H, CH=CH), 6.79 (d,  $J = 7.8$  Hz, 2H, CH, amine), 5.62 (s, 4H, CH<sub>2</sub>), 2.48 (dt,  $J = 13.6, 6.8$  Hz, 4H, CH(CH<sub>3</sub>)<sub>2</sub>), 1.31 (d,  $J = 6.8$  Hz, 6H, CH(CH<sub>3</sub>)<sub>2</sub>), 1.15 (d,  $J = 6.9$  Hz, 12H, CH(CH<sub>3</sub>)<sub>2</sub>).  $^{13}\text{C}$  NMR (101 MHz,  $\text{CDCl}_3$ )  $\delta$  175.4 (NCN), 150.5 (CH, amine), 145.8 (C(<sup>*i*</sup>Pr), Dipp), 144.4 (CN, amine), 142.3 (CN, amine), 134.0 (CN, Dipp), 133.8 (CH<sub>2</sub>C, *o*-xylene), 131.1 (CH, Dipp), 129.8 (CH, *o*-xylene), 128.8 (CH, *o*-xylene), 124.5 (CH, Dipp), 124.4, 121.4, 120.0, 119.9, 118.9 (CH, amine), 114.1 (CH, amine), 52.7 (CH<sub>2</sub>), 28.8 (CH(CH<sub>3</sub>)<sub>2</sub>), 24.7 (CH(CH<sub>3</sub>)<sub>2</sub>), 24.4 (CH(CH<sub>3</sub>)<sub>2</sub>). Anal. Calcd for C<sub>52</sub>H<sub>56</sub>Au<sub>2</sub>N<sub>8</sub>: C, 52.62; H, 4.76; N, 9.44; found: C, 52.85; H, 4.11; N, 8.54.

[(IPr)*o*-xylene{Au(5,6-dimethyl-1*H*-benzimidazolato)}<sub>2</sub>]**4b**

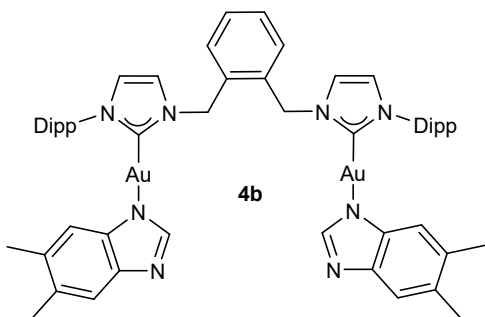

Colorless solid (106.9mg, 86%).  $^1\text{H}$  NMR (300 MHz,  $\text{CDCl}_3$ )  $\delta$  7.58 – 7.49 (m, 6H, CH, amine; CH, Dipp; CH, *o*-xylene), 7.39 (s, 2H, CH, amine), 7.31 (d,  $J = 7.8$  Hz, 4H, CH, Dipp), 7.12 (dd,  $J = 5.5, 3.4$  Hz, 2H, CH, *o*-xylene), 6.99 (d,  $J = 1.9$  Hz, 2H, CH=CH), 6.90 (d,  $J = 1.9$  Hz, 2H, CH=CH), 6.56 (s, 2H, CH, amine), 5.62 (s, 4H, CH<sub>2</sub>), 2.51 (dt,  $J = 13.6, 6.8$  Hz, 4H, CH(CH<sub>3</sub>)<sub>2</sub>), 2.28 (s, 6H, CH<sub>3</sub>, amine), 2.20 (s, 6H, CH<sub>3</sub>, amine), 1.32 (d,  $J = 6.8$  Hz, 12H, CH(CH<sub>3</sub>)<sub>2</sub>), 1.15 (d,  $J = 6.9$  Hz, 12H, CH(CH<sub>3</sub>)<sub>2</sub>).  $^{13}\text{C}$  NMR (75 MHz,  $\text{CDCl}_3$ )  $\delta$  175.8 (NCN), 149.8 (CH, amine), 145.9 (C(<sup>*i*</sup>Pr), Dipp), 143.0 (CN, amine), 140.9 (CN, amine), 140.2, 134.1 (CN, Dipp), 133.8 (CH<sub>2</sub>C, *o*-xylene), 131.1 (CH, Dipp), 129.7 (CH, *o*-xylene), 128.7 (CH, *o*-xylene), 128.5 (CH<sub>3</sub>C, amine), 124.4 (CH, Dipp), 124.3, 121.4, 118.9 (CH, amine), 114.3 (CH, amine), 52.7 (CH<sub>2</sub>), 28.9 (CH(CH<sub>3</sub>)<sub>2</sub>), 24.6 (CH(CH<sub>3</sub>)<sub>2</sub>), 24.4 (CH(CH<sub>3</sub>)<sub>2</sub>), 20.4 (CH<sub>3</sub>, amine), 20.4 (CH<sub>3</sub>, amine). Anal. Calcd for C<sub>56</sub>H<sub>64</sub>Au<sub>2</sub>N<sub>8</sub>: C, 54.11; H, 5.19; N, 9.01; found: C, 53.76; H, 3.93; N, 8.86.

[(IPr)*o*-xylene{Au(4,5-diphenyl-1*H*-imidazolato)}<sub>2</sub>]**4c**

## SUPPORTING INFORMATION

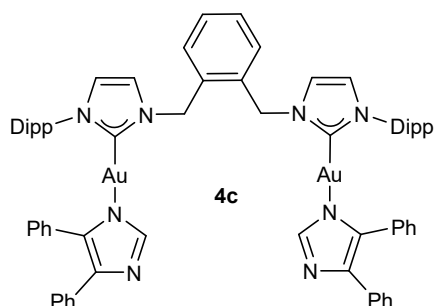

Colorless solid (121.0mg, 87%).  $^1\text{H}$  NMR (400 MHz,  $\text{CDCl}_3$ )  $\delta$  7.52 (t,  $J = 7.8$  Hz, 2H,  $\text{CH}$ , Dipp), 7.45 – 7.40 (m, 6H,  $\text{CH}$ , Ph), 7.31 (dd,  $J = 8.2, 1.3$  Hz, 4H,  $\text{CH}$ , Ph), 7.25 (d,  $J = 7.2$  Hz, 4H,  $\text{CH}$ , Dipp), 7.16 – 7.10 (m, 4H,  $\text{CH}$ , Ph), 7.08 (s, 2H,  $\text{CH}$ , amine), 7.06 – 7.00 (m, 4H,  $\text{CH}$ , *o*-xylene), 6.99 – 6.92 (m, 8H,  $\text{CH}$ , Ph;  $\text{CH}=\text{CH}$ ), 6.84 (d,  $J = 1.9$  Hz, 2H,  $\text{CH}=\text{CH}$ ), 5.29 (s, 2H,  $\text{CH}_2$ ), 2.38 (dt,  $J = 13.7, 6.8$  Hz, 4H,  $\text{CH}(\text{CH}_3)_2$ ), 1.17 (d,  $J = 6.9$  Hz, 12H,  $\text{CH}(\text{CH}_3)_2$ ), 1.10 (d,  $J = 6.9$  Hz, 12H,  $\text{CH}(\text{CH}_3)_2$ ).  $^{13}\text{C}$  NMR (75 MHz,  $\text{CDCl}_3$ )  $\delta$  174.9 ( $\text{NCN}$ ), 145.6 ( $\text{C}(\text{Pr})$ , Dipp), 143.9, 137.2, 137.1, 136.9, 134.4, 133.8 ( $\text{CN}$ , Dipp), 133.3 ( $\text{CH}_2\text{C}$ , *o*-xylene), 131.0 ( $\text{CH}$ , Dipp), 129.5, 129.4 ( $\text{CH}$ , Ph), 128.2, 128.0, 127.9 ( $\text{CH}$ , *o*-xylene), 127.4 ( $\text{CH}$ , Ph), 126.0 ( $\text{CH}$ , Dipp), 125.2 ( $\text{CH}$ , Ph), 124.7 ( $\text{CH}=\text{CH}$ ), 124.4 ( $\text{CH}$ , Dipp), 121.2 ( $\text{CH}=\text{CH}$ ), 52.3 ( $\text{CH}_2$ ), 28.8 ( $\text{CH}(\text{CH}_3)_2$ ), 24.5 ( $\text{CH}(\text{CH}_3)_2$ ), 24.2 ( $\text{CH}(\text{CH}_3)_2$ ). Anal. Calcd for  $\text{C}_{68}\text{H}_{68}\text{Au}_2\text{N}_8$ : C, 58.70; H, 4.93; N, 8.05; found: C, 58.65; H, 4.84; N, 7.96.

### Photocatalytic Experiments

#### General procedure for the [2+2] cycloaddition of diallyl ether

Diallyl ether (0.16 mmol, 40 mg) was weighted and transferred in 4 mL vial equipped with stirring bar and catalyst (0.5 mol%) was added from the stock solution. Solvent (3 mL) was added in reaction mixture and the vial was closed with screw cap and was degassed by bubbling Ar for 3 minutes. The vial was placed into photoreactor for indicated time. The conversion was determined by gas chromatography using dodecane as internal standard. Each experiment was performed twice and the average conversion is reported.

## SUPPORTING INFORMATION

### General procedure for the [2+2] cycloaddition of indole

Diethyl 2-((1*H*-indol-3-yl)methyl)-2-allylmalonate (0.1 mmol, 32.9 mg) was weighted and transferred in 4 mL vial equipped with stirring bar and catalyst (1 mol%) was added from the stock solution. Solvent (2 mL) was added in reaction mixture and the vial was closed with screw cap and was degassed by bubbling Ar for 3 minutes. The vial was placed into photoreactor for indicated time. The residue was purified through silica gel column chromatography by using petroleum ether/ethyl acetate (6:1) as the eluent. Each experiment was performed twice and the average yield is reported.

**Table S1** Selected optimization results of the reaction conditions for indole **5**<sup>a</sup>

| Entry | Catalyst (mol%) | Solvent (ml) | Time (h) | Conversion (Yield) <sup>b</sup> (%) |
|-------|-----------------|--------------|----------|-------------------------------------|
| 1     | <b>3a</b>       | EtOAc        | 1        | 99 (91)                             |
| 2     | <b>3b</b>       | EtOAc        | 1        | 99                                  |
| 3     | <b>3d</b>       | EtOAc        | 1        | 99                                  |
| 4     | <b>3e</b>       | EtOAc        | 1        | 99                                  |
| 5     | <b>3f</b>       | EtOAc        | 1        | 50                                  |

<sup>a</sup> Indole **5** (0.1 mol, 1 eq.), catalyst (1 mol%), solvent (2 ml) at room temperature under Ar. <sup>b</sup> NMR conversion (Isolated yields are in parentheses).

<sup>1</sup>H NMR (300 MHz, CDCl<sub>3</sub>) δ 7.07 (dd, *J* = 19.5, 7.4 Hz, 2H), 6.74 (t, *J* = 7.0 Hz, 1H), 6.64 (d, *J* = 7.7 Hz, 1H), 4.26 (dq, *J* = 14.1, 7.0 Hz, 4H), 4.12 – 4.03 (m, 1H), 2.90 (dd, *J* = 7.6, 3.6 Hz, 1H), 2.80 (d, *J* = 14.3 Hz, 1H), 2.66 – 2.39 (m, 3H), 2.20 – 2.00 (m, 2H), 1.30 (dd, *J* = 15.1, 7.2 Hz, 6H). <sup>13</sup>C NMR (101 MHz, CDCl<sub>3</sub>) δ 172.3, 172.2, 152.4, 133.5, 128.3, 123.2, 119.2, 110.4,



## SUPPORTING INFORMATION

---

63.5, 61.9, 61.7, 60.9, 60.8, 47.1, 43.6, 41.1, 35.4, 14.2. Analytical data obtained are in agreement with reported values.<sup>9</sup>

### General procedure for the cyclization of indole **6**

Diethyl 2-((1*H*-indol-3-yl)methyl)malonate were synthesized according to previously reported procedure.<sup>9</sup>

**The synthetic route of diethyl 2-((1*H*-indol-3-yl)methyl)-2-(3-methylbut-2-en-1-yl)malonate (**6**):** To a solution of diethyl 2-((1*H*-indol-3-yl)methyl)malonate (1.15 g, 4 mmol, 1.0 equiv) in THF (10 mL) NaH (60% in oil) (191 mg, 4.8 mmol, 1.2 equiv.) was added, the reaction mixture was allowed to stir for 30 minutes at ambient temperature. After it was cooled down to 0°C in ice bath followed by the dropwise addition of 1-bromo-3-methylbut-2-ene (551 µL, 4.8 mmol, 1.2 equiv.). Then the reaction was allowed to stir at ambient temperature for 16-20 hours. After the reaction was complete (monitored by TLC), it was quenched with water (20 mL). The aqueous layer was extracted with EtOAc (30 mL x 3). The combined organic layers were washed with brine, dried over Na<sub>2</sub>SO<sub>4</sub>, filtered and concentrated by rotary evaporation. Then the residue was purified by silica gel column chromatography (PE/EtOAc = 5:1) to afford the desired products **6** in 63% yield (Yellow oil, 903 mg).

<sup>1</sup>H NMR (300 MHz, CDCl<sub>3</sub>) δ 8.03 (br s, 1H, NH), 7.55 (d, *J* = 7.8 Hz, 1H, CH<sup>Ar</sup>), 7.34 – 7.28 (m, 1H, CH<sup>Ar</sup>), 7.19 – 7.11 (m, 1H, CH<sup>Ar</sup>), 7.11 – 7.03 (m, 1H, CH<sup>Ar</sup>), 6.96 (d, *J* = 2.1 Hz, 1H, CH<sup>Ar</sup>), 5.21 – 5.10 (m, 1H, CHCH<sub>2</sub>), 4.23 – 4.00 (m, 4H, CH<sub>2</sub>CH<sub>3</sub>), 3.41 (s, 2H, CH<sub>2</sub>C), 2.62 (d, *J* = 7.1 Hz, 2H, CH<sub>2</sub>CH), 1.72 (s, 3H, CH<sub>3</sub>C), 1.52 (s, 3H, CH<sub>3</sub>C), 1.19 (t, *J* = 7.1 Hz, 6H, CH<sub>2</sub>CH<sub>3</sub>). <sup>13</sup>C NMR (75 MHz, CDCl<sub>3</sub>) δ 171.8 (C=O), 135.9 (C<sup>Ar</sup>), 135.5 (C<sup>Ar</sup>), 128.4 (C<sup>Ar</sup>), 123.2 (CH<sup>Ar</sup>), 122.0 (CH<sup>Ar</sup>), 119.4 (CH<sup>Ar</sup>), 119.0 (CH<sup>Ar</sup>), 118.3 (CHCH<sub>2</sub>), 111.1 (CH<sup>Ar</sup>), 110.5 (C<sup>Ar</sup>), 61.3 (CH<sub>2</sub>CH<sub>3</sub>), 58.8 (C(CO<sub>2</sub>Et)<sub>2</sub>), 31.3 (CH<sub>2</sub>CH), 27.7 (CH<sub>2</sub>C), 26.2 (CH<sub>3</sub>C), 18.2

## SUPPORTING INFORMATION

(CH<sub>3</sub>C), 14.1 (CH<sub>2</sub>CH<sub>3</sub>). **HRMS** (ESI-TOF): Calcd for C<sub>21</sub>H<sub>28</sub>NO<sub>4</sub><sup>+</sup> [M+H]<sup>+</sup> 358.2013; found 358.2001.

**General procedure for the cyclization of indole 6:** Diethyl 2-((1*H*-indol-3-yl)methyl)-2-(3-methylbut-2-en-1-yl)malonate **6** (0.2 mmol, 71.5 mg) was weighted and transferred in 20 ml flash tube equipped with stirring bar and catalyst **3a** (2 mol%) was added from the stock solution. Solvent (4 mL) was added in reaction mixture and the tube was closed with rubber cap and was degassed by bubbling Ar for 3 minutes. The tube was placed into photoreactor for indicated time. The residue was purified through silica gel column chromatography by using petroleum ether/ethyl acetate (6:1) as the eluent. Each experiment was performed twice and the average yield is reported.

**Table S2** Selected optimization results of the reaction conditions for indole **6**<sup>a</sup>

| Entry          | Catalyst (mol%) | Solvent (ml) | Time (h) | Conversion (Yield) <sup>b</sup> (%) |
|----------------|-----------------|--------------|----------|-------------------------------------|
| 1 <sup>c</sup> | <b>3a</b>       | EtOAc        | 1        | -                                   |
| 2              | <b>3a</b>       | EtOAc        | 1        | -                                   |
| 3              | <b>3a</b>       | EtOAc        | 18       | 74 (64)                             |
| 4              | <b>3a</b>       | EtOAc        | 22       | 78                                  |
| 5              | <b>3a</b>       | THF          | 18       | 35                                  |

<sup>a</sup> Indole **6** (0.2 mol, 1 eq.), catalyst (2 mol%), solvent (4 ml) at room temperature under Ar. <sup>b</sup> NMR conversion (Isolated yields are in parentheses). <sup>c</sup> 1 mol% of **3a**.

<sup>1</sup>H NMR (300 MHz, CDCl<sub>3</sub>) δ 7.88 (s, 1H), 7.54 (dd, *J* = 6.5, 2.6 Hz, 1H), 7.25 – 7.21 (m, 1H), 7.12 – 7.03 (m, 2H), 4.16 – 3.97 (m, 4H), 3.47 (s, 2H), 2.40 (dd, *J* = 7.6, 4.1 Hz, 2H), 1.97 – 1.89 (m, 2H), 1.39 (s, 6H), 1.14 (t, *J* = 7.1 Hz, 6H). <sup>13</sup>C NMR (75 MHz, CDCl<sub>3</sub>) δ 172.0, 142.6,

## SUPPORTING INFORMATION

134.3, 129.4, 121.0, 119.3, 118.1, 110.4, 106.2, 61.3, 56.9, 37.0, 35.6, 30.7, 28.2, 28.1, 14.1.

HRMS calculated for  $C_{21}H_{28}NO_4$   $[M+H]^+$ : 358.2015; found : 358.2000

### Absorption and PL spectroscopy

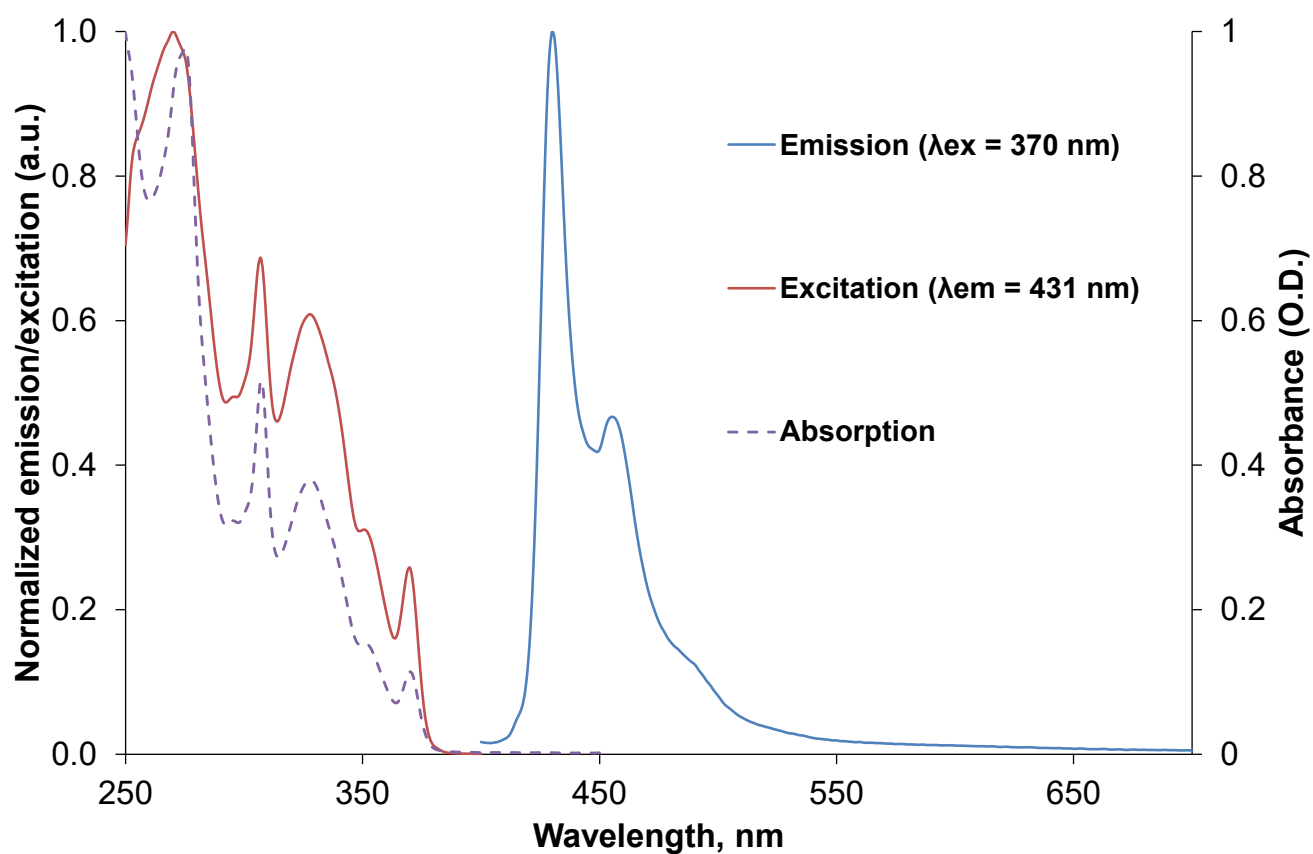

Figure S1. Absorption and emission spectra of 3a

## SUPPORTING INFORMATION

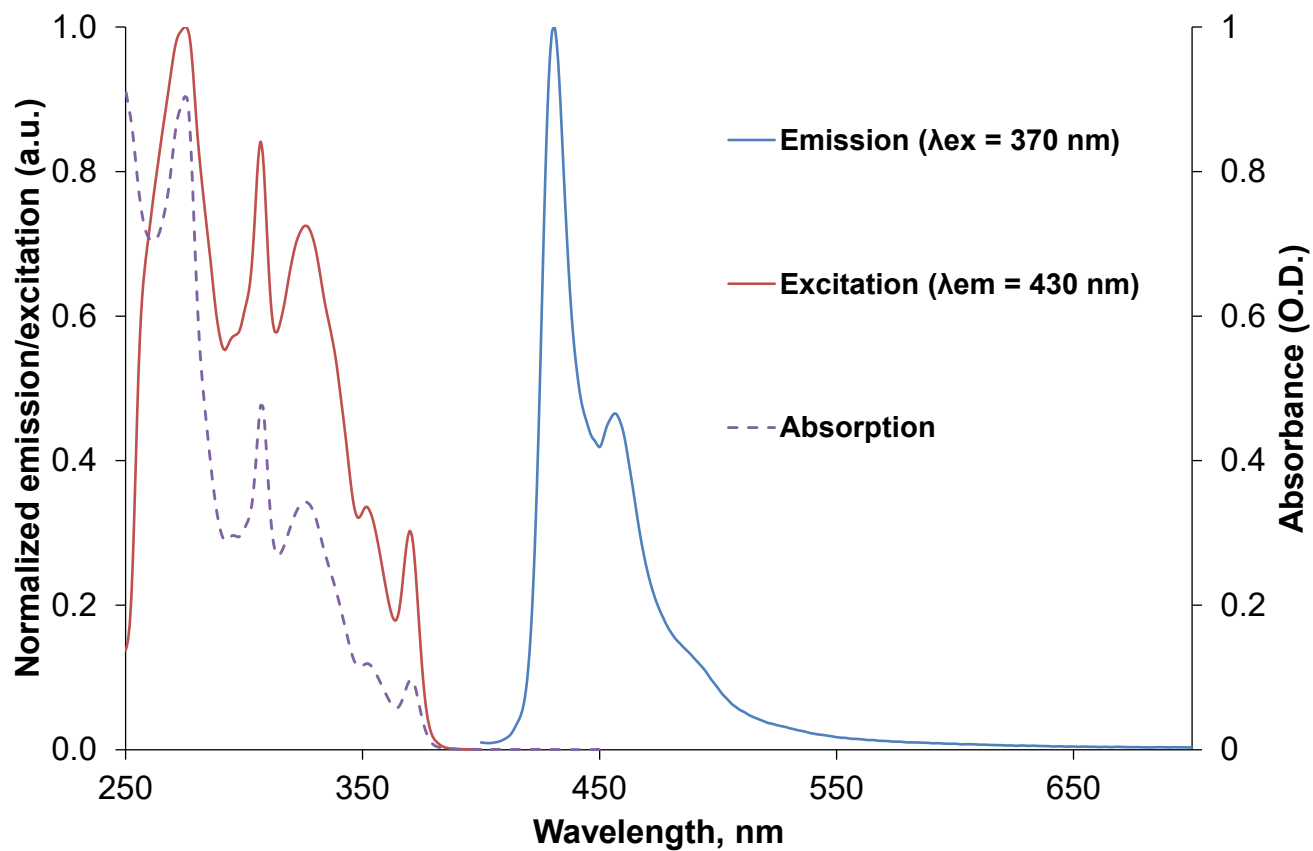

**Figure S2.** Absorption and emission spectra of **3b**

## SUPPORTING INFORMATION

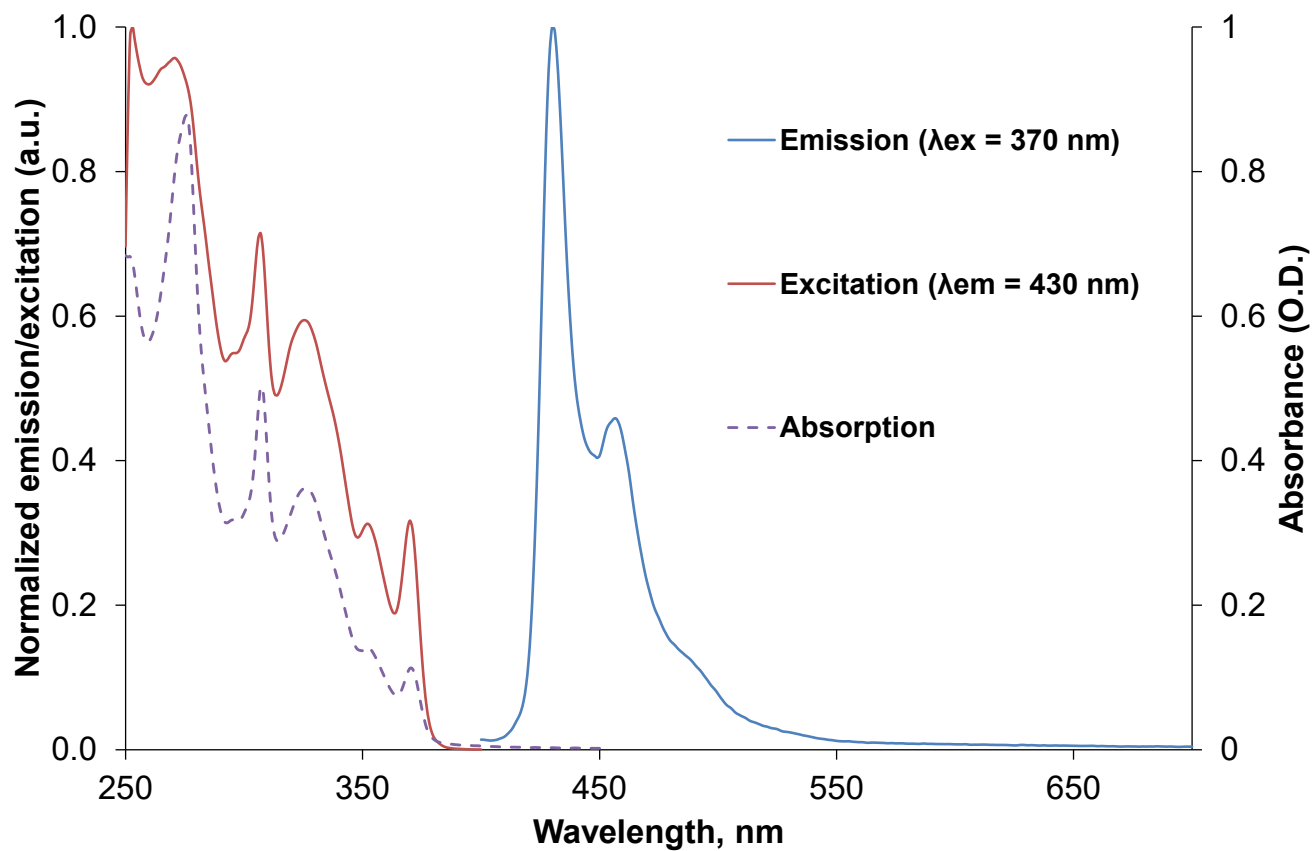

**Figure S3.** Absorption and emission spectra of **3d**

## SUPPORTING INFORMATION

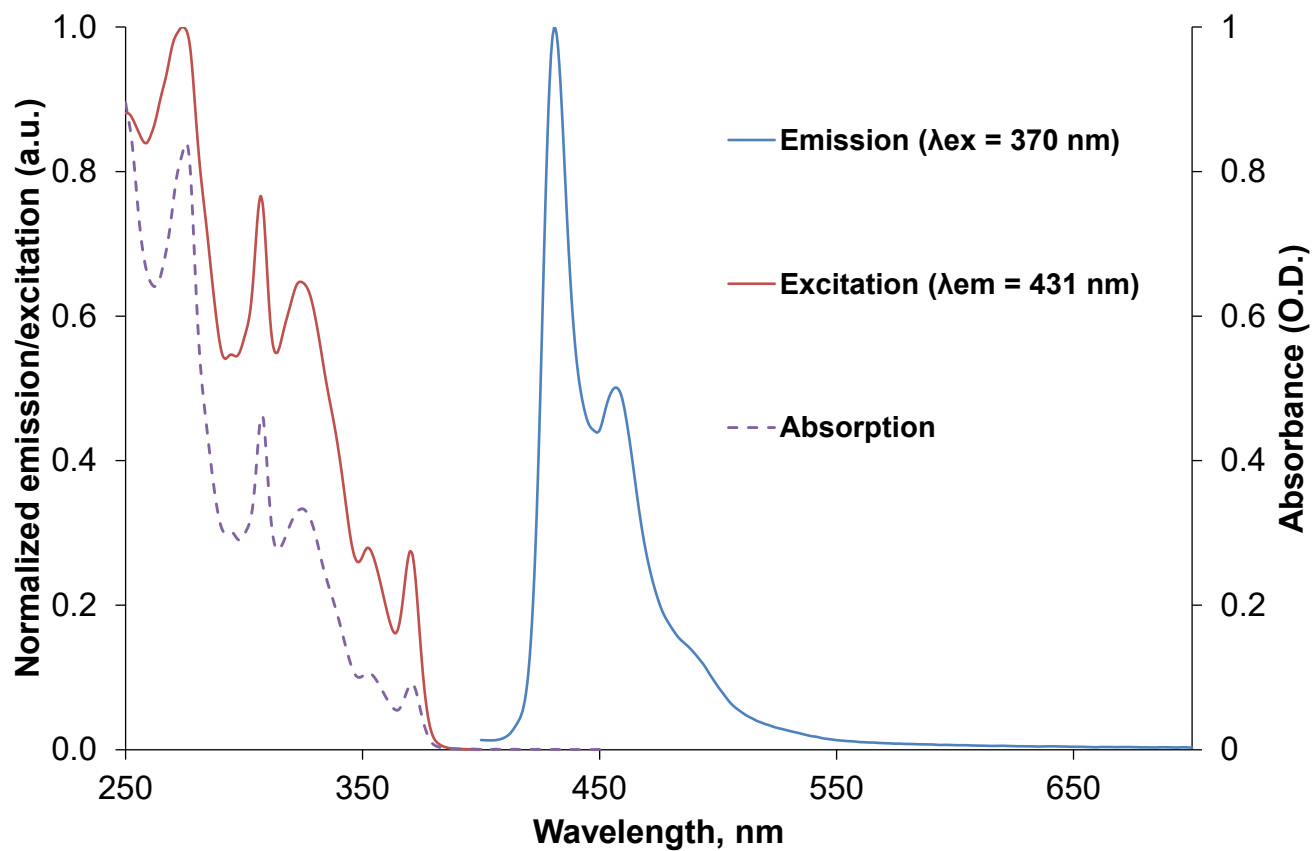

**Figure S4.** Absorption and emission spectra of **3e**

## SUPPORTING INFORMATION

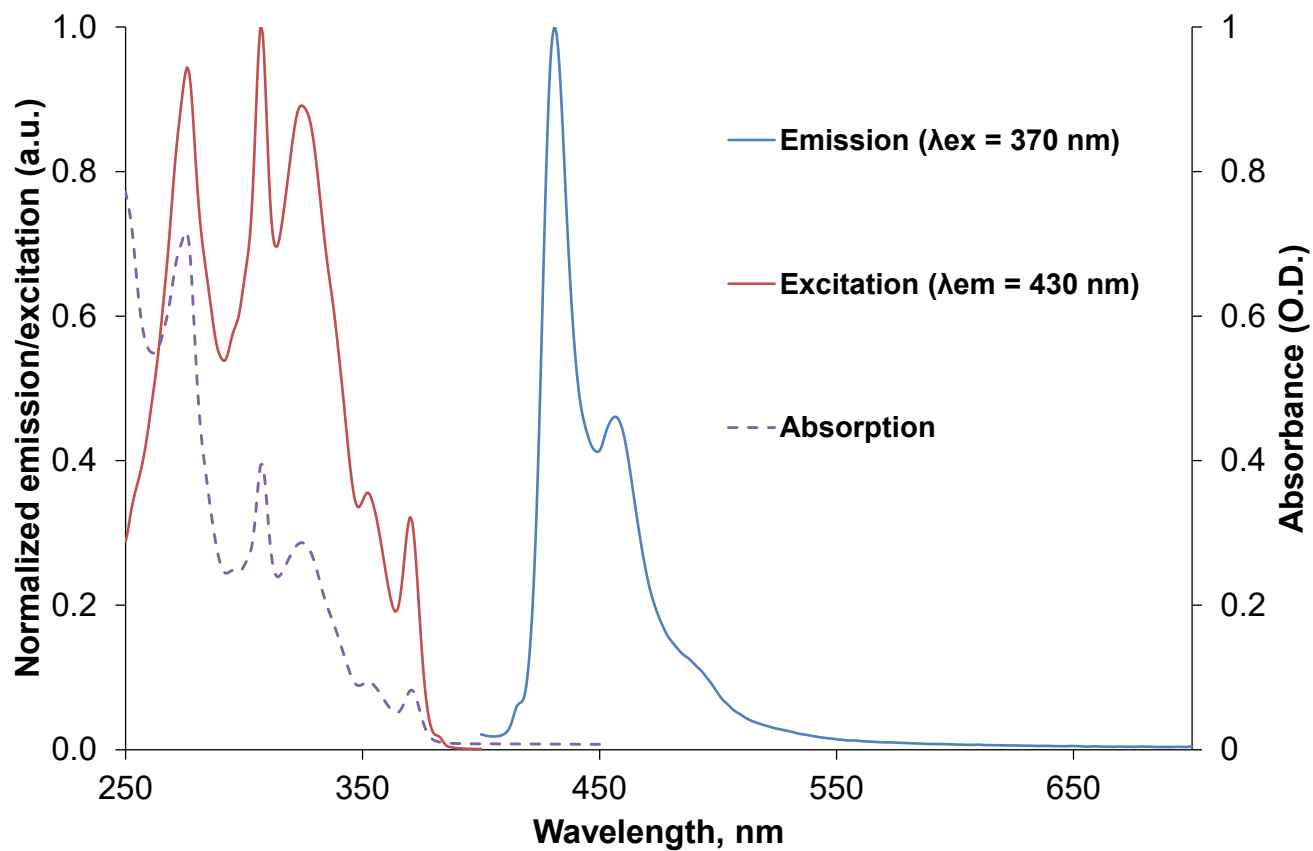

**Figure S5.** Absorption and emission spectra of **3f**

## SUPPORTING INFORMATION

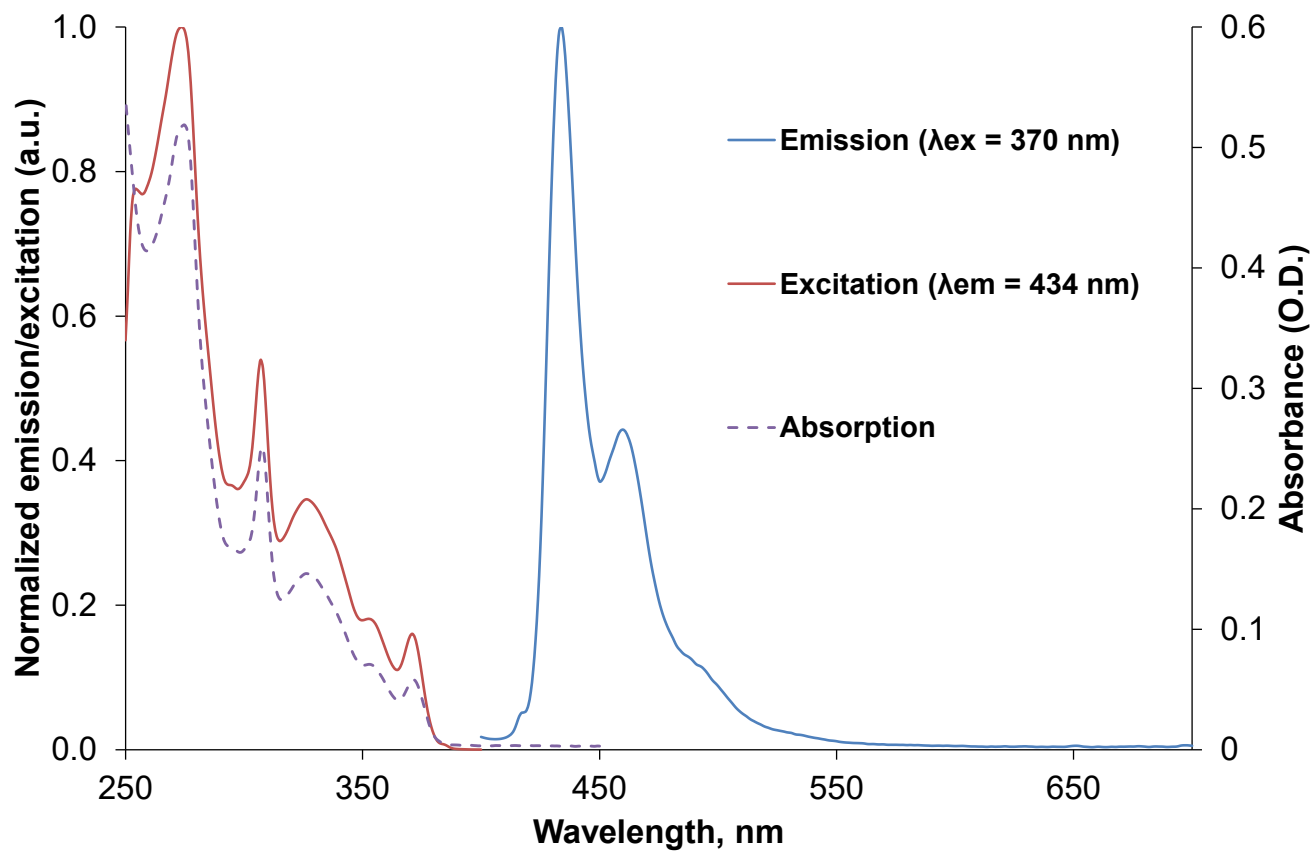

**Figure S6.** Absorption and emission spectra of **3g**



## SUPPORTING INFORMATION

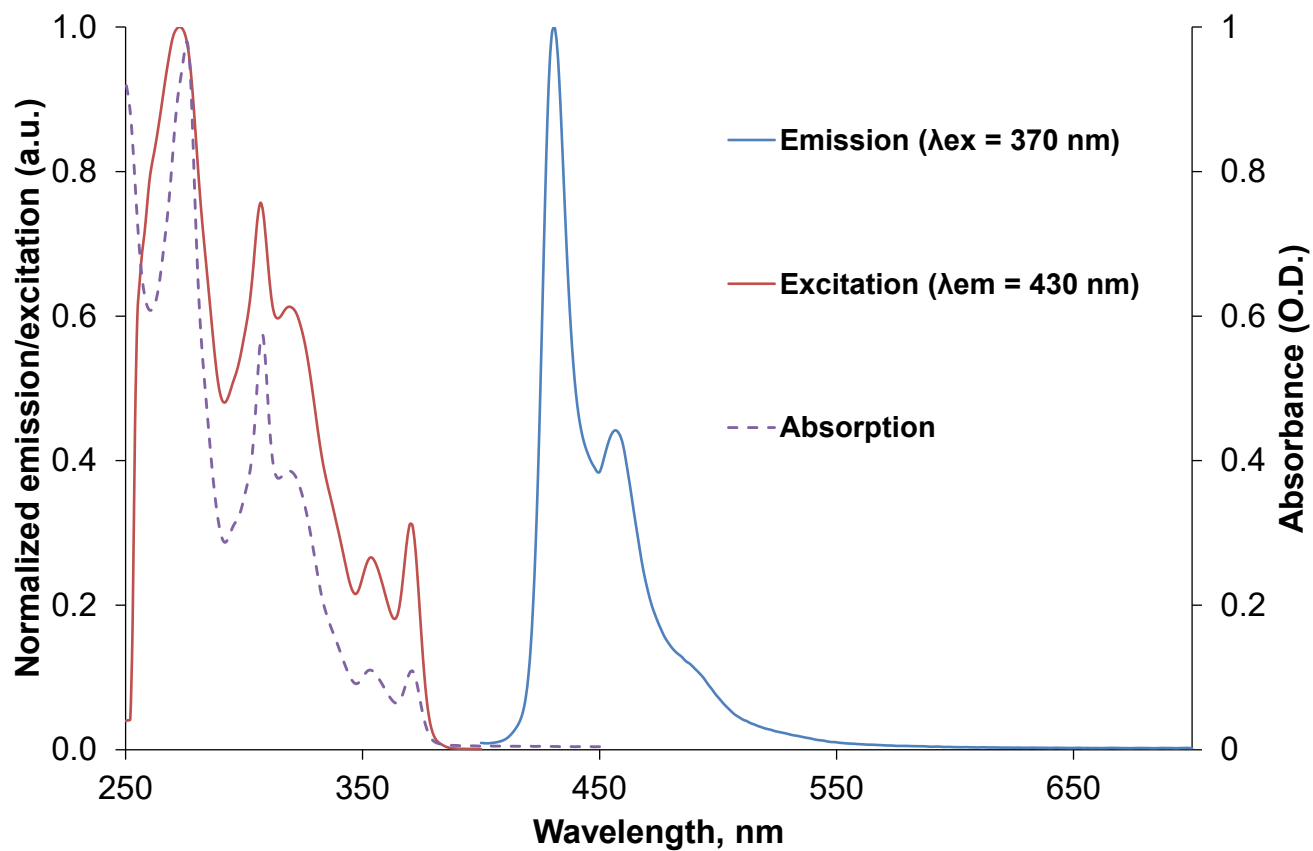

**Figure S7.** Absorption and emission spectra of **3h**

## SUPPORTING INFORMATION

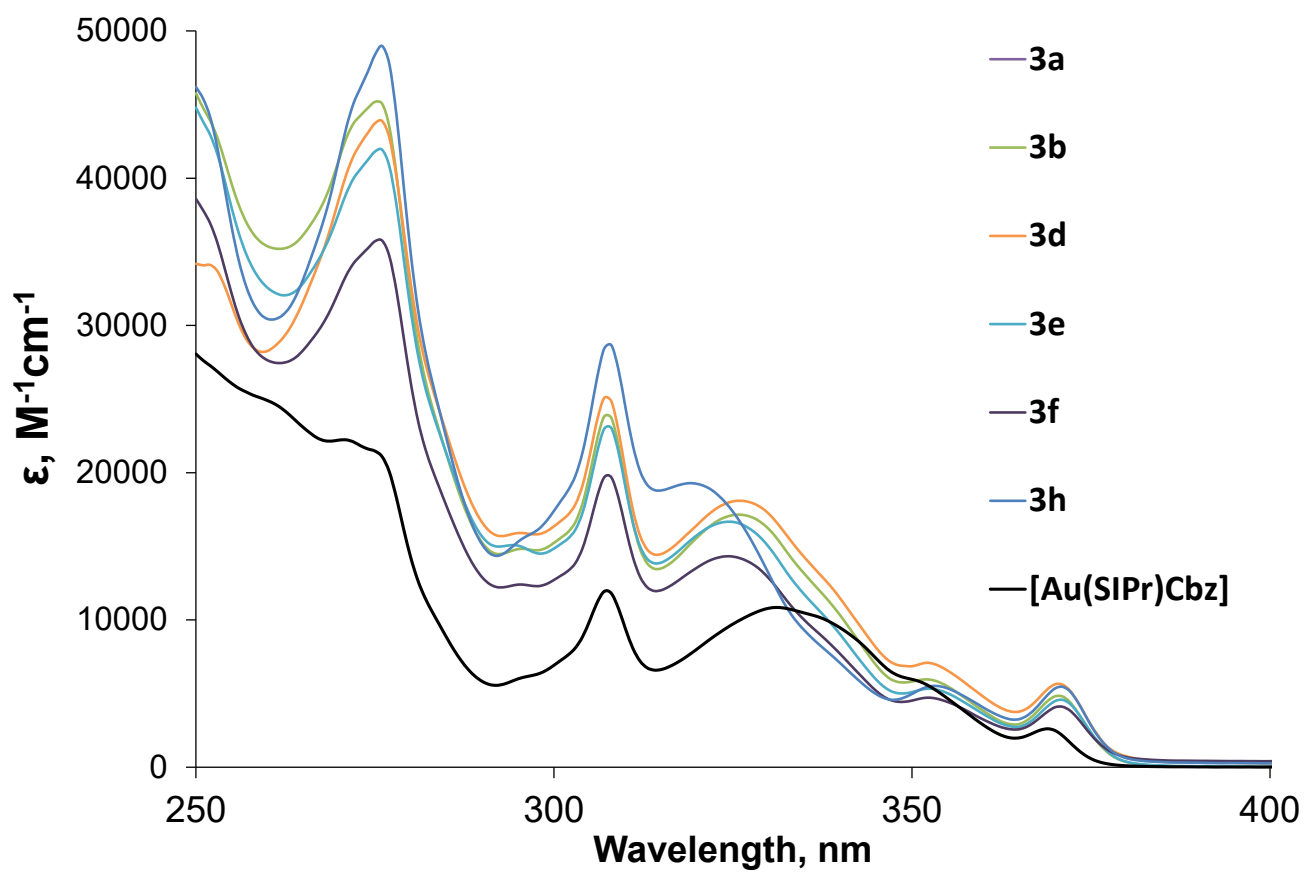

**Figure S8.** Absorption spectra of complexes 3a-h

## SUPPORTING INFORMATION

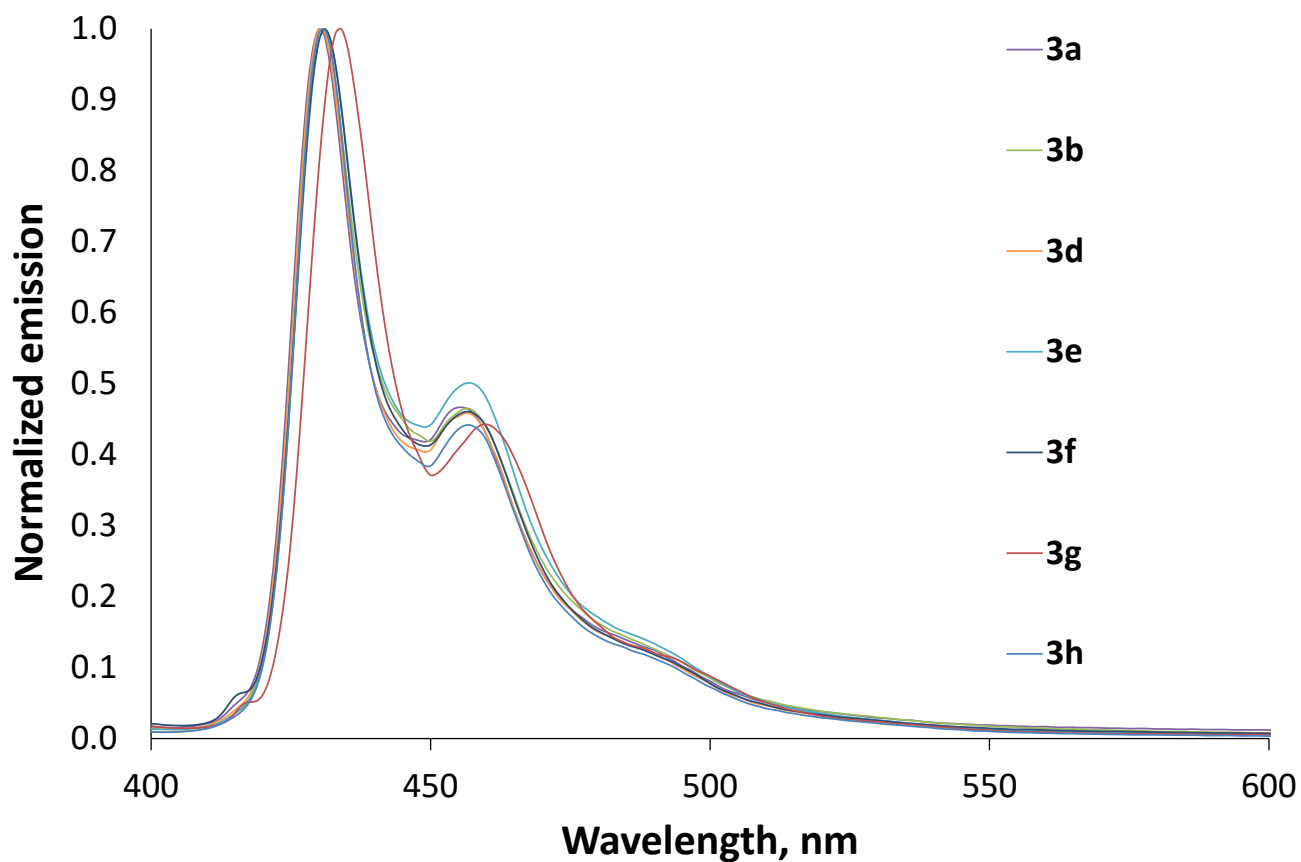

**Figure S9.** Emission spectra of complexes **3a-h** in THF

## SUPPORTING INFORMATION

---

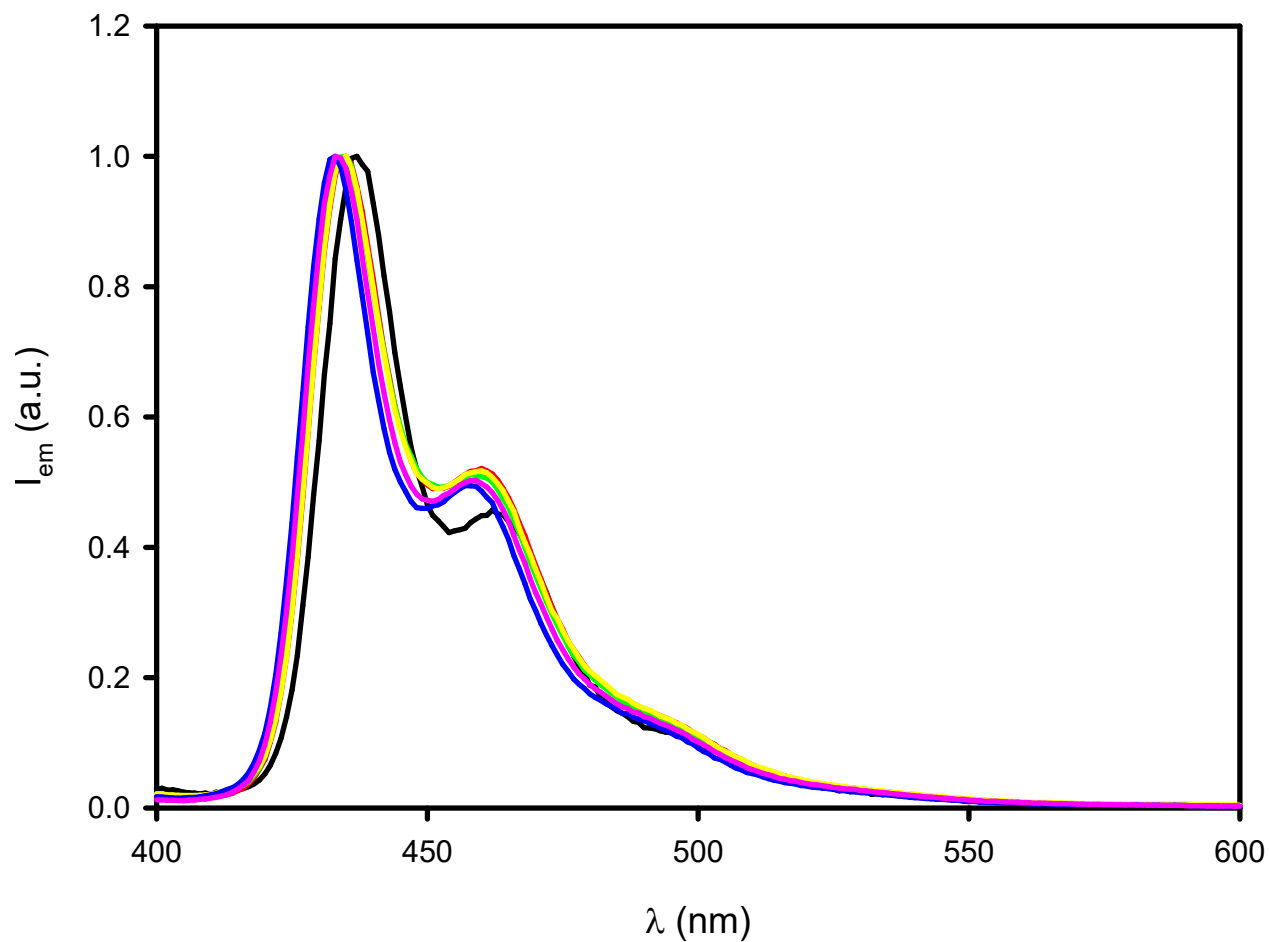

**Figure S10.** Emission spectra in deaerated DMSO of **3g** (black), **3f** (blue), **3e** (green), **3d** (red), **3b** (yellow), **3a** (pink) and. ( $\lambda_{exc} = 370$  nm)

## SUPPORTING INFORMATION

---

**Table S3** Photophysical parameters of the complexes studied.

| <b>C</b>  | <b>DMSO deaerated</b>                 |                                              |                              |
|-----------|---------------------------------------|----------------------------------------------|------------------------------|
|           | <b><math>\lambda_{em}</math> [nm]</b> | <b><math>\tau</math> [<math>\mu</math>s]</b> | <b><math>\phi</math> [%]</b> |
| <b>3a</b> | 434                                   | 163                                          | 37                           |
| <b>3b</b> | 435                                   | 167                                          | 45                           |
| <b>3d</b> | 435                                   | 126                                          | 41                           |
| <b>3e</b> | 435                                   | 224                                          | 77                           |
| <b>3f</b> | 434                                   | 262                                          | 47                           |
| <b>3g</b> | 437                                   | 48                                           | 16                           |

<sup>a</sup> Characterization in solution was performed in deaerated DMSO.

## SUPPORTING INFORMATION

### Molecular Structures of Complexes

Crystals that were of suitable quality for single crystal X-ray diffraction analysis were obtained in all cases by slow vapor diffusion of the antisolvent (hexane or pentane) into saturated solutions (THF or DCM) of the complexes at 4 °C. CCDC 2213682-2213683 (**3c** and **3e**) and CCDC 2243593 (**8**) contain the supplementary crystallographic data for this paper. These data can be obtained free of charge from The Cambridge Crystallographic Data Centre via [www.ccdc.cam.ac.uk/structures](http://www.ccdc.cam.ac.uk/structures).

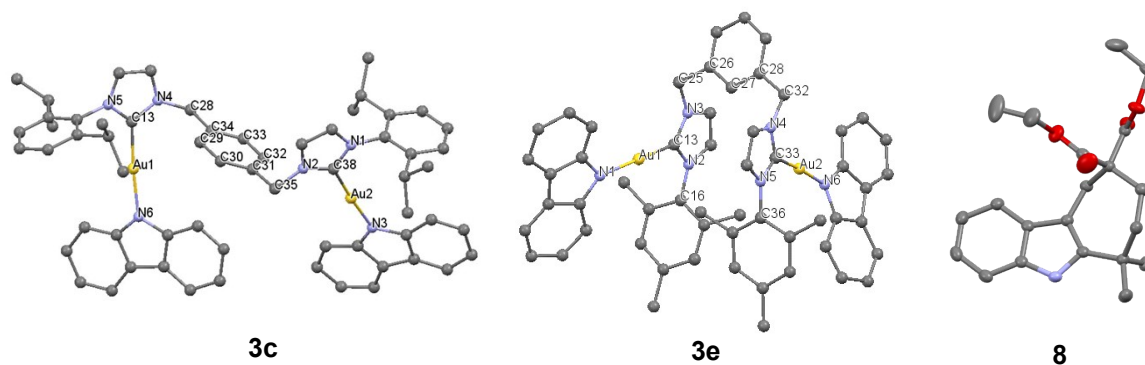

**Figure S11** X-ray molecular structure of **3c**, **3e** and **8**, showing thermal displacement ellipsoids at the 50% probability level and hydrogen atoms omitted for clarity.

**Table S4** Selected bond lengths (Å) and angles (°) for **3c** and **3e**

| Complex <b>3c</b>                                |           | Complex <b>3e</b>                                |          |
|--------------------------------------------------|-----------|--------------------------------------------------|----------|
| C <sub>13</sub> -Au <sub>1</sub>                 | 1.993(6)  | C <sub>13</sub> -Au <sub>1</sub>                 | 1.974(8) |
| C <sub>38</sub> -Au <sub>2</sub>                 | 1.980(6)  | C <sub>38</sub> -Au <sub>2</sub>                 | 1.982(9) |
| Au <sub>1</sub> -Au <sub>2</sub>                 | 9.0390(5) | Au <sub>1</sub> -Au <sub>2</sub>                 | 6.273(1) |
| C <sub>13</sub> -Au <sub>1</sub> -N <sub>6</sub> | 175.7(2)  | C <sub>13</sub> -Au <sub>1</sub> -N <sub>1</sub> | 174.8(3) |
| C <sub>38</sub> -Au <sub>2</sub> -N <sub>3</sub> | 175.4(2)  | C <sub>33</sub> -Au <sub>2</sub> -N <sub>6</sub> | 174.0(3) |
| N <sub>2</sub> -C <sub>35</sub> -C <sub>31</sub> | 111.8(5)  | N <sub>3</sub> -C <sub>25</sub> -C <sub>26</sub> | 112.2(7) |

## SUPPORTING INFORMATION

|                                                           |                                                           |
|-----------------------------------------------------------|-----------------------------------------------------------|
| C <sub>34</sub> -C <sub>28</sub> -N <sub>4</sub> 113.7(5) | C <sub>28</sub> -C <sub>32</sub> -N <sub>4</sub> 115.5(7) |
|-----------------------------------------------------------|-----------------------------------------------------------|

**Table S5** Crystallographic data for **3c**, **3e** and **8**

|                                        | Complex <b>3c</b> ·THF                                           | Complex <b>3e</b>                                              | Compound <b>8</b>                                             |
|----------------------------------------|------------------------------------------------------------------|----------------------------------------------------------------|---------------------------------------------------------------|
| Empirical formula                      | C <sub>66</sub> H <sub>70</sub> Au <sub>2</sub> N <sub>6</sub> O | C <sub>56</sub> H <sub>50</sub> Au <sub>2</sub> N <sub>6</sub> | C <sub>21</sub> H <sub>27</sub> NO <sub>4</sub>               |
| Formula weight                         | 1357.21                                                          | 1200.96                                                        | 235.44                                                        |
| Temperature/K                          | 100(2)                                                           | 100(2)                                                         | 100(2)                                                        |
| Crystal system                         | triclinic                                                        | monoclinic                                                     | monoclinic                                                    |
| Space group                            | <i>P</i> -1                                                      | <i>C</i> 2/ <i>c</i>                                           | <i>P</i> 2 <sub>1</sub> / <i>n</i>                            |
| <i>a</i> /Å                            | 12.4705(2)                                                       | 27.2565(3)                                                     | 8.23200(10)                                                   |
| <i>b</i> /Å                            | 14.3086(3)                                                       | 17.0998(2)                                                     | 15.2361(2)                                                    |
| <i>c</i> /Å                            | 17.1528(3)                                                       | 52.0080(6)                                                     | 15.1326(2)                                                    |
| $\alpha$ /°                            | 103.775(2)                                                       | 90                                                             | 90                                                            |
| $\beta$ /°                             | 95.912(2)                                                        | 101.3770(10)                                                   | 90.3230(10)                                                   |
| $\gamma$ /°                            | 101.539(2)                                                       | 90                                                             | 90                                                            |
| Volume/Å <sup>3</sup>                  | 2875.84(10)                                                      | 23763.6(5)                                                     | 1897.96(4)                                                    |
| <i>Z</i>                               | 2                                                                | 20                                                             | 4                                                             |
| $\rho_{\text{calc}}$ /cm <sup>3</sup>  | 1.567                                                            | 1.678                                                          | 1.251                                                         |
| $\mu$ /mm <sup>-1</sup>                | 9.814                                                            | 6.211                                                          | 0.694                                                         |
| <i>F</i> (000)                         | 1348.0                                                           | 11720.0                                                        | 768.0                                                         |
| Crystal size/mm <sup>3</sup>           | 0.57 × 0.08 × 0.03                                               | 0.217 × 0.114 × 0.103                                          | 0.302 × 0.227 × 0.122                                         |
| Radiation                              | Cu K $\alpha$ ( $\lambda$ = 1.54184 Å)                           | Mo K $\alpha$ ( $\lambda$ = 0.71073 Å)                         | Cu K $\alpha$ ( $\lambda$ = 1.54184 Å)                        |
| 2 $\theta$ range for data collection/° | 5.372 to 147.72                                                  | 5.026 to 57.526                                                | 8.236 to 147.91                                               |
| Index ranges                           | -12 ≤ <i>h</i> ≤ 15, -17 ≤ <i>k</i> ≤ 17, -21 ≤ <i>l</i> ≤ 21    | -36 ≤ <i>h</i> ≤ 32, -22 ≤ <i>k</i> ≤ 22, -69 ≤ <i>l</i> ≤ 65  | -9 ≤ <i>h</i> ≤ 10, -18 ≤ <i>k</i> ≤ 18, -18 ≤ <i>l</i> ≤ 18  |
| Reflections collected                  | 49365                                                            | 123620                                                         | 18693                                                         |
| Independent reflections                | 11431 [R <sub>int</sub> = 0.0631, R <sub>sigma</sub> = 0.0515]   | 26919 [R <sub>int</sub> = 0.0723, R <sub>sigma</sub> = 0.0749] | 3800 [R <sub>int</sub> = 0.0266, R <sub>sigma</sub> = 0.0181] |

## SUPPORTING INFORMATION

---

|                                                |                                  |                                  |                                  |
|------------------------------------------------|----------------------------------|----------------------------------|----------------------------------|
| Data/restraints/parameters                     | 11431/0/639                      | 26919/0/1457                     | 3800/6/254                       |
| Goodness-of-fit on $F^2$                       | 1.008                            | 1.031                            | 1.053                            |
| Final R indexes [ $I \geq 2\sigma(I)$ ]        | $R_1 = 0.0391$ , $wR_2 = 0.0823$ | $R_1 = 0.0583$ , $wR_2 = 0.0932$ | $R_1 = 0.0457$ , $wR_2 = 0.1116$ |
| Final R indexes [all data]                     | $R_1 = 0.0574$ , $wR_2 = 0.0892$ | $R_1 = 0.0842$ , $wR_2 = 0.1014$ | $R_1 = 0.0535$ , $wR_2 = 0.1180$ |
| Largest diff. peak/hole / $e \text{ \AA}^{-3}$ | 2.06/-1.17                       | 2.01/-1.37                       | 0.49/-0.28                       |



# SUPPORTING INFORMATION

## NMR spectra

### $^1\text{H}$ and $^{13}\text{C}$ NMR of [IPr<sup>o</sup>-aryl-2HBr] **1a**

xim a  
nm-467  
protn\_icon CDCl3 (D:\vd\sp\spn300) spnxima 3

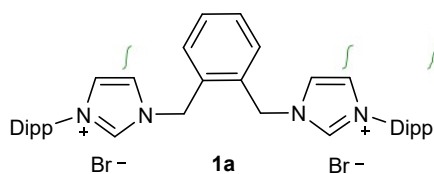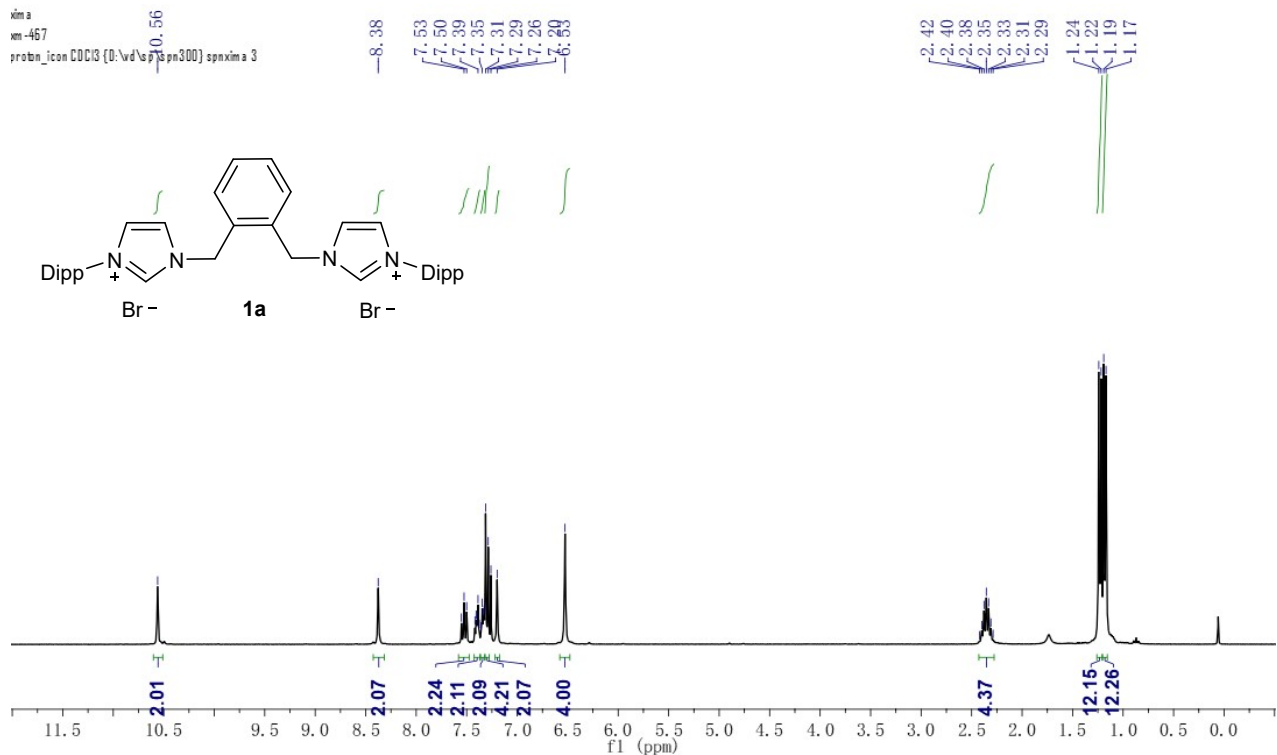

xim a  
apt\_t\_icon CDCl3 (D:\vd\sp\spn300) DPE300 52

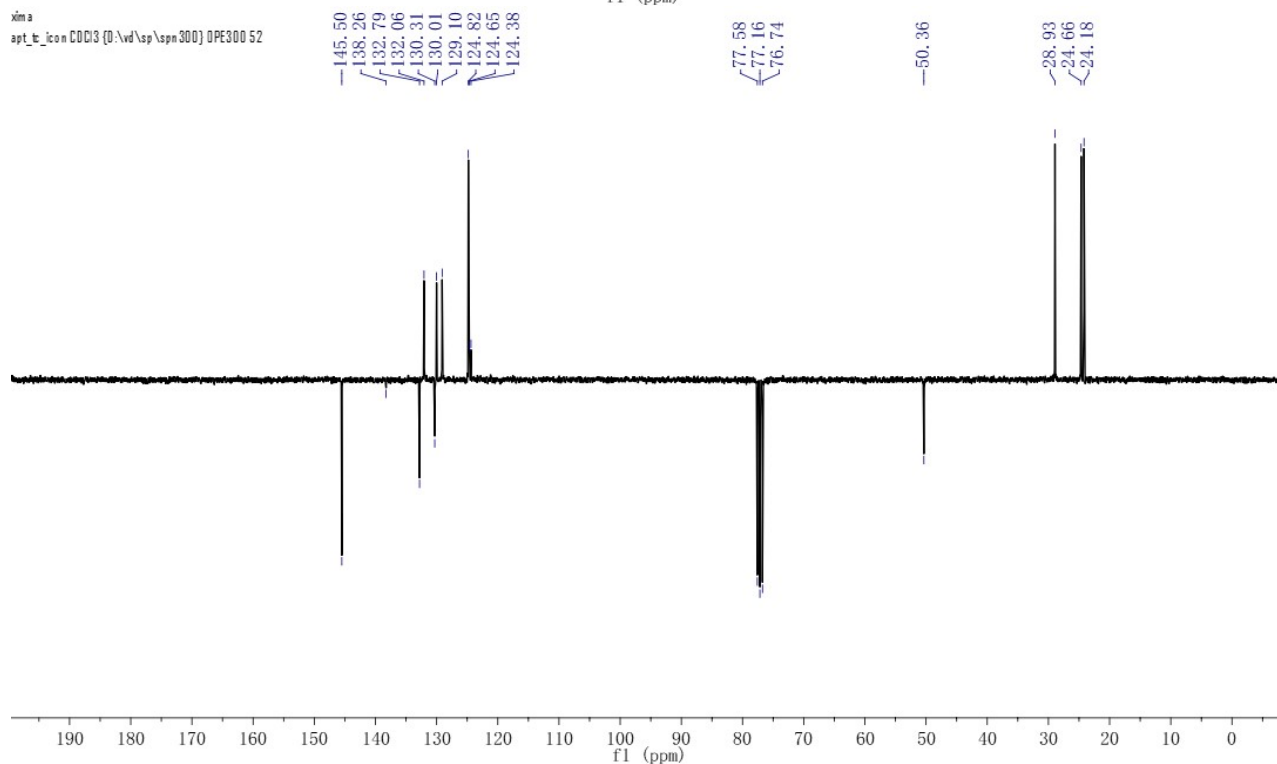

# SUPPORTING INFORMATION

## $^1\text{H}$ and $^{13}\text{C}$ $\{^1\text{H}\}$ apt NMR of $[\text{IPr}^{m\text{-aryl}}\cdot 2\text{HBr}] \mathbf{1b}$

xima  
xm-474  
probin\_icon DMSO (D:\vd\sp\spn400) spnxpha 33

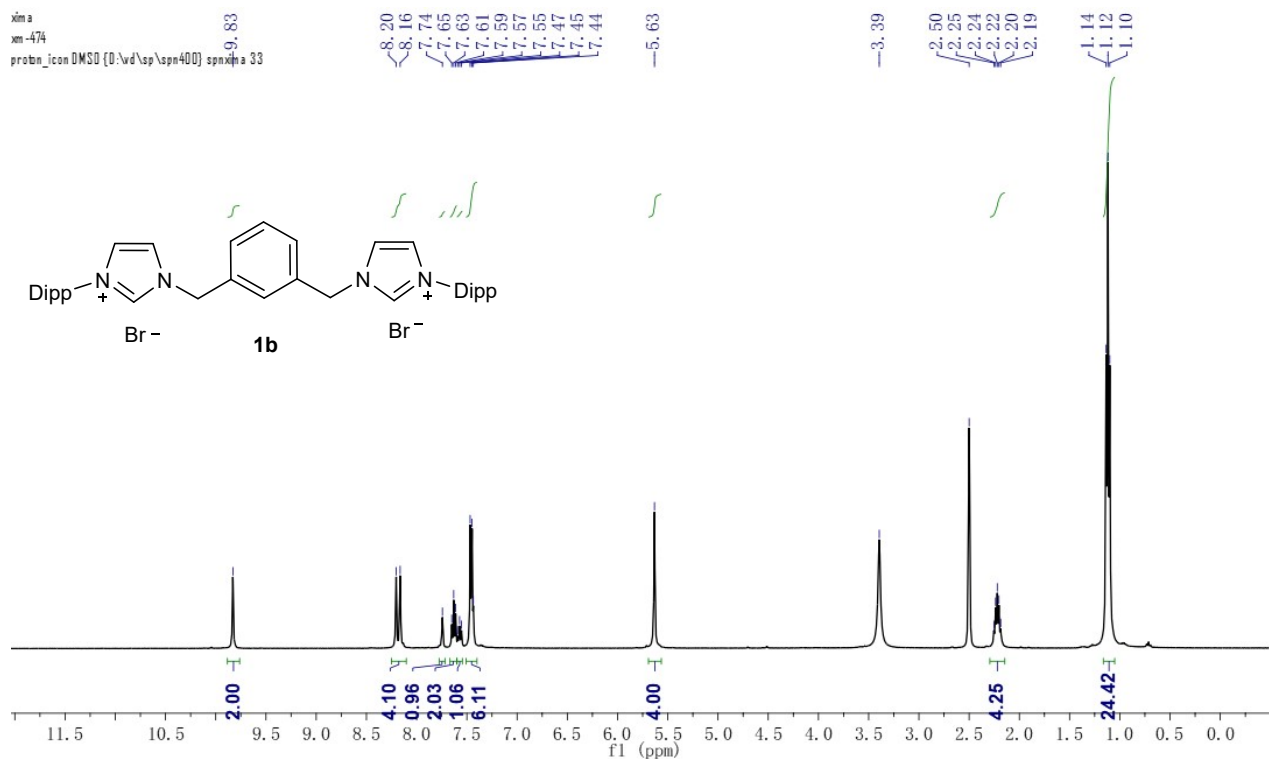

xima  
apt\_icon DMSO (D:\vd\sp\spn400) ope400 15

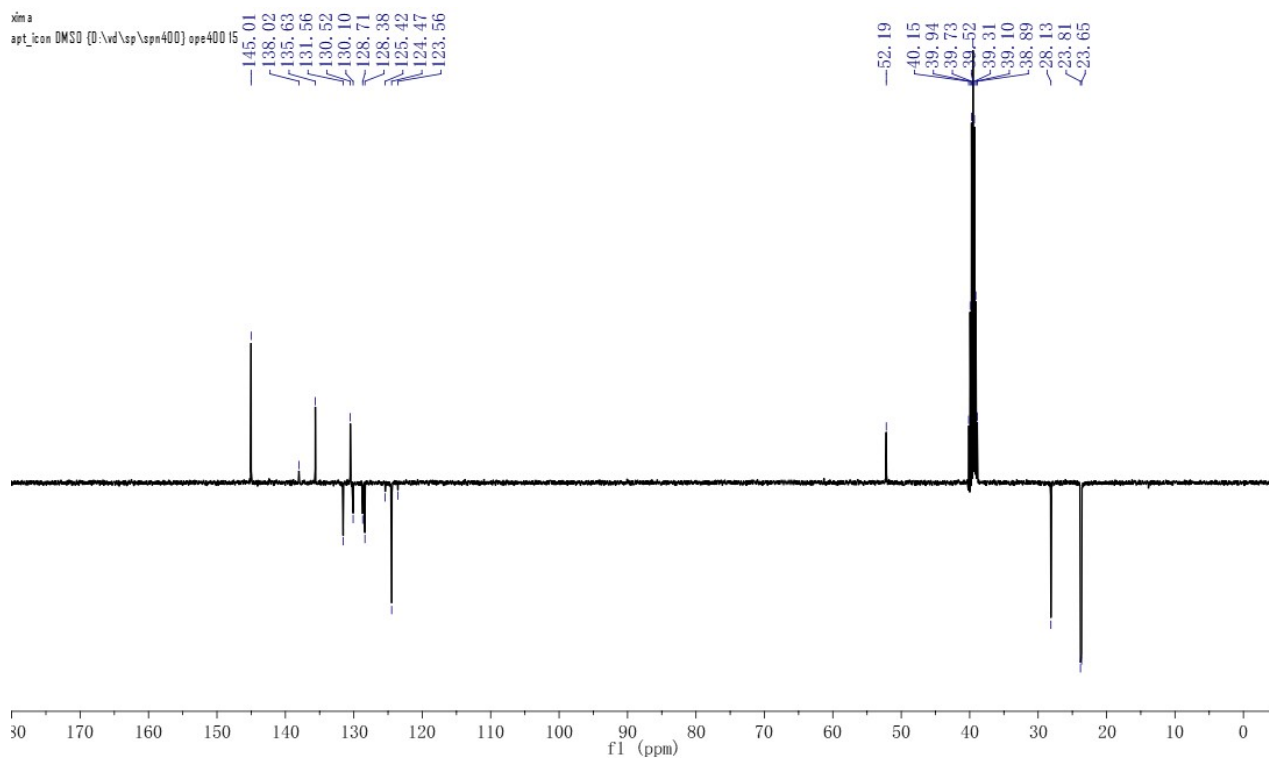

# SUPPORTING INFORMATION

## $^1\text{H}$ and $^{13}\text{C}$ $\{^1\text{H}\}$ apt NMR of $[\text{IPr}^{p\text{-aryl}}\cdot 2\text{HBr}] \mathbf{1c}$

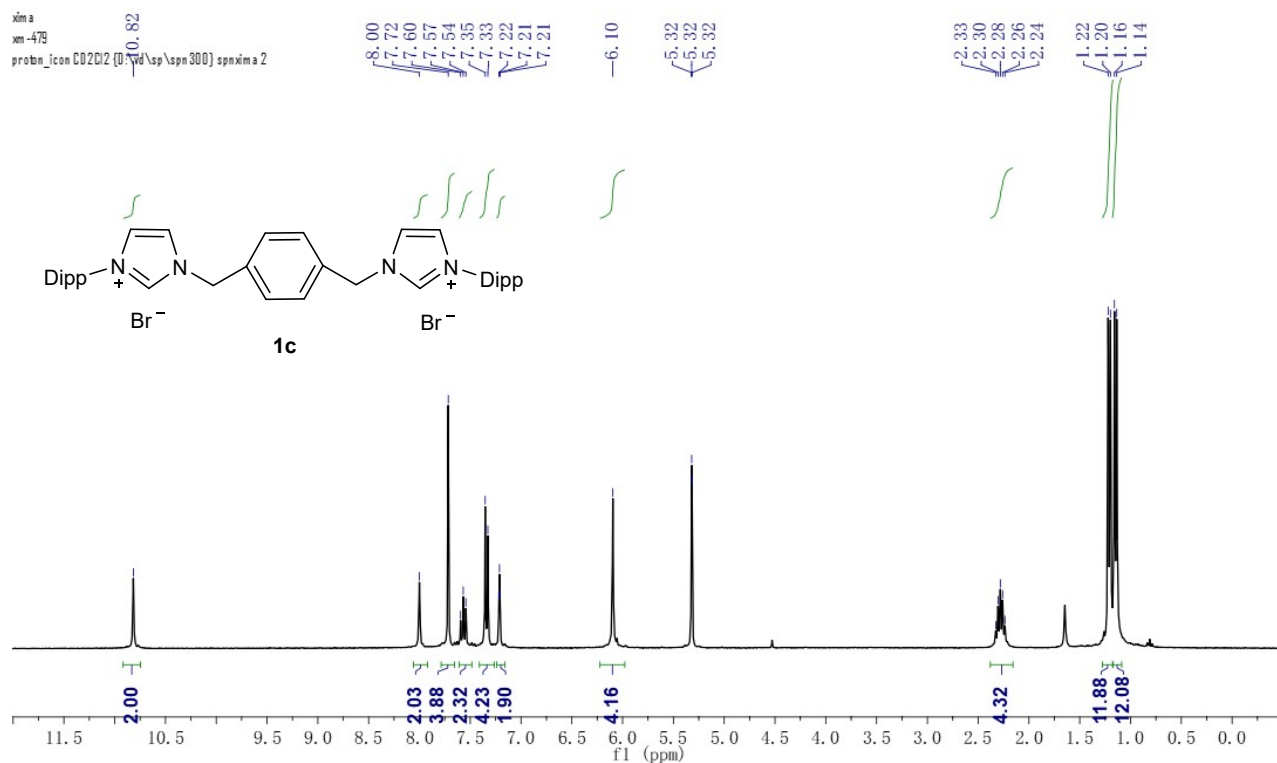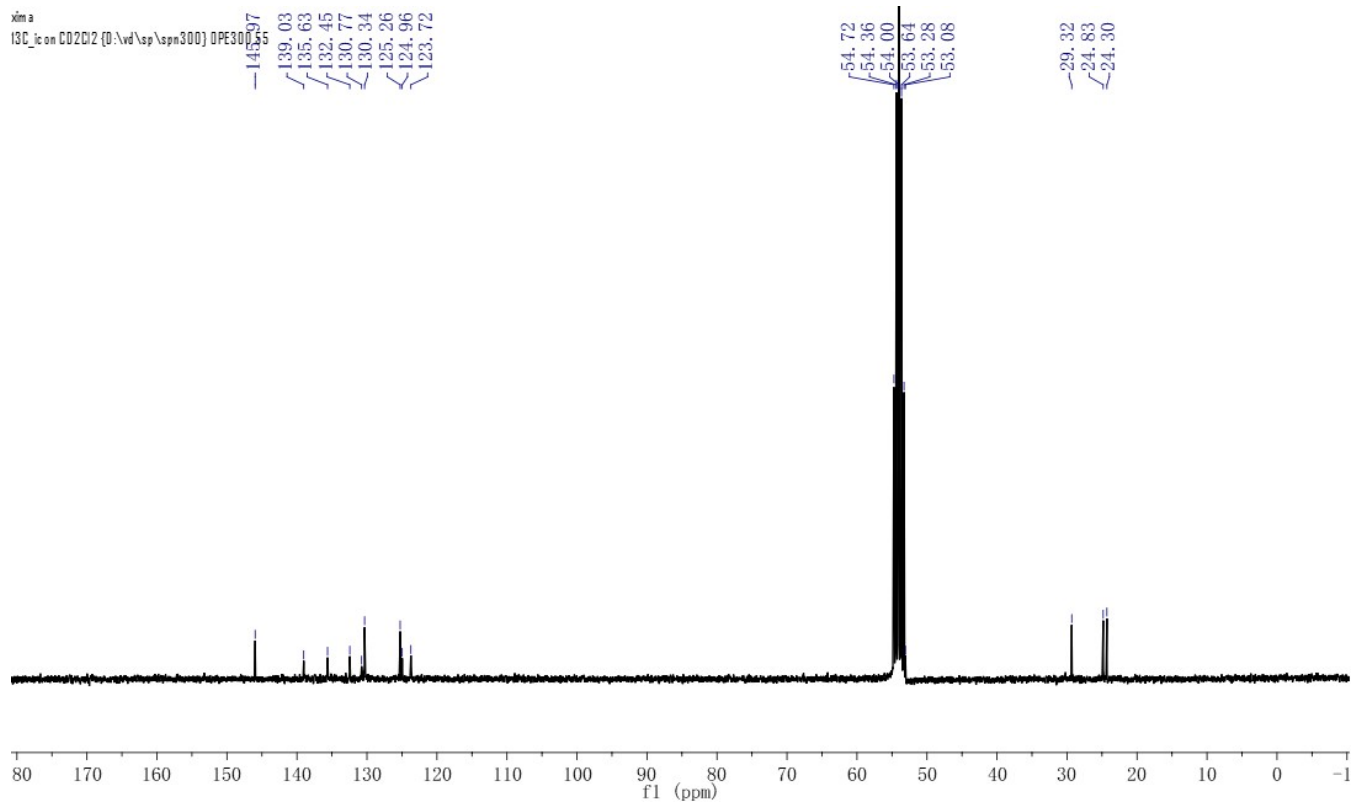

# SUPPORTING INFORMATION

## $^1\text{H}$ and $^{13}\text{C}$ $\{^1\text{H}\}$ NMR of [IMes<sup>o</sup>-aryl-2HBr] **1d**

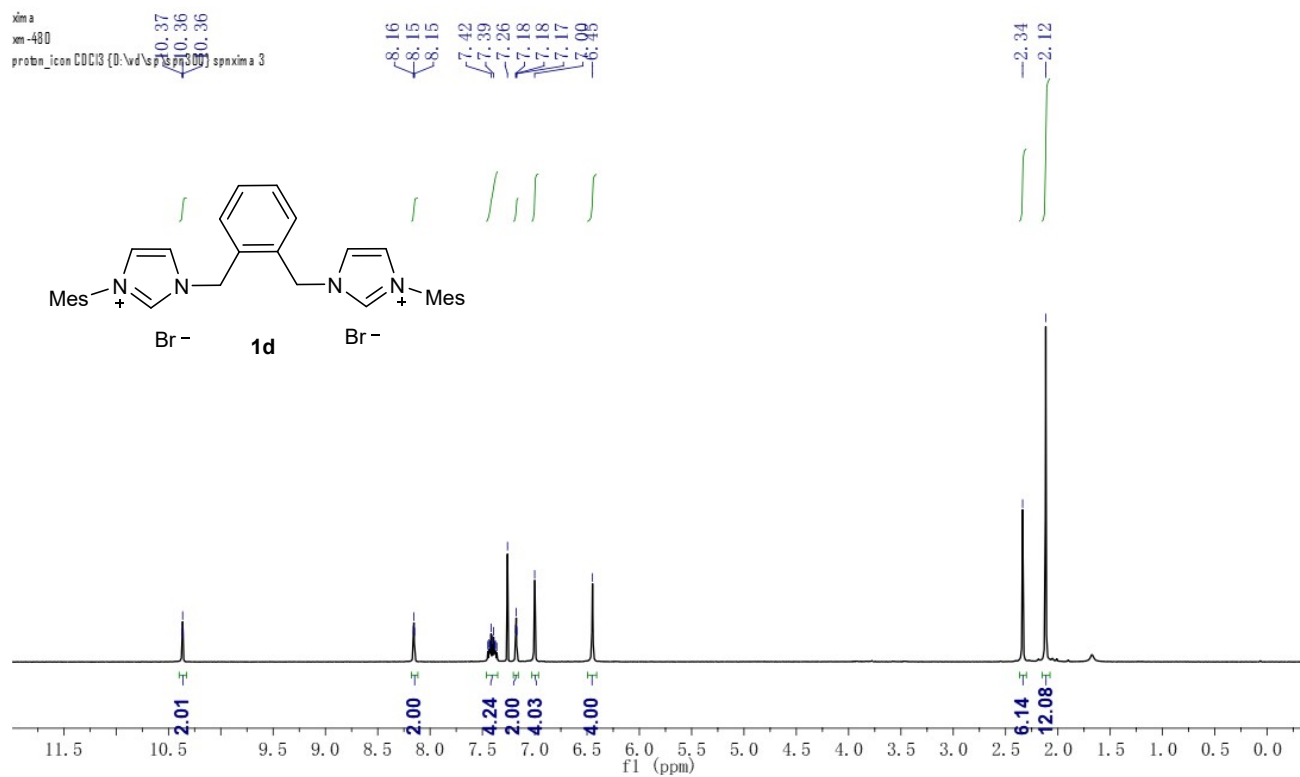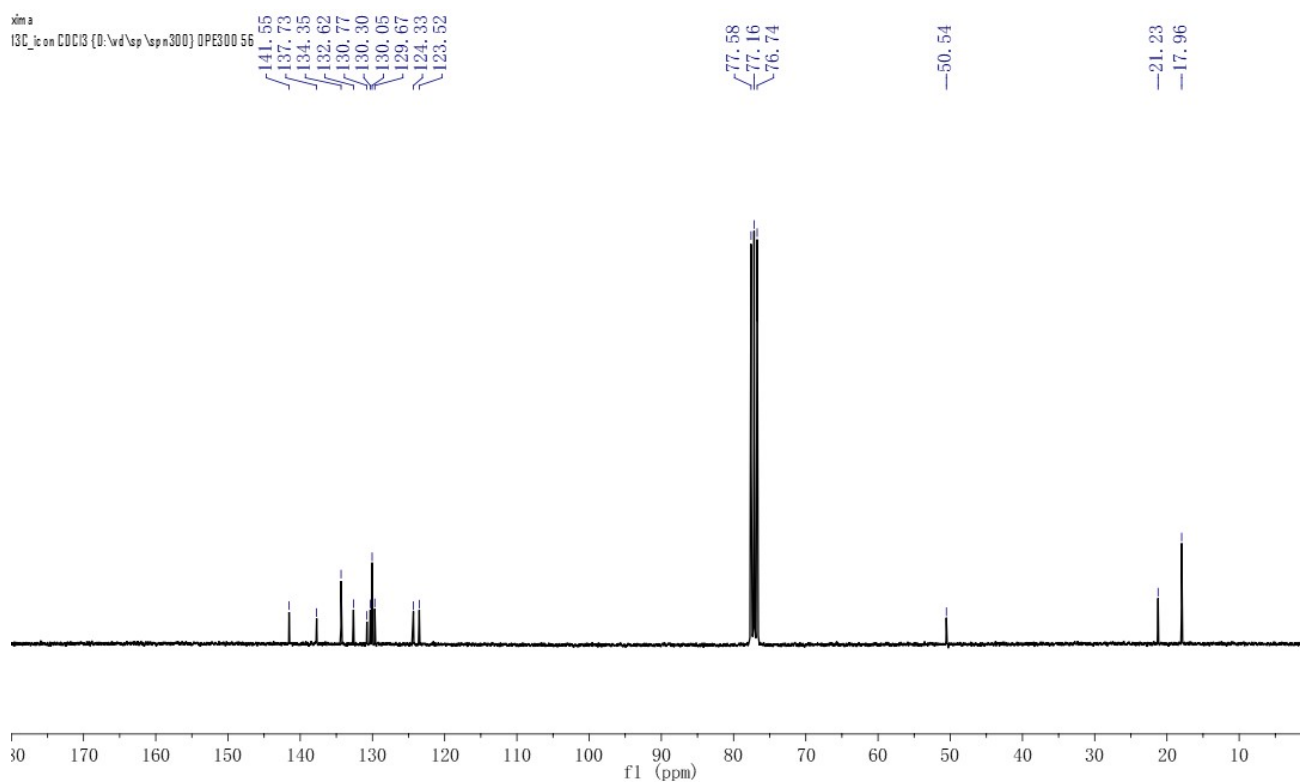

# SUPPORTING INFORMATION

## $^1\text{H}$ and $^{13}\text{C}$ $\{^1\text{H}\}$ NMR of $[\text{IMes}^{m\text{-aryl}}\cdot 2\text{HBr}]$ **1e**

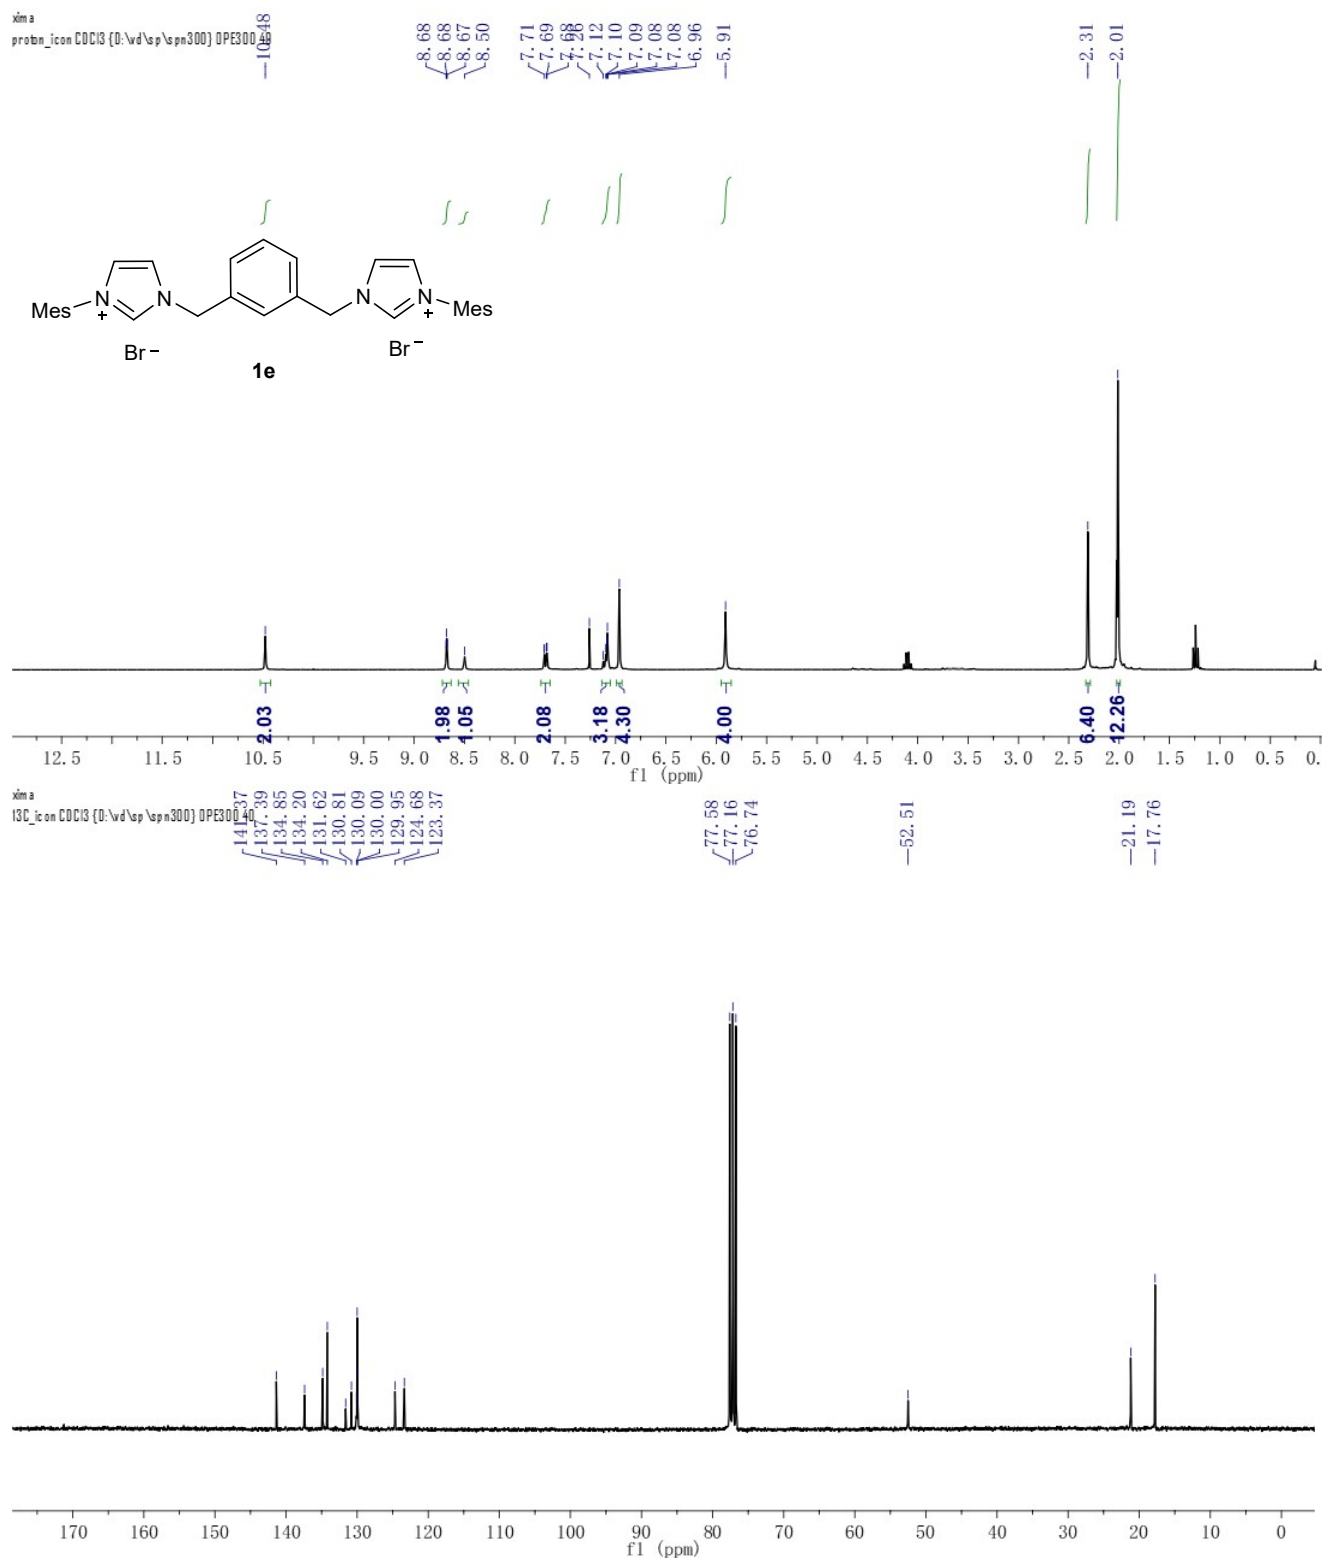

# SUPPORTING INFORMATION

## 1H and 13C {1H} NMR of [IMes-*p*-aryl-2HBr] 1f

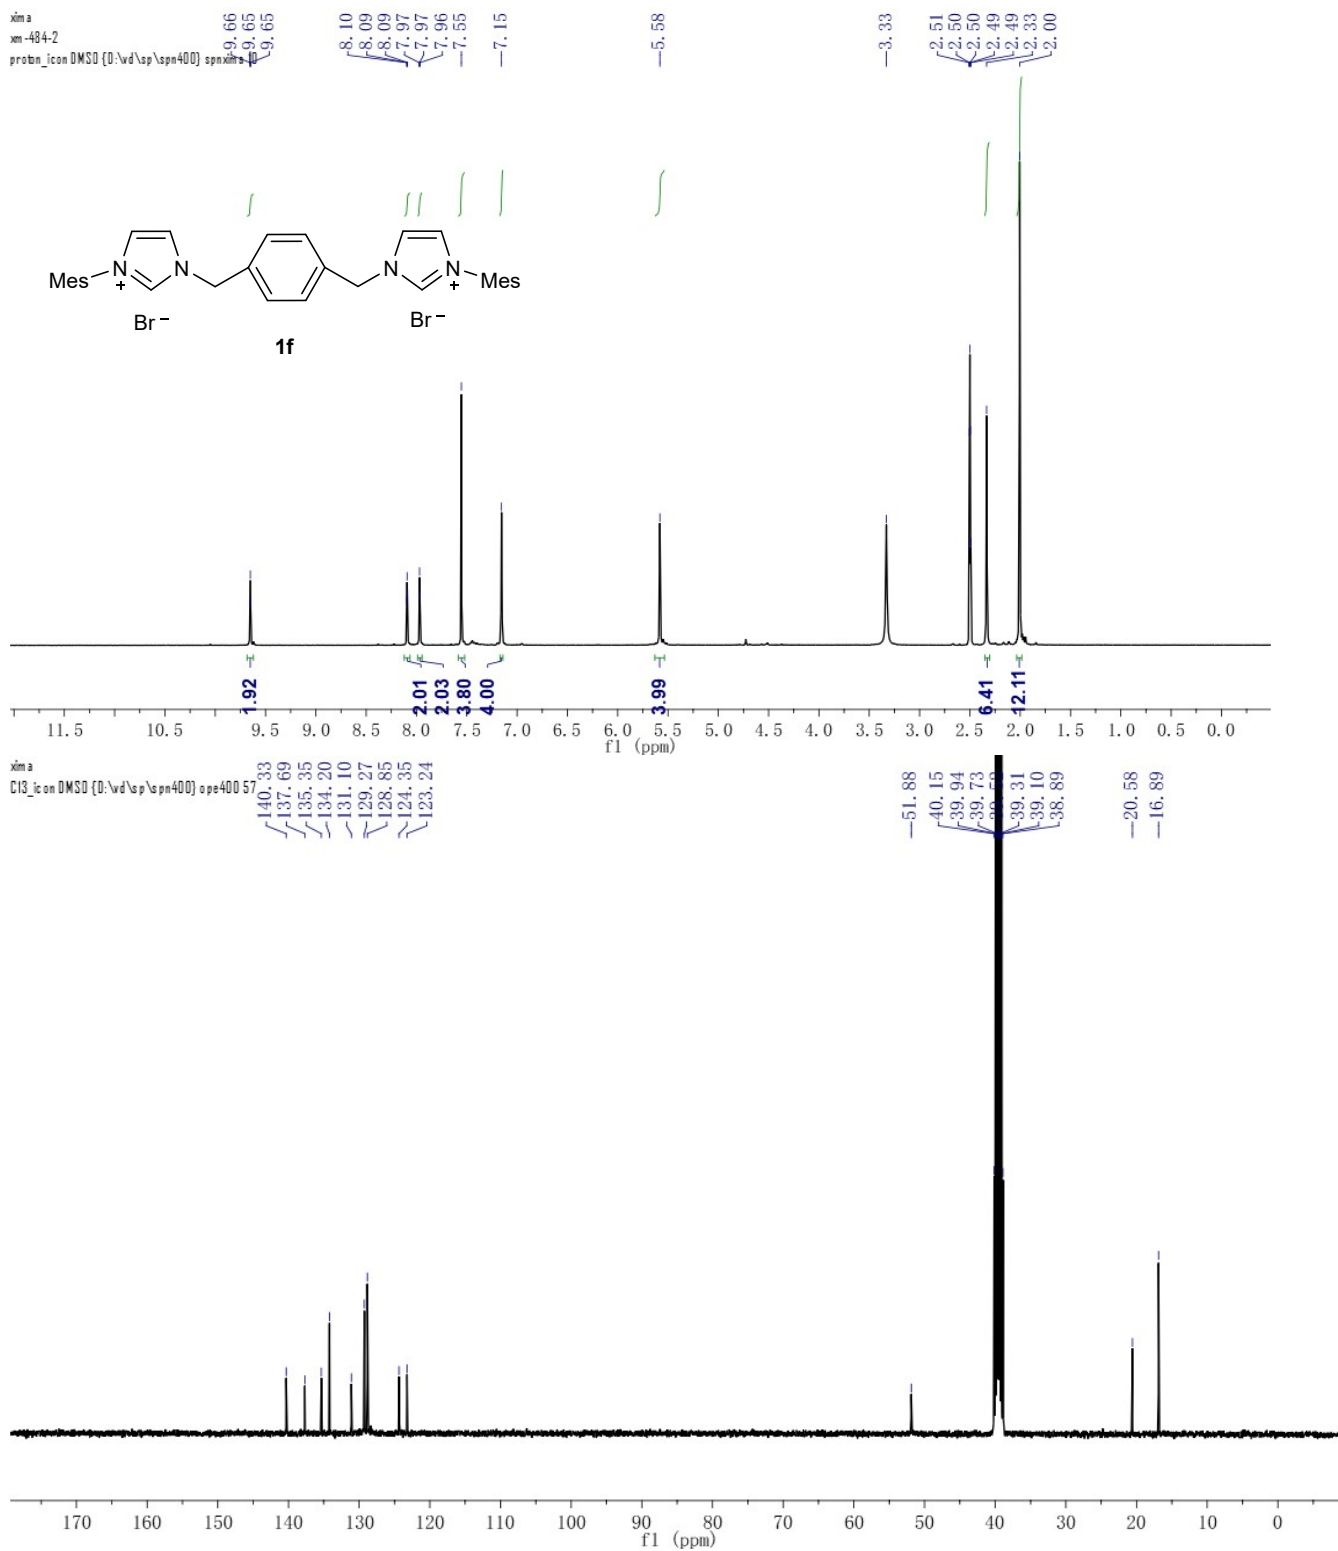

# SUPPORTING INFORMATION

## $^1\text{H}$ and $^{13}\text{C}$ $\{^1\text{H}\}$ apt NMR of [IMe-*o*-aryl $\cdot$ 2HBr] **1g**

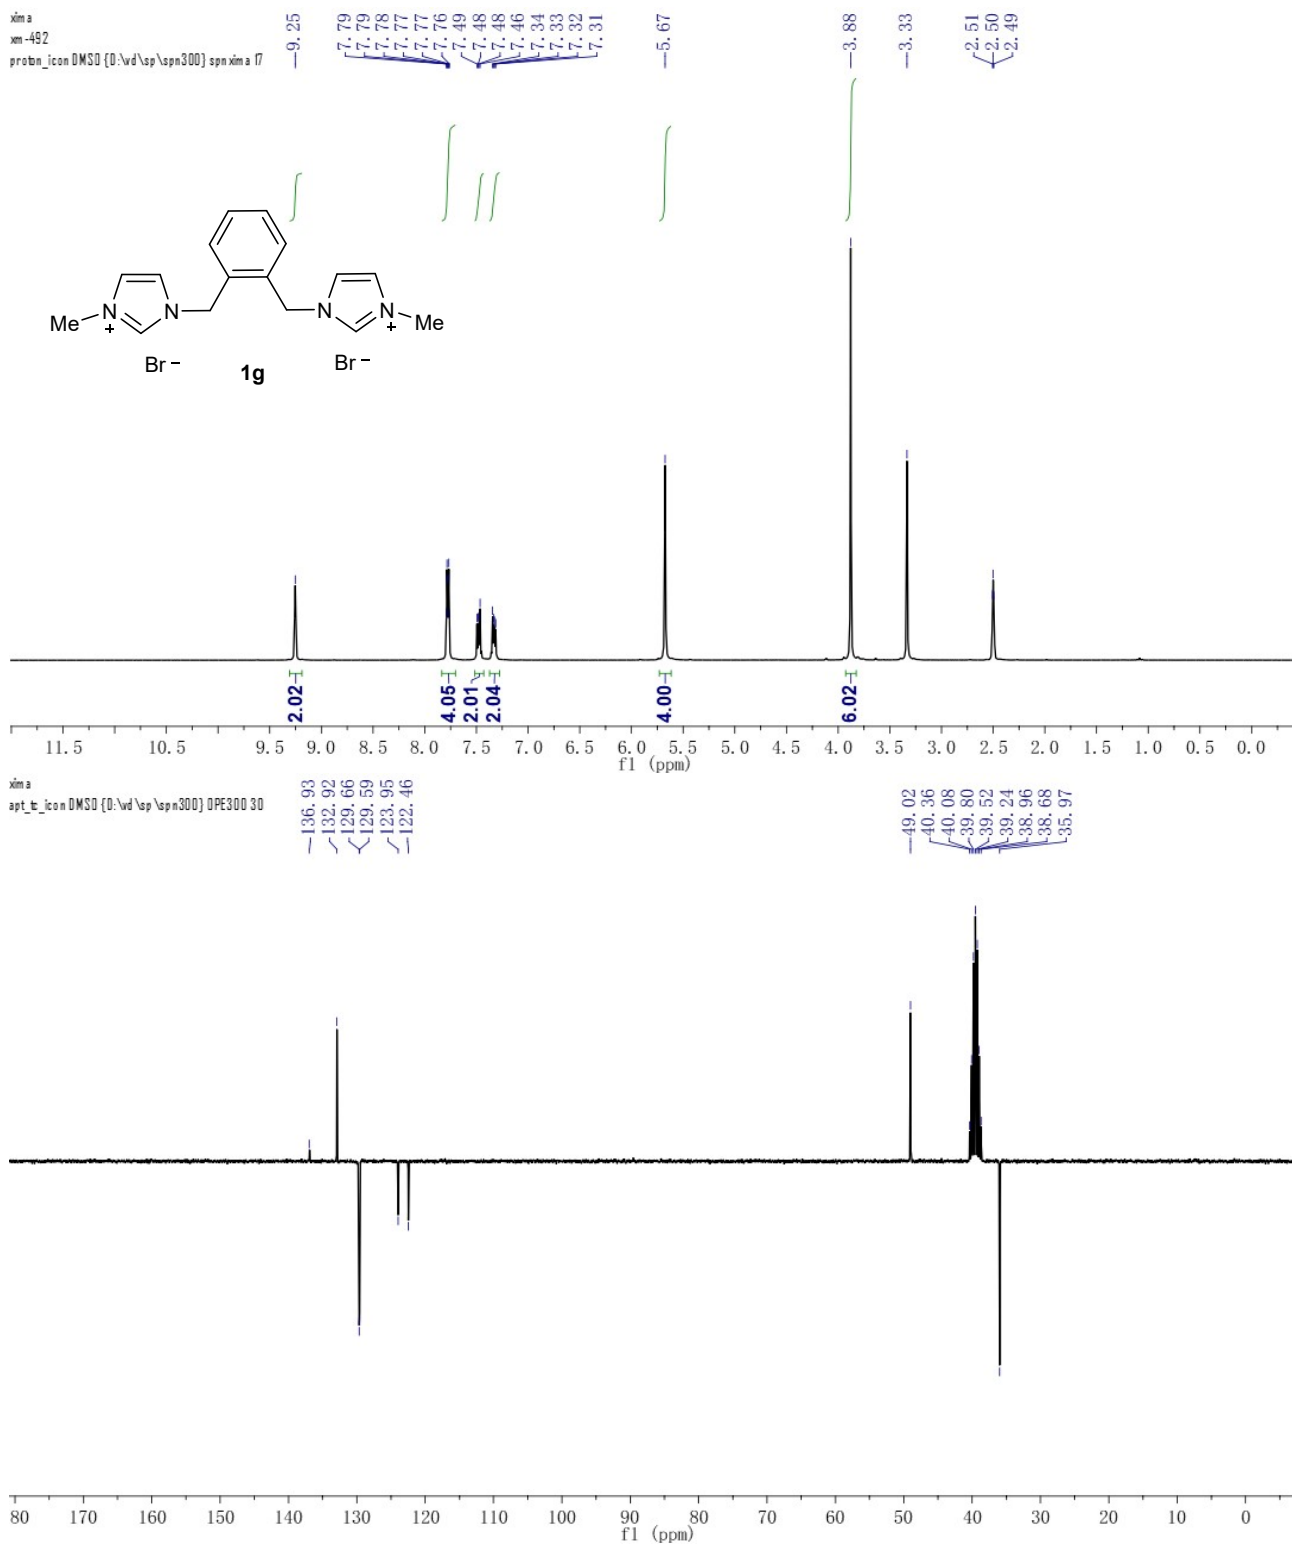

# SUPPORTING INFORMATION

## $^1\text{H}$ and $^{13}\text{C}$ $\{^1\text{H}\}$ NMR of $[\text{IPr}^{\text{o-aryl}}\{\text{AuBr}\}_2] \mathbf{2a}$

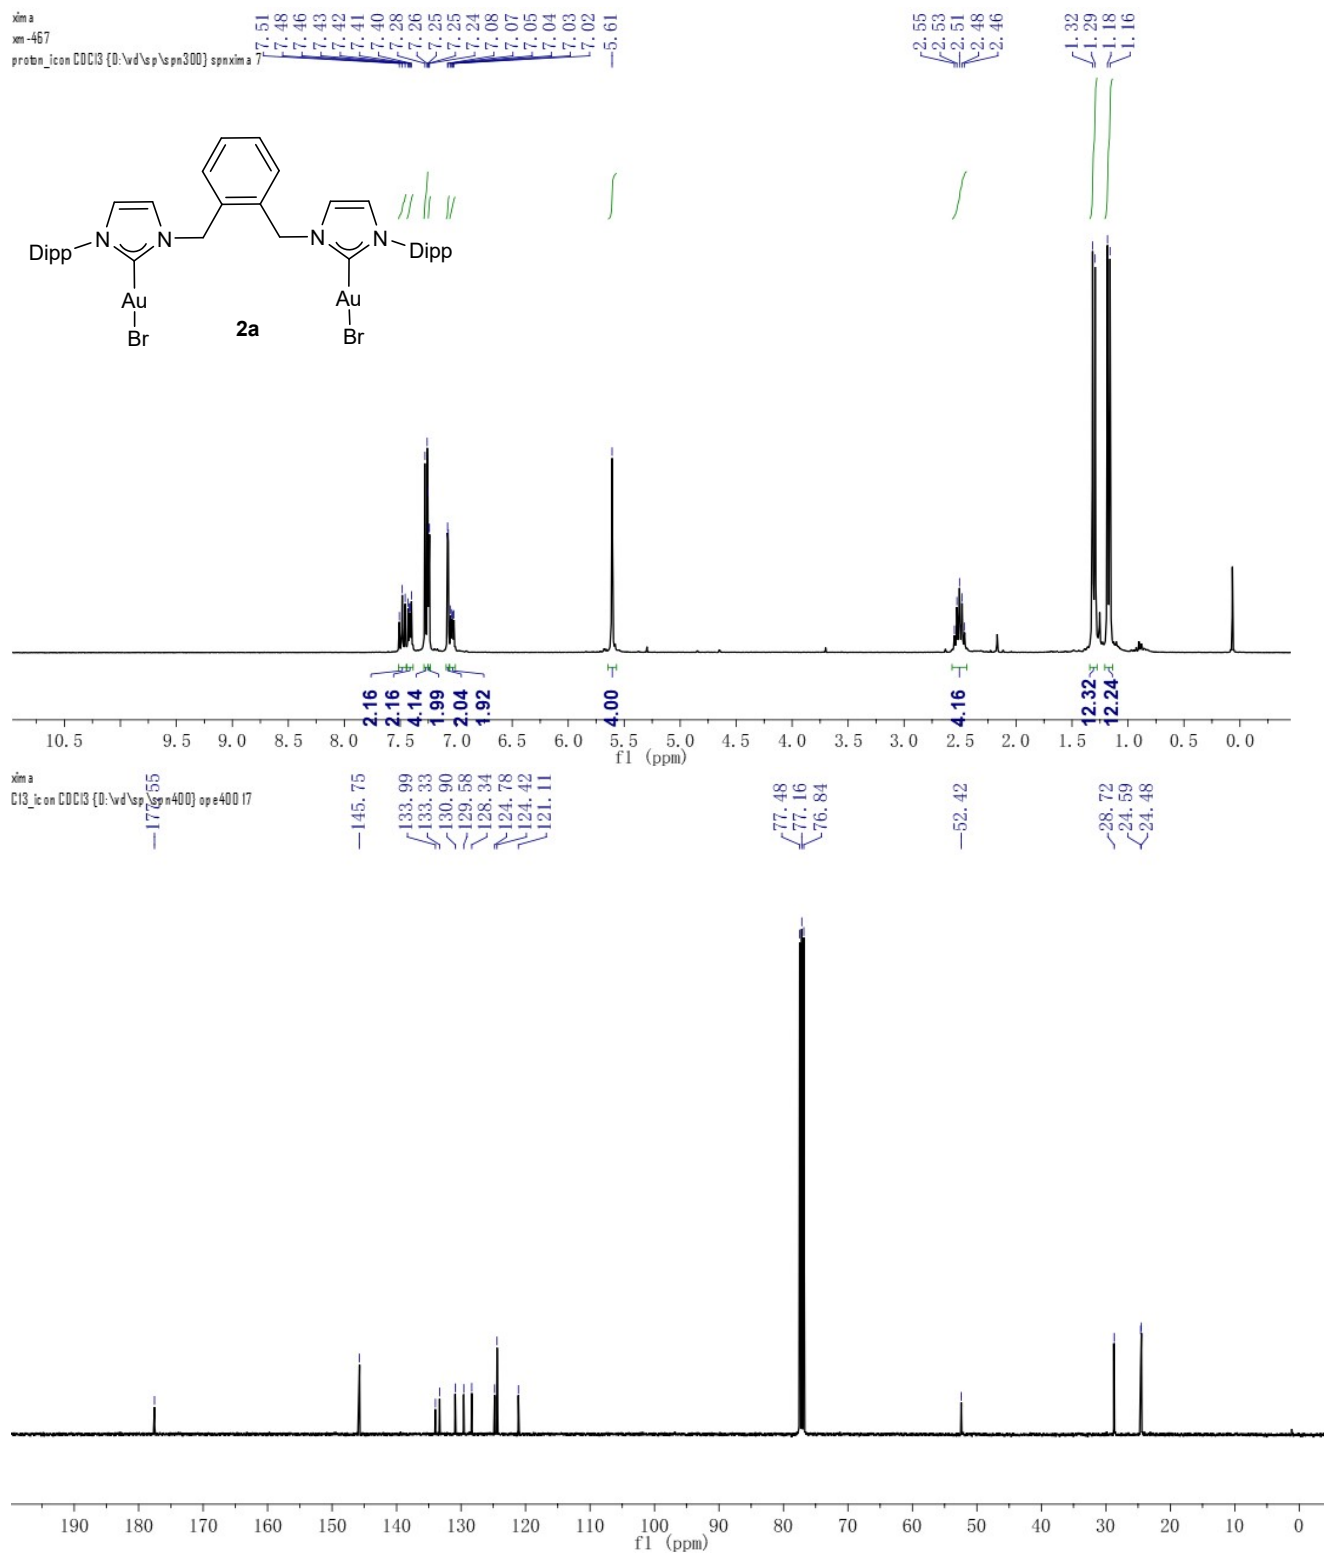



# SUPPORTING INFORMATION

## $^1\text{H}$ and $^{13}\text{C}$ $\{^1\text{H}\}$ NMR of $[\text{IPr}^m\text{-aryl}\{\text{AuBr}\}_2]$ **2b**

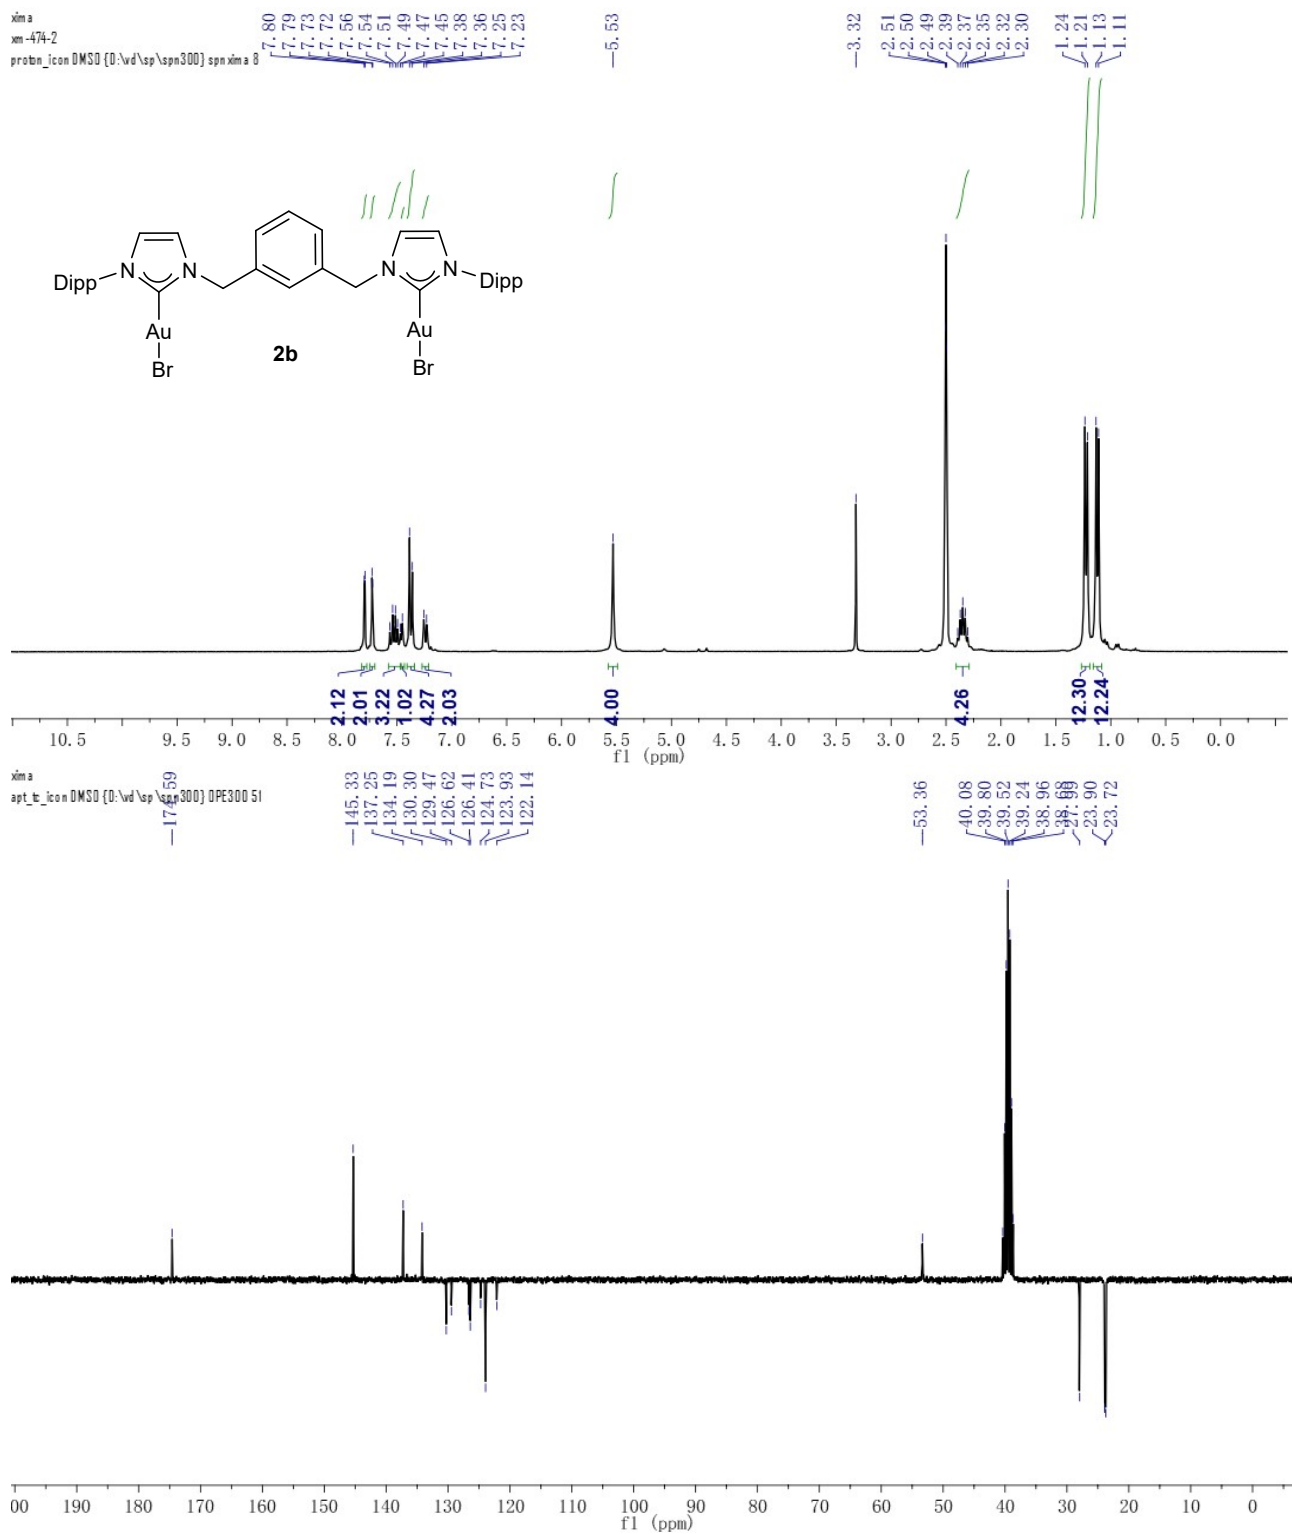

# SUPPORTING INFORMATION

## $^1\text{H}$ and $^{13}\text{C}$ $\{^1\text{H}\}$ apt NMR of $[\text{IMes-}o\text{-aryl}\{\text{AuBr}\}_2]$ **2d**

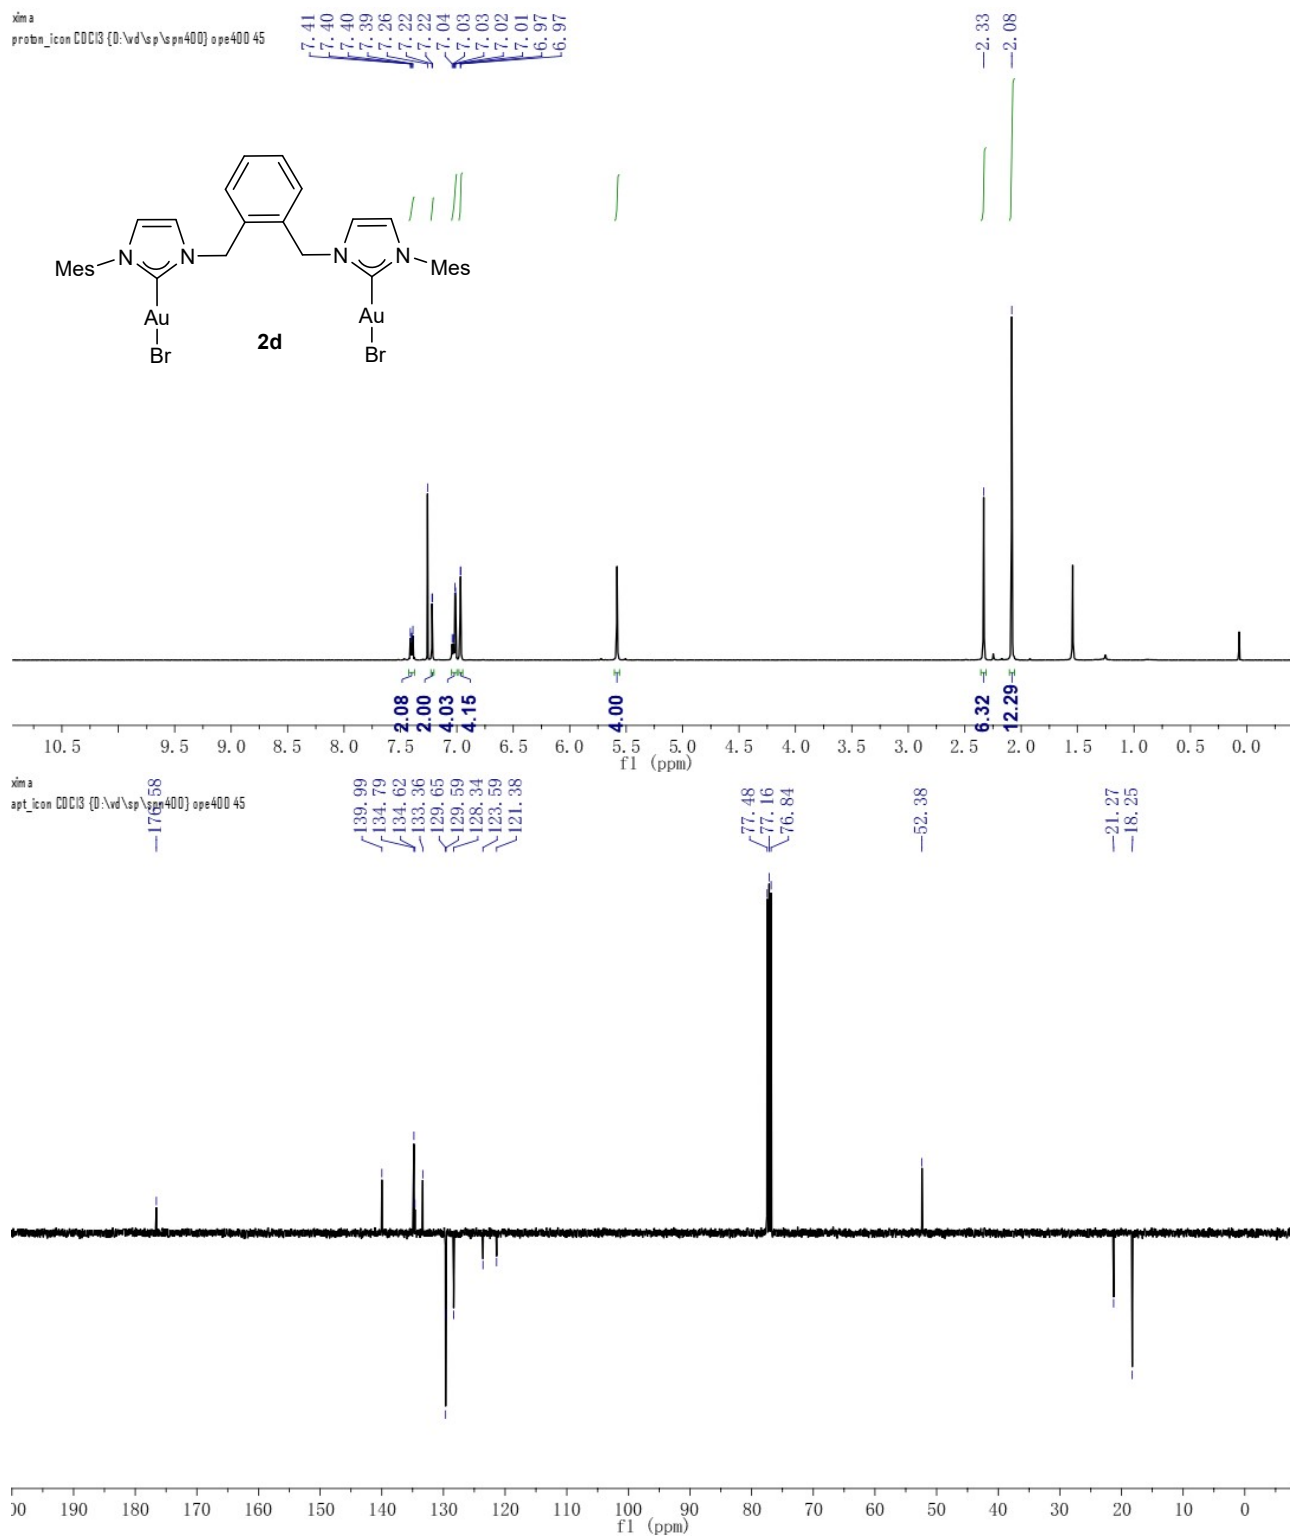

# SUPPORTING INFORMATION

## $^1\text{H}$ and $^{13}\text{C}$ $\{^1\text{H}\}$ apt NMR of $[\text{IMes}^{m\text{-aryl}}\{\text{AuBr}\}_2]$ **2e**

xim a  
xm-486-2  
probn\_icon CD2D12 (0-\vd\sp\spn300) spnxima 10

7.49  
7.46  
7.44  
7.44  
7.36  
7.35  
7.33  
7.27  
7.27  
7.04  
6.97  
5.51  
5.32  
5.32

-2.37  
-2.05

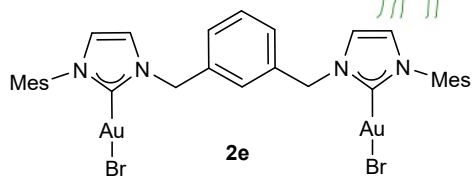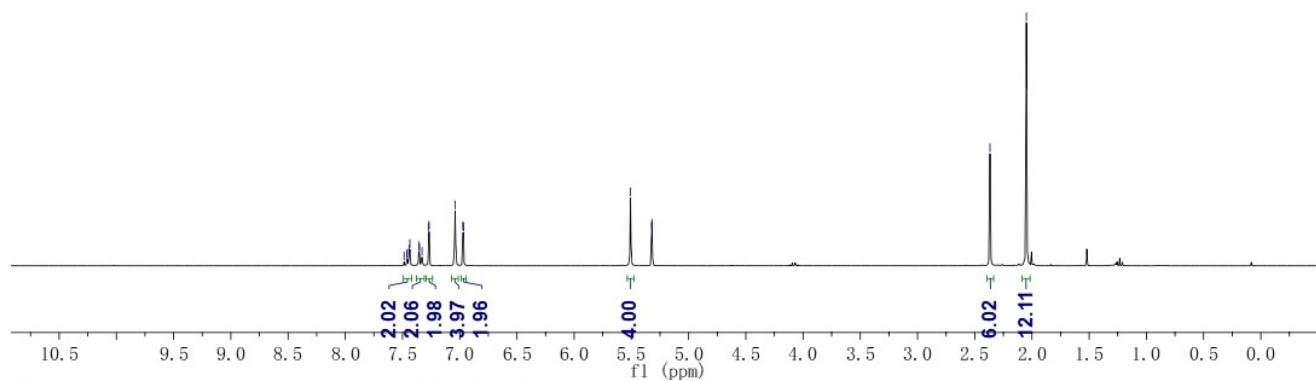

xim a  
apt\_t\_icon CD2C12 (0-\vd\sp\spn300) DPE300 42

176.35  
140.49  
137.21  
135.45  
135.37  
130.55  
129.85  
128.27  
127.97  
123.43  
121.77

55.15  
54.72  
54.36  
54.00  
53.64  
53.28

-21.48  
-18.23

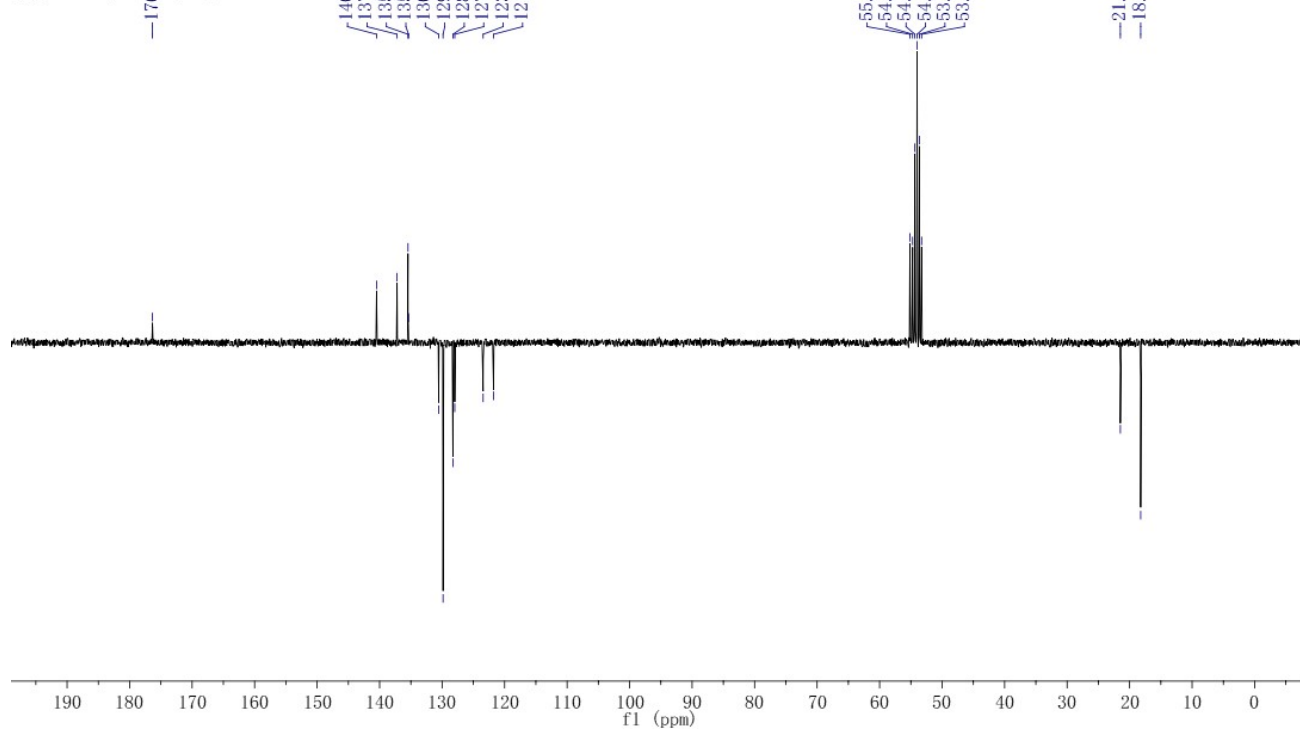

# SUPPORTING INFORMATION

## $^1\text{H}$ and $^{13}\text{C}$ $\{^1\text{H}\}$ NMR of $[\text{IMes-}p\text{-aryl}\{\text{AuBr}\}_2]$ **2f**

xim a  
probn\_1con DMSO (D:\vd\sp\spn300) DPE300 4f

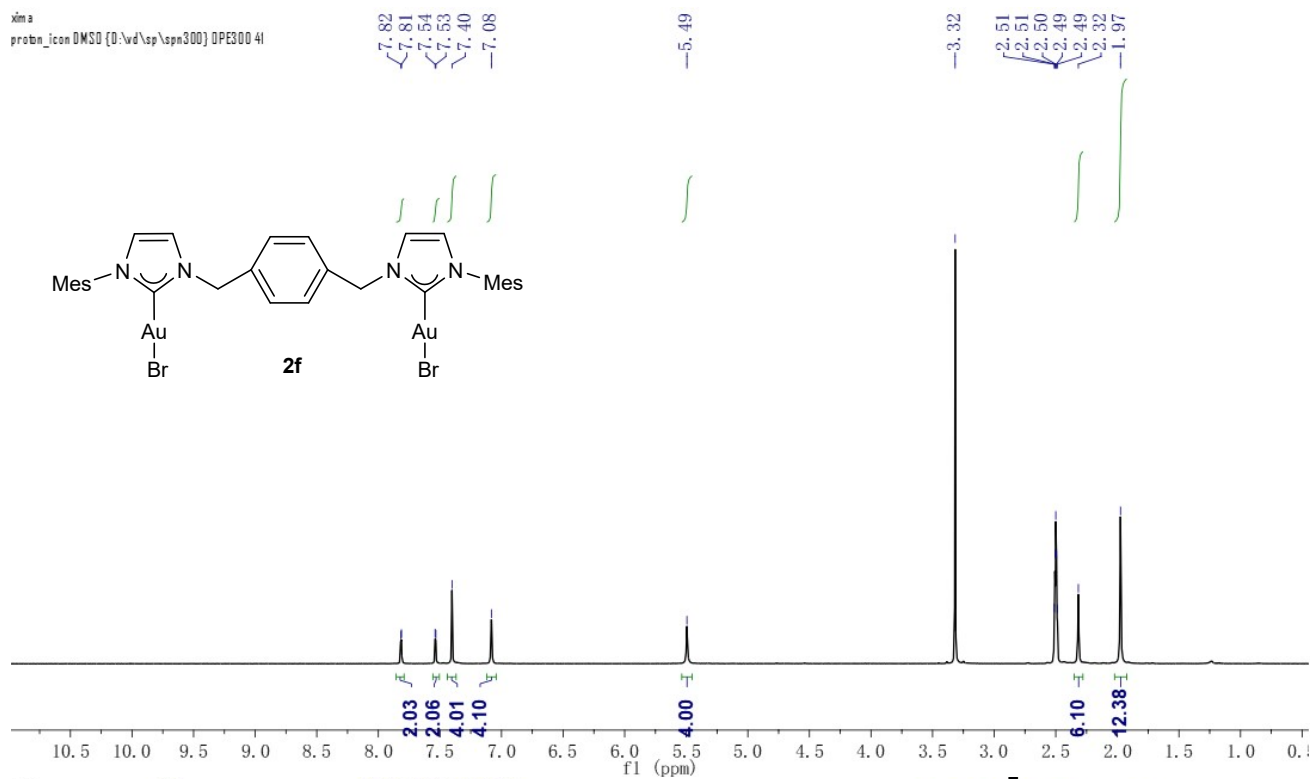

xim a  
13C\_1con DMSO (D:\vd\sp\spn300) DPE300 4f

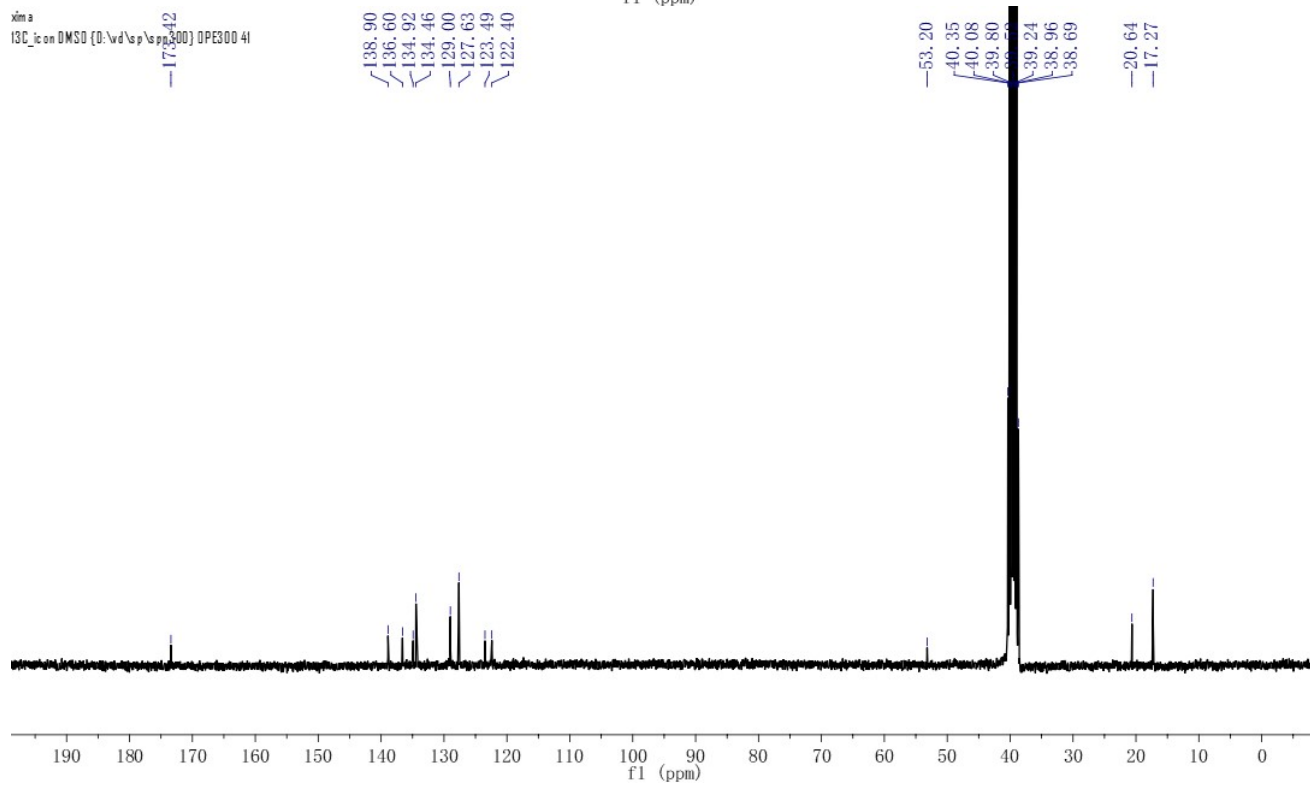

# SUPPORTING INFORMATION

## $^1\text{H}$ and $^{13}\text{C}$ $\{^1\text{H}\}$ apt NMR of $[\text{Ime-aryl}\{\text{AuBr}\}_2]$ **2g**

xim a  
PROTON DMSO (D:\vd\asp\apn300) DPE300 8

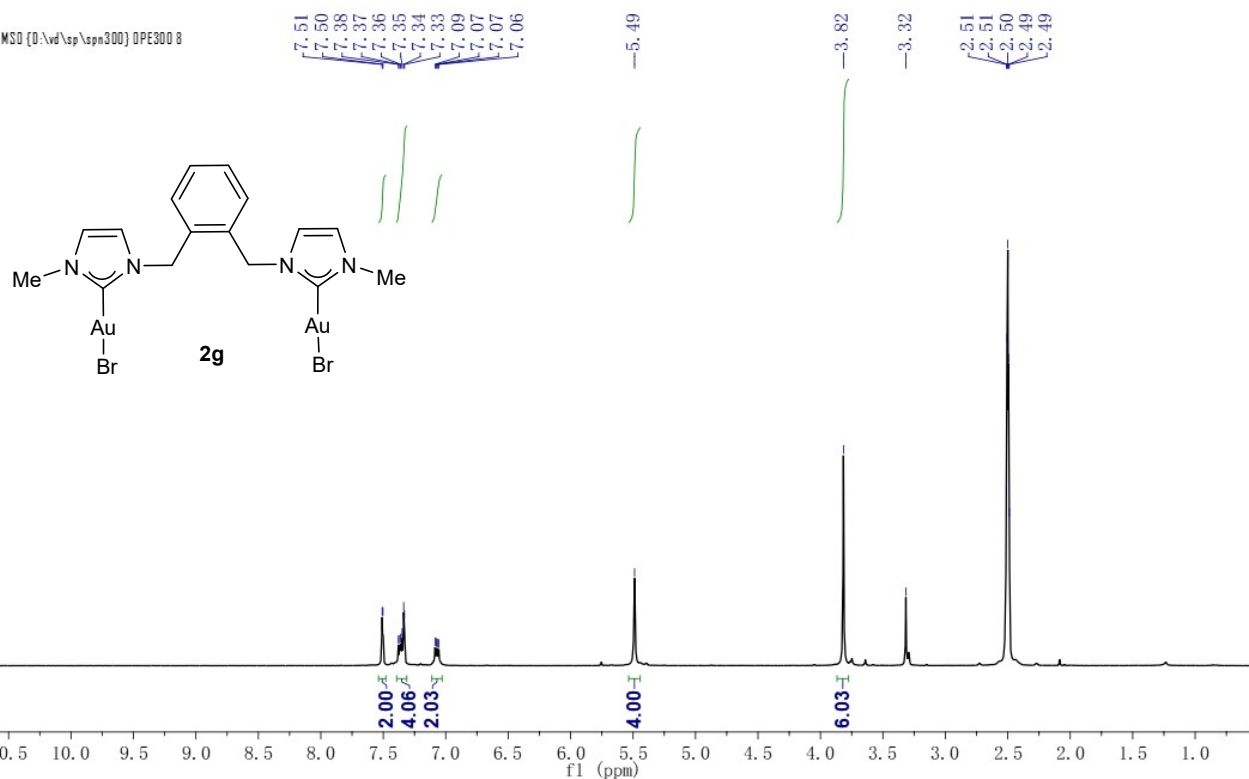

xim a  
apt\_t\_1con DMSO (D:\vd\asp\apn300) DPE300 8

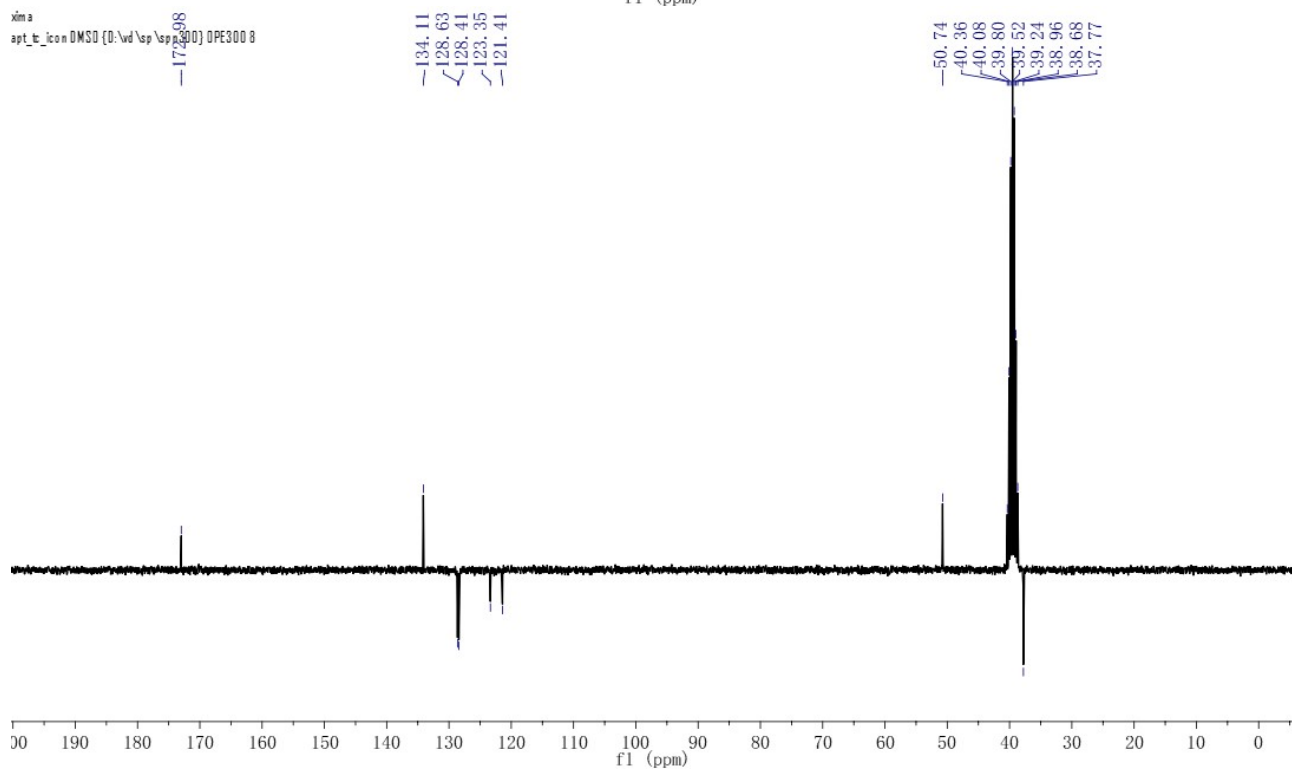

# SUPPORTING INFORMATION

## $^1\text{H}$ and $^{13}\text{C}$ $\{^1\text{H}\}$ apt NMR of $[\text{IPr}^{\text{o-aryl}}\{\text{Au}(\text{Cbz})\}_2]$ **3a**

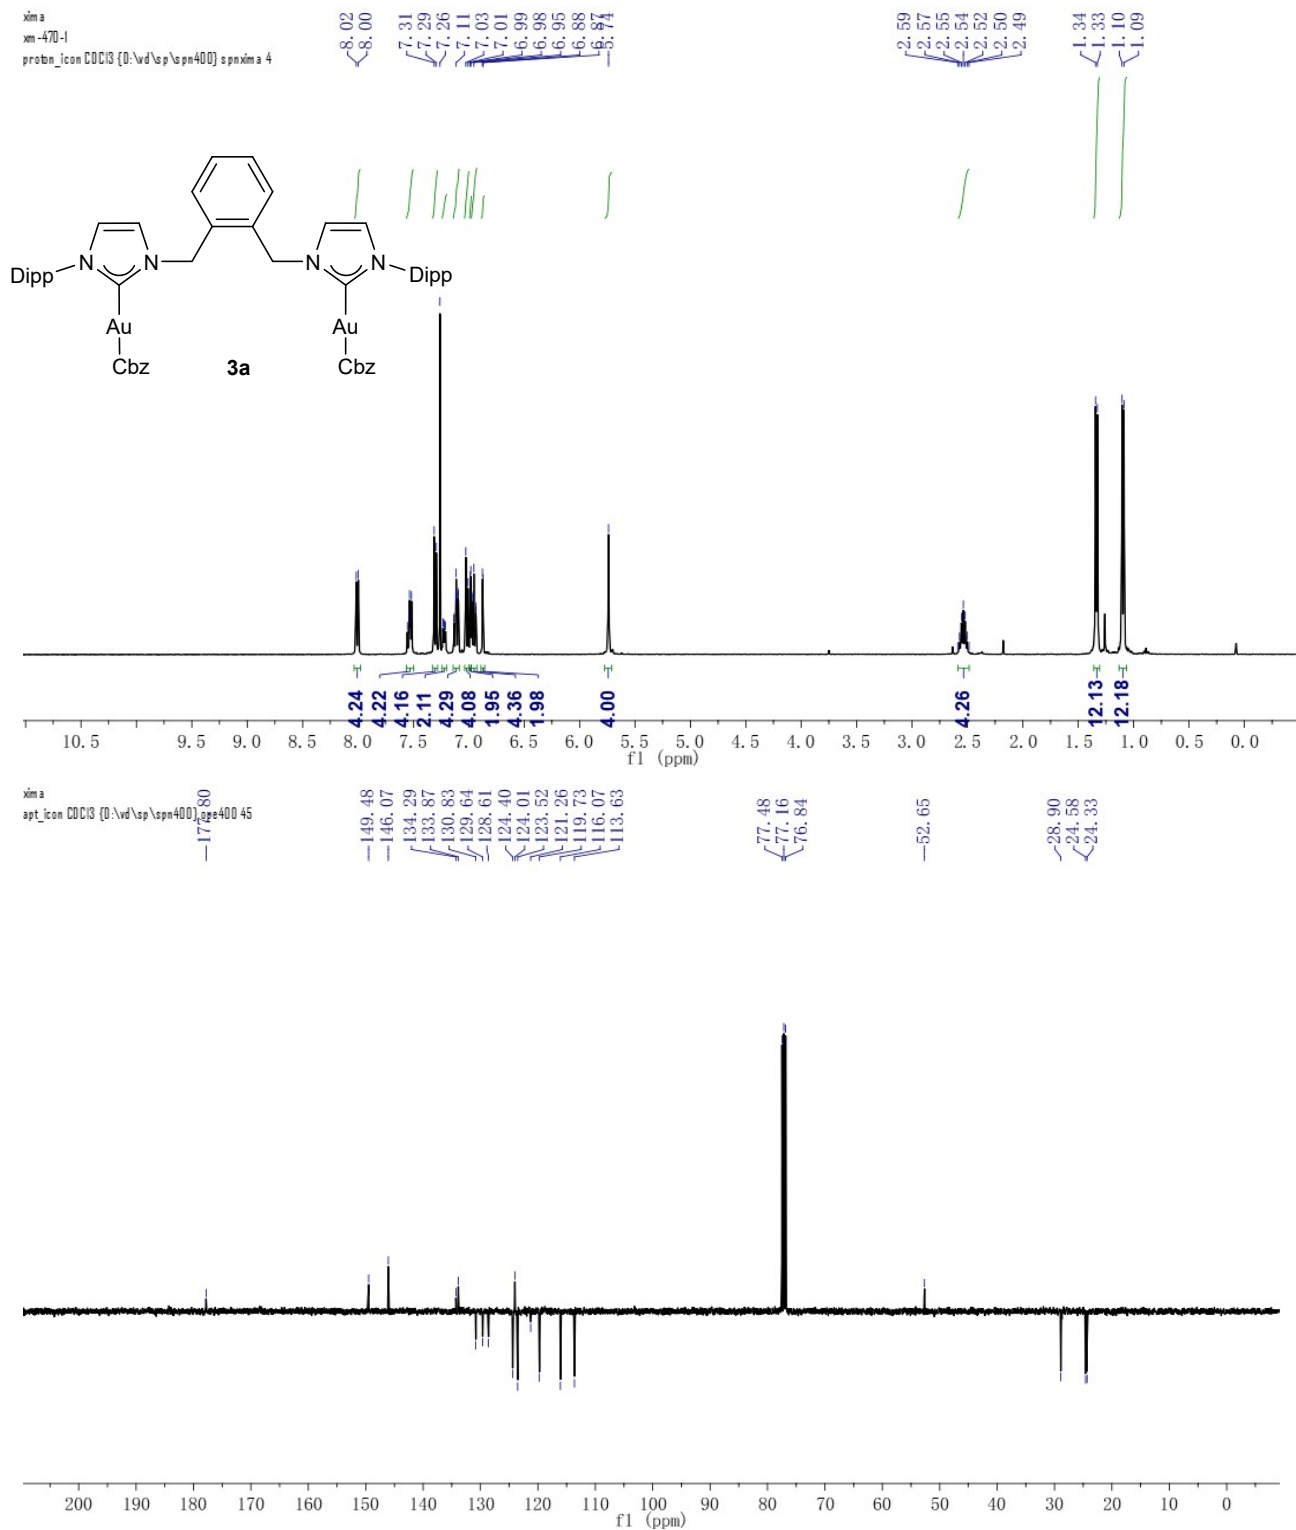

# SUPPORTING INFORMATION

## $^1\text{H}$ and $^{13}\text{C}$ $\{^1\text{H}\}$ apt NMR of $[\text{IPr}^{m\text{-aryl}}\{\text{Au}(\text{Cbz})\}_2]$ **3b**

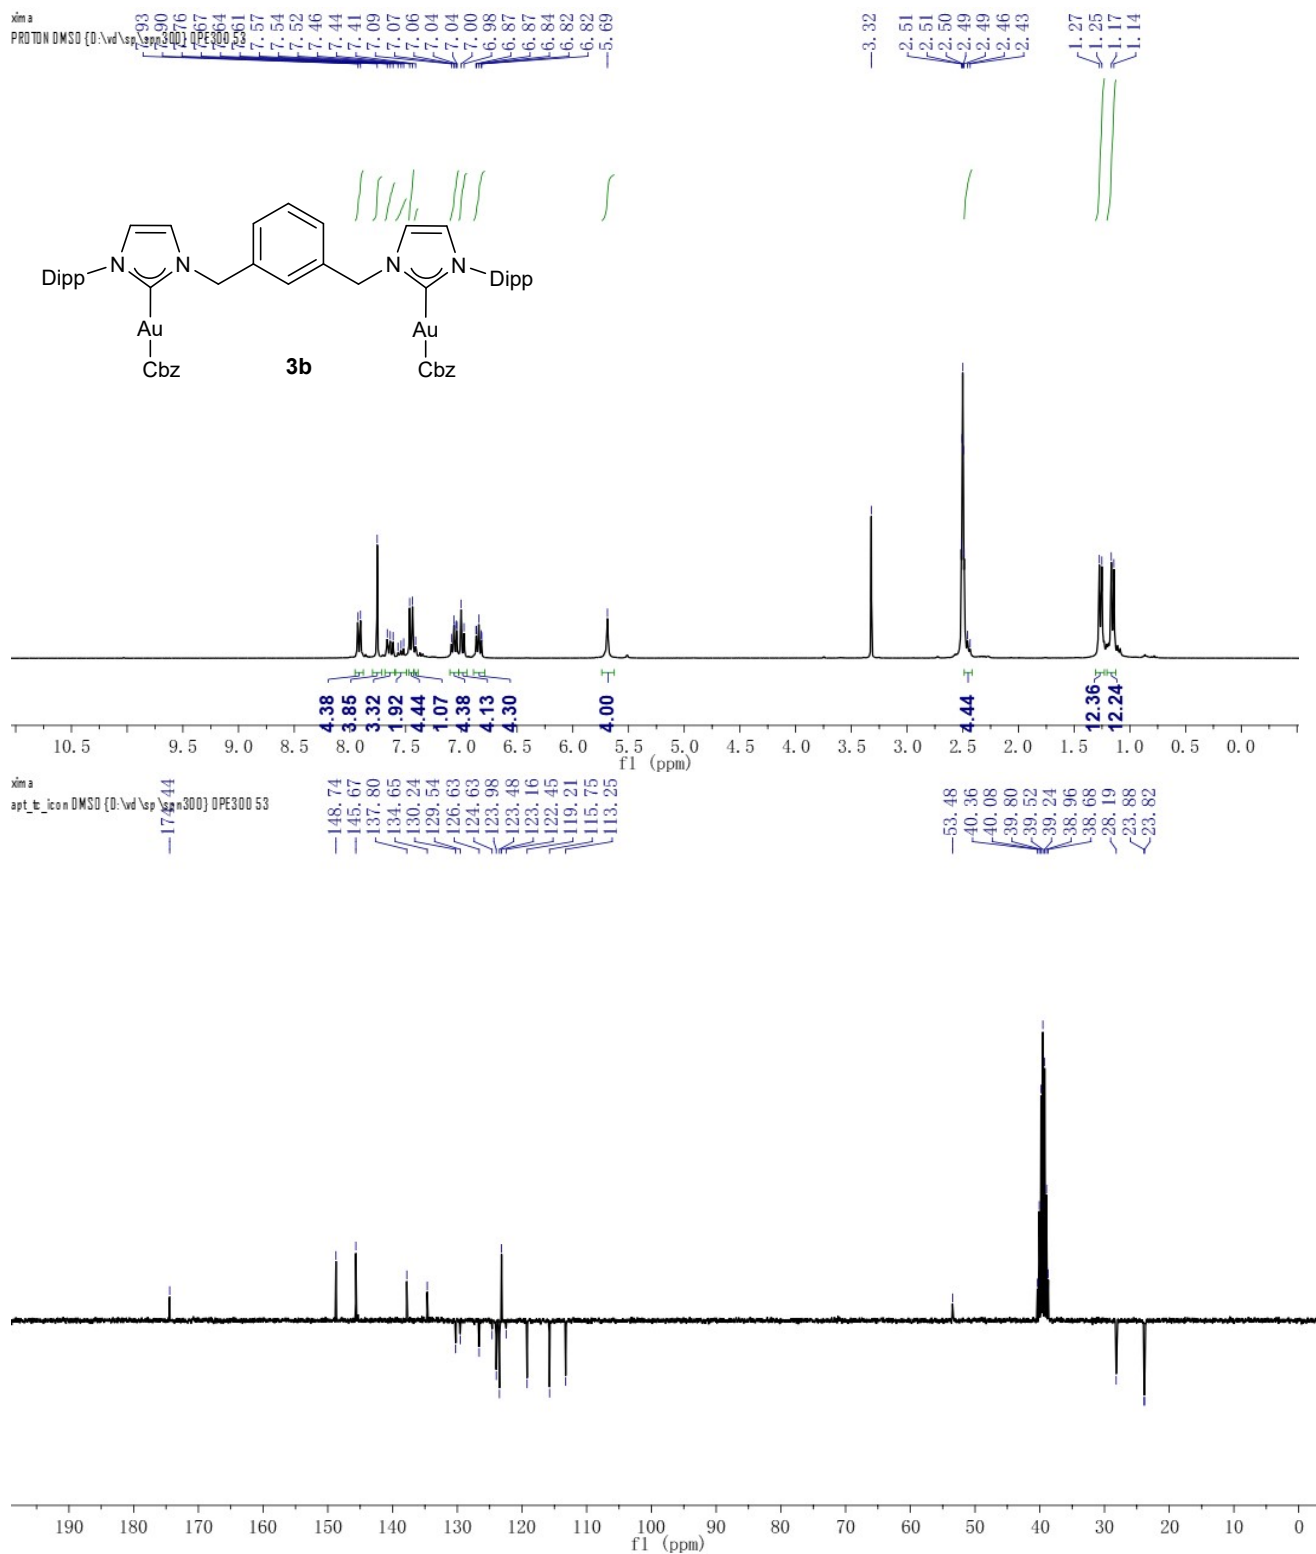

# SUPPORTING INFORMATION

## $^1\text{H}$ and $^{13}\text{C}$ $\{^1\text{H}\}$ NMR of $[\text{IMes}^{\text{o-aryl}}\{\text{Au}(\text{Cbz})\}_2]$ **3d**

xm a  
probn\_icon CDCl3 [D:\vd\sp\spn400] ope400 48

8.02  
8.00  
7.26  
7.14  
7.12  
7.12  
7.06  
7.04  
7.01  
6.97  
6.88  
6.88  
6.61  
6.60

-2.37  
-2.09  
-1.54

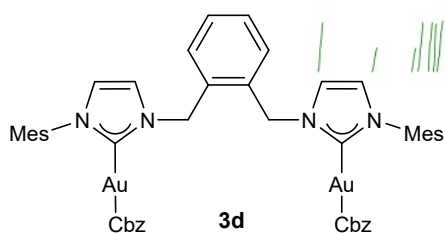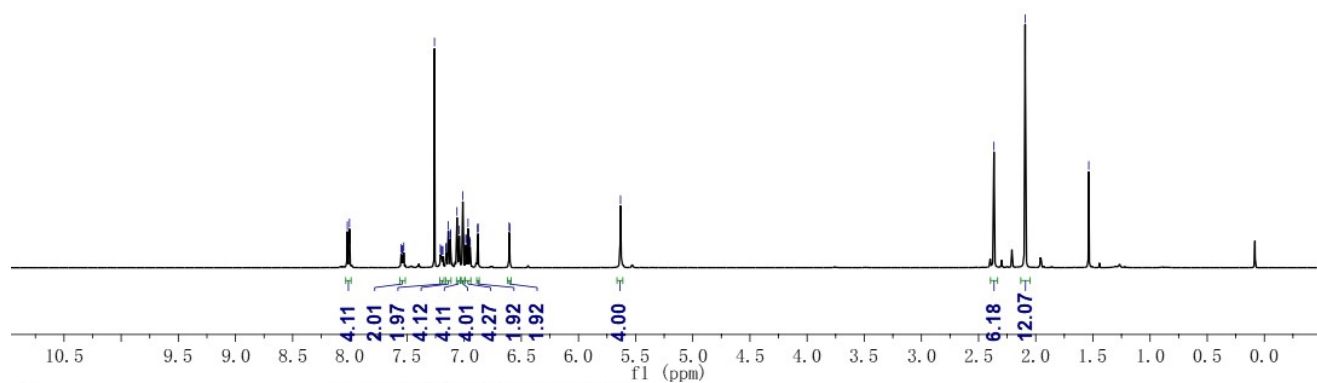

xm a  
C13\_icon CDCl3 [D:\vd\sp\spn400] ope400 48

149.47  
140.01  
135.03  
134.98  
133.96  
129.63  
129.52  
128.83  
124.04  
123.59  
122.89  
121.51  
119.75  
116.15  
113.70

77.48  
77.16  
76.84

-52.46

-21.27  
-18.21

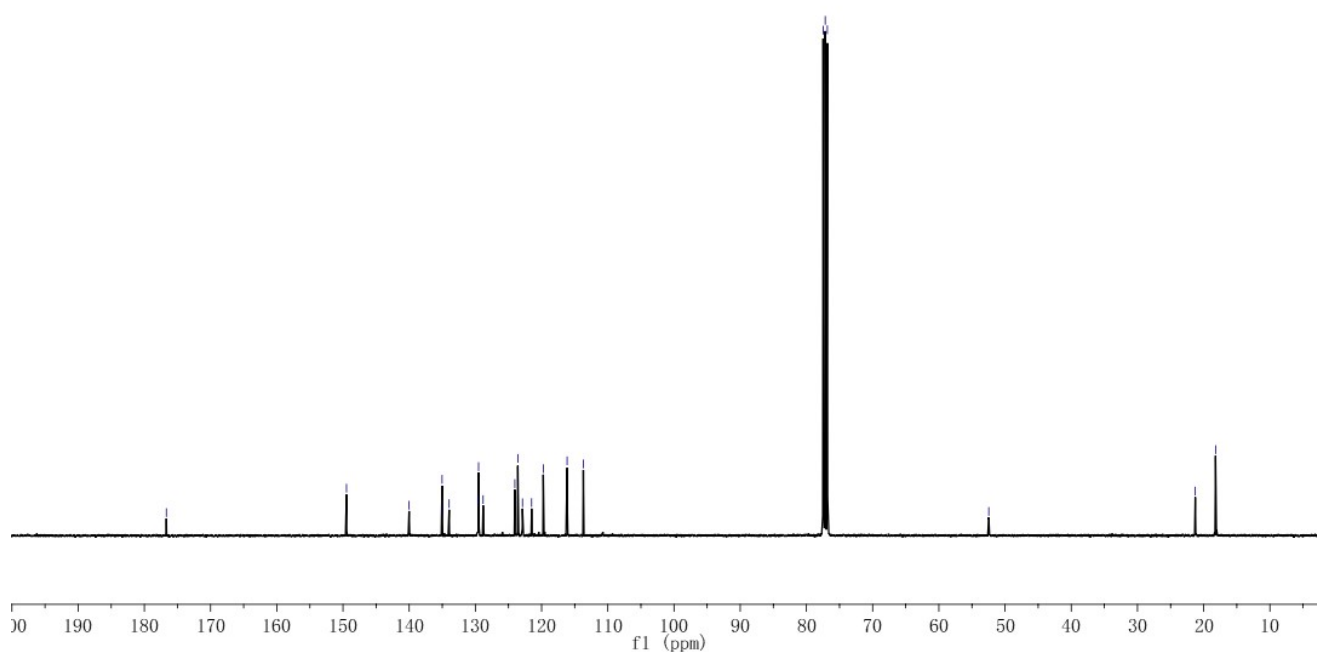



# SUPPORTING INFORMATION

## $^1\text{H}$ and $^{13}\text{C}$ $\{^1\text{H}\}$ apt NMR of $[\text{IMes}^{m\text{-aryl}}\{\text{Au}(\text{Cbz})\}_2]$ **3e**

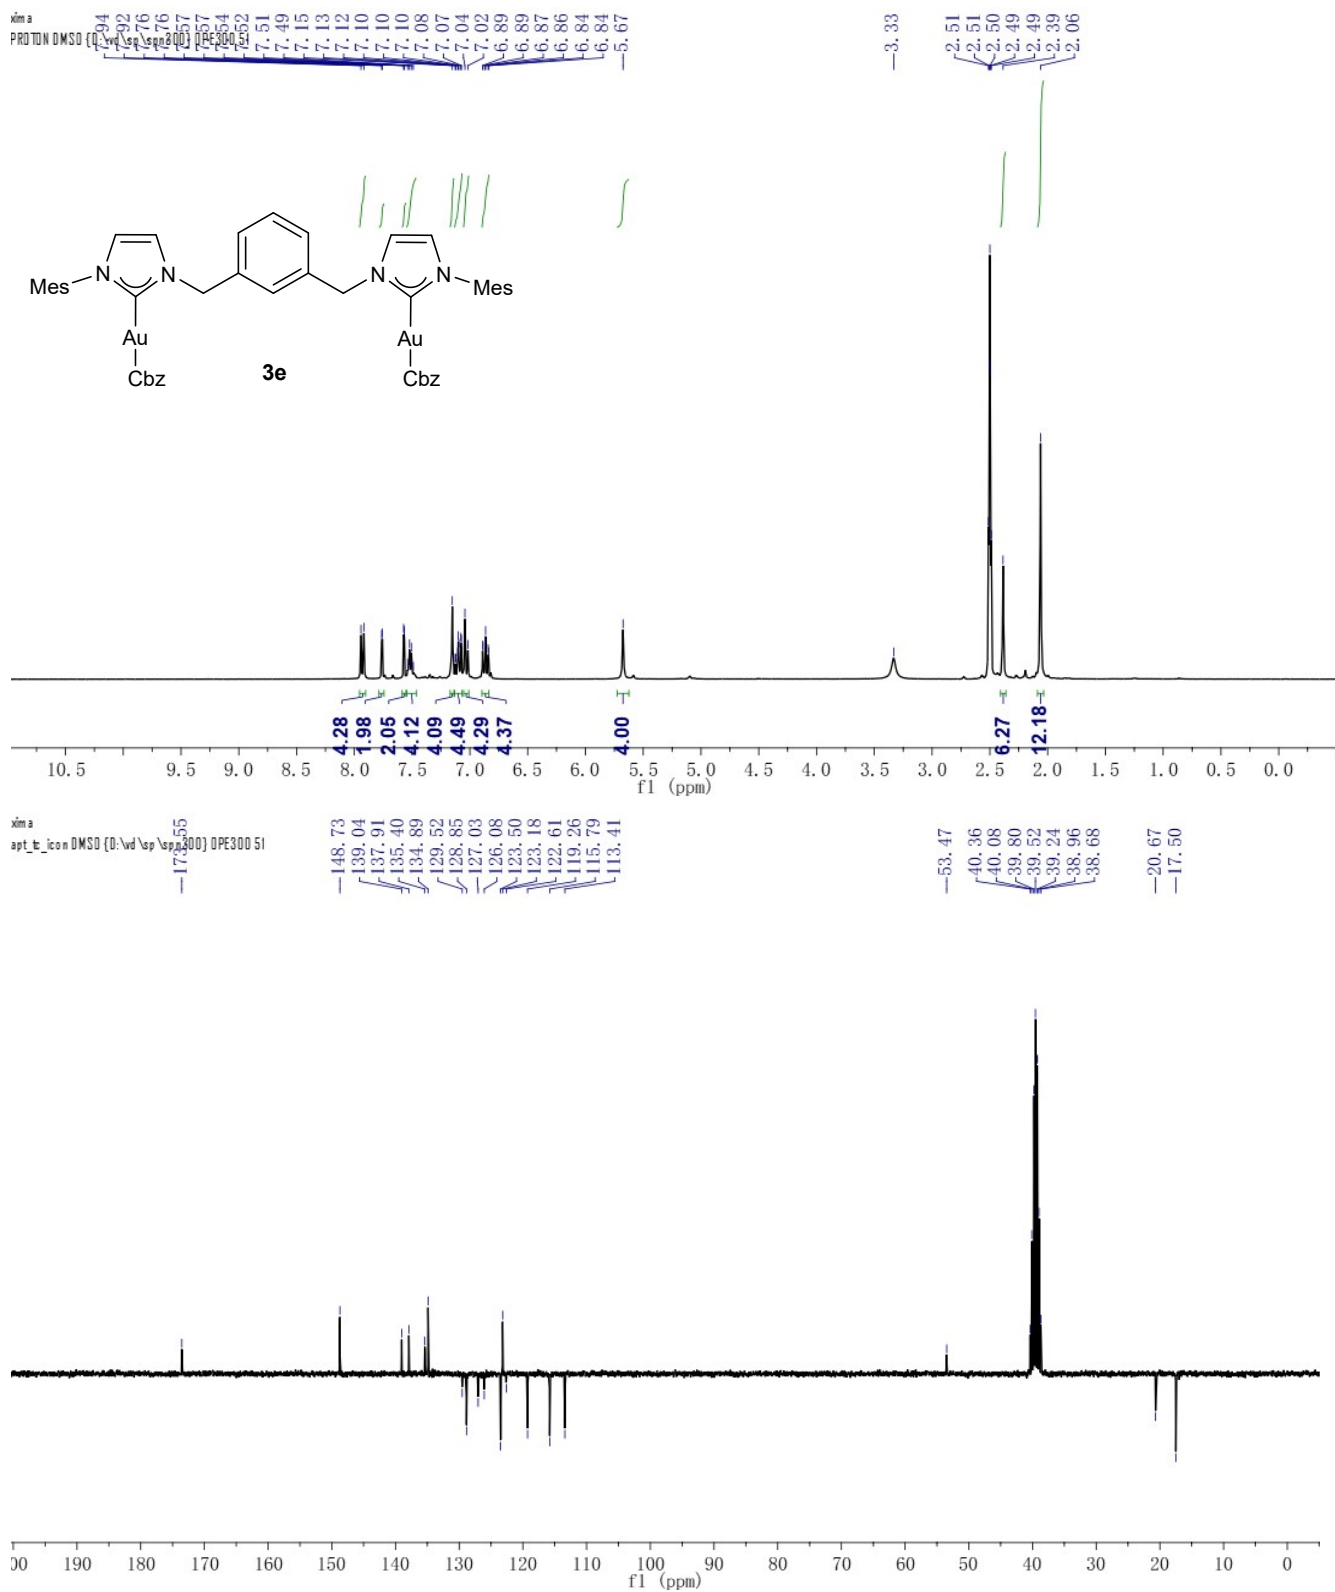

# SUPPORTING INFORMATION

## $^1\text{H}$ and $^{13}\text{C}$ $\{^1\text{H}\}$ apt NMR of $[\text{IMes-}p\text{-aryl}\{\text{Au}(\text{Cbz})\}_2]$ **3f**

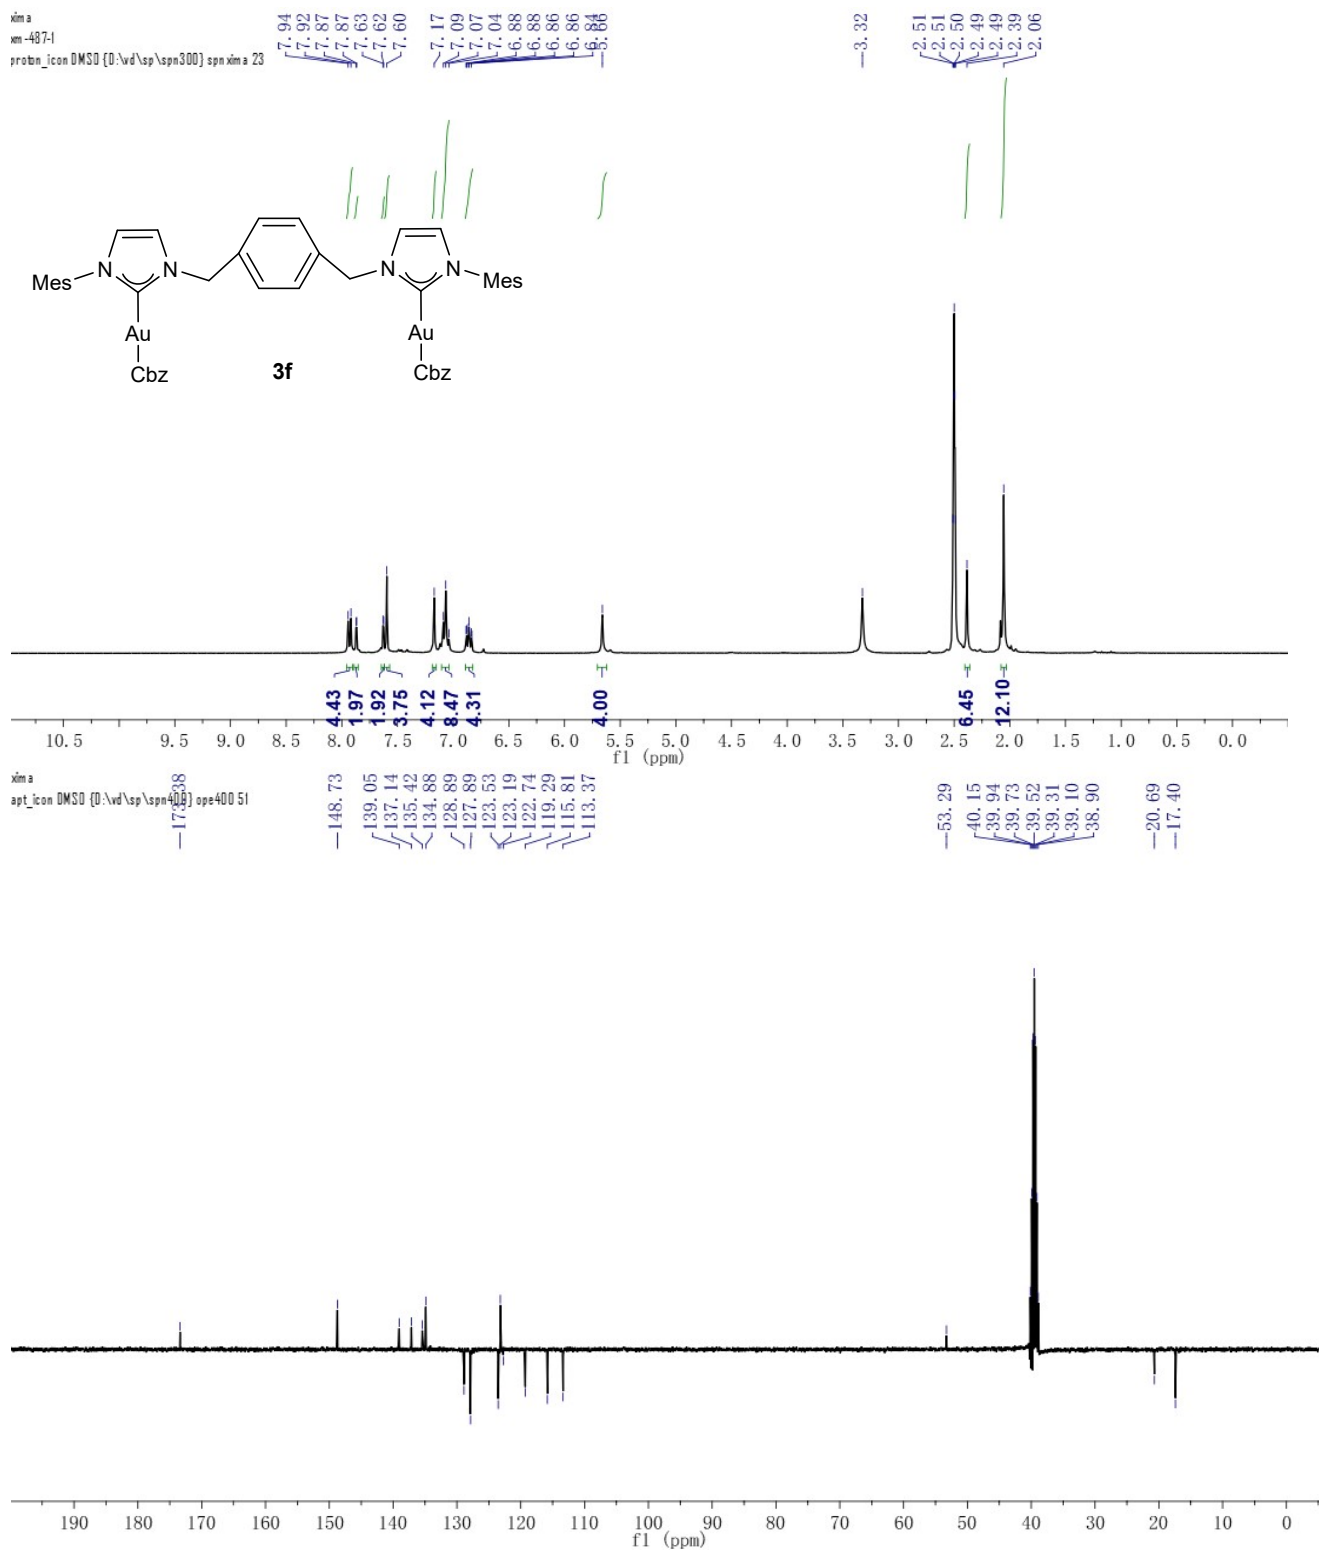

# SUPPORTING INFORMATION

## $^1\text{H}$ and $^{13}\text{C}$ $\{^1\text{H}\}$ apt NMR of $[\text{Ime}^{\text{o-aryl}}\{\text{Au}(\text{Cbz})\}_2]$ **3g**

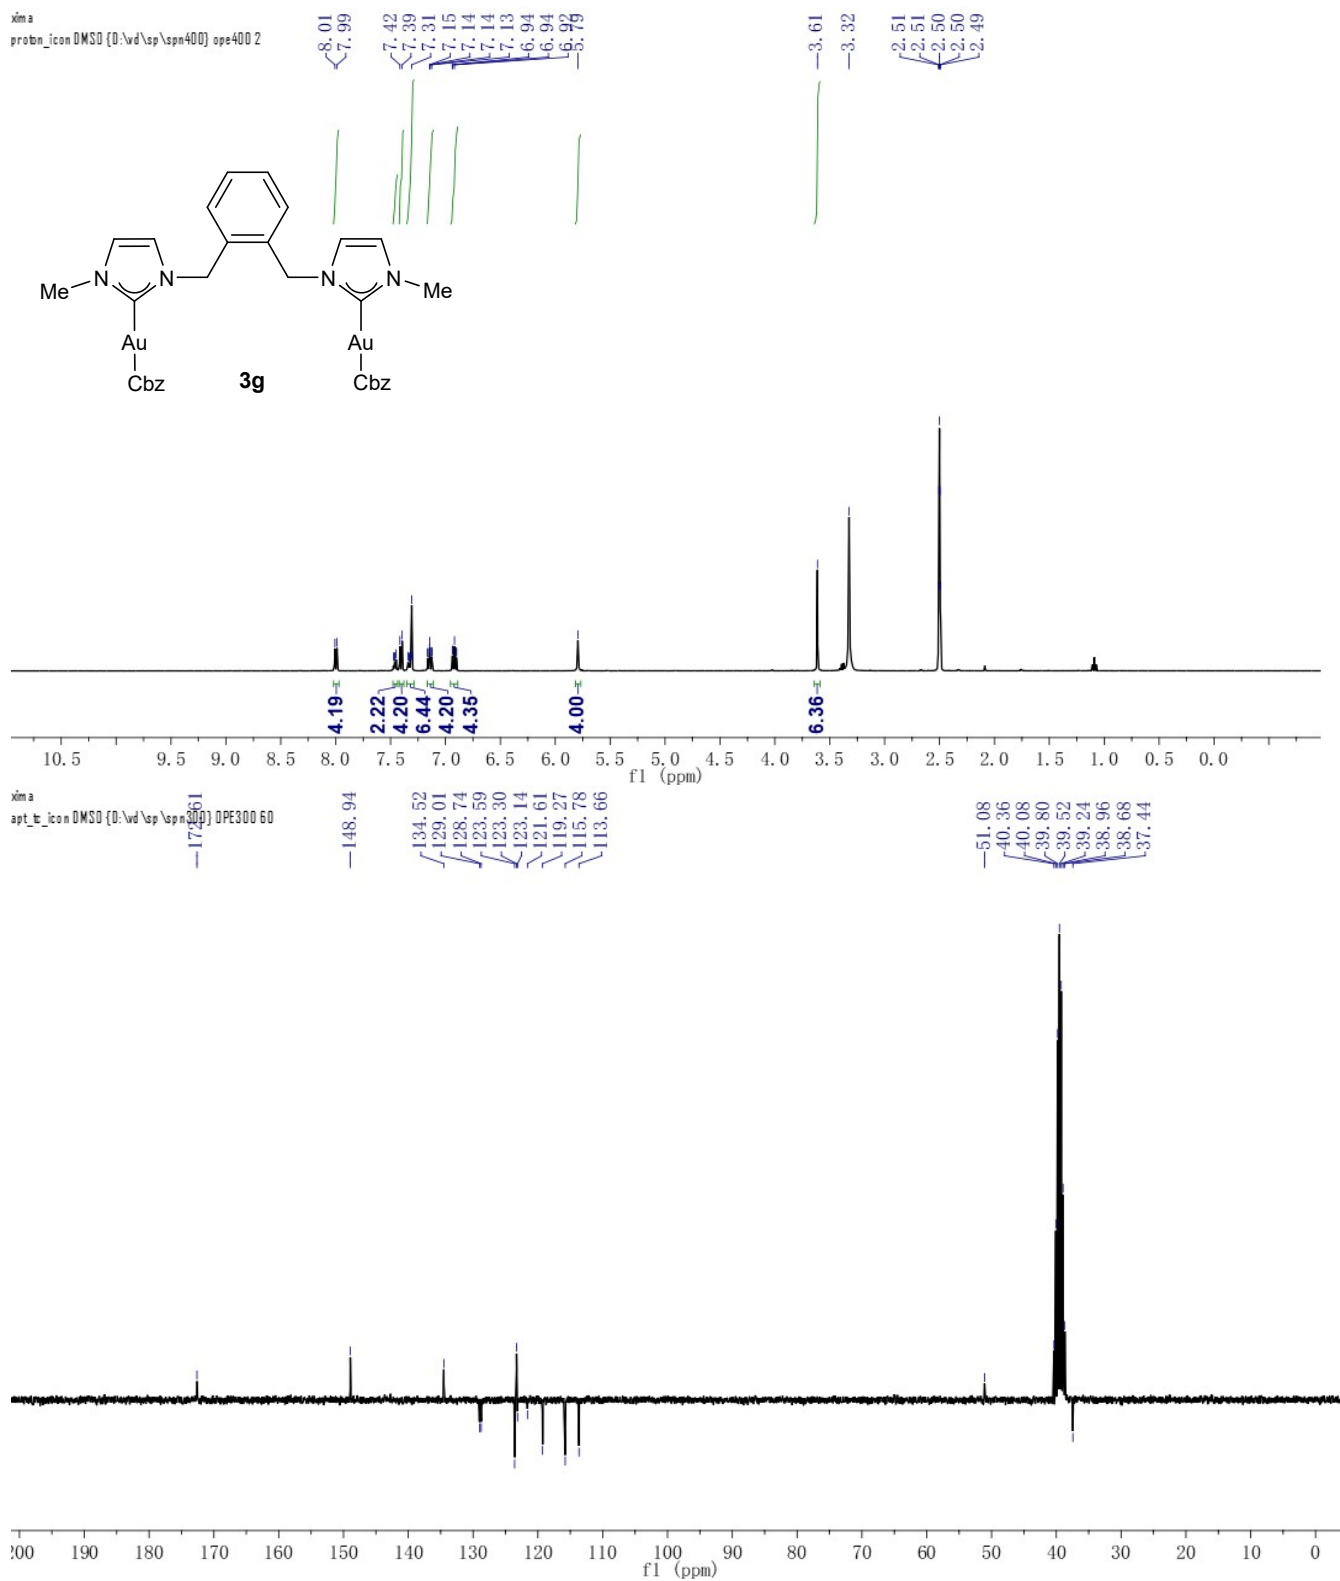

# SUPPORTING INFORMATION

## $^1\text{H}$ and $^{13}\text{C}$ $\{^1\text{H}\}$ apt NMR of $[(\text{IPr})^{\text{hexane-1,6-diyl}}\{\text{Au}(\text{Cbz})\}_2] \mathbf{3h}$

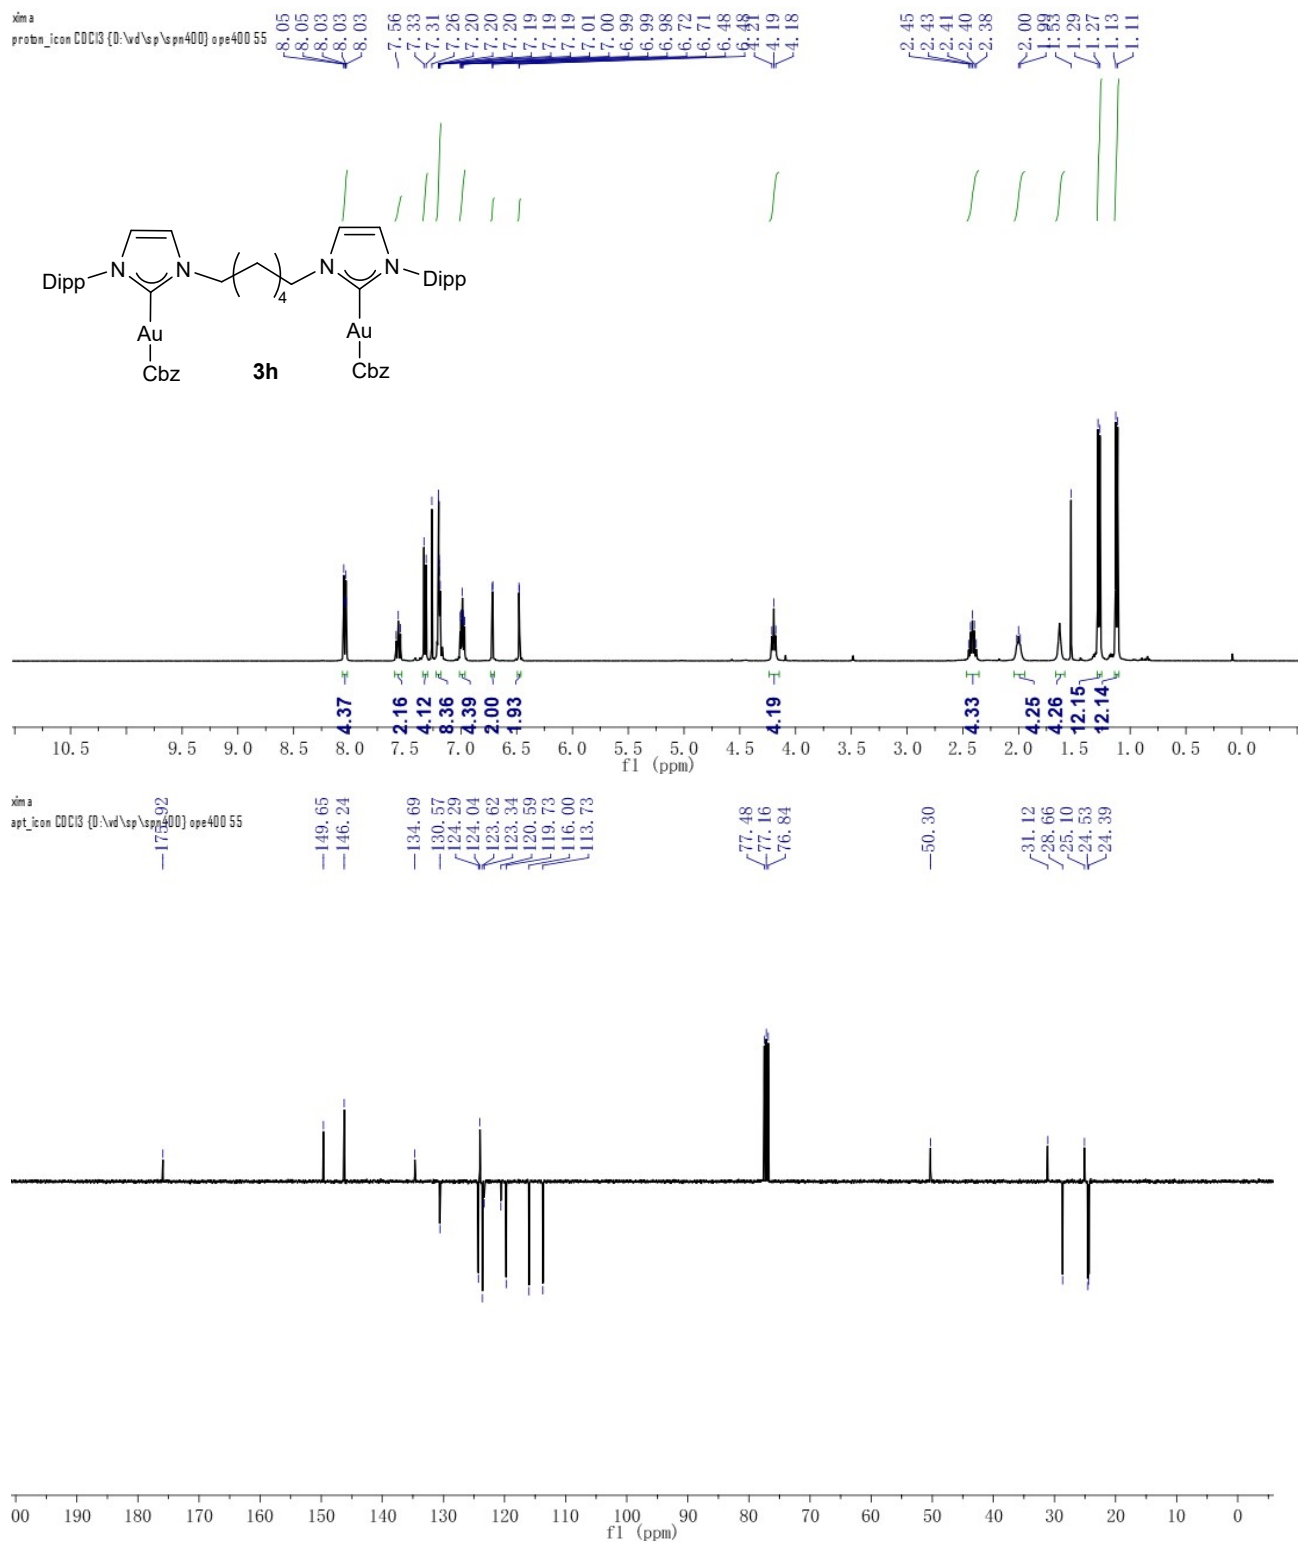

# SUPPORTING INFORMATION

## $^1\text{H}$ and $^{13}\text{C}$ $\{^1\text{H}\}$ apt NMR of $[\text{IPr}^{\text{o-aryl}}\{\text{Au}(1\text{H-benzimidazolato})\}_2]$ **4a**

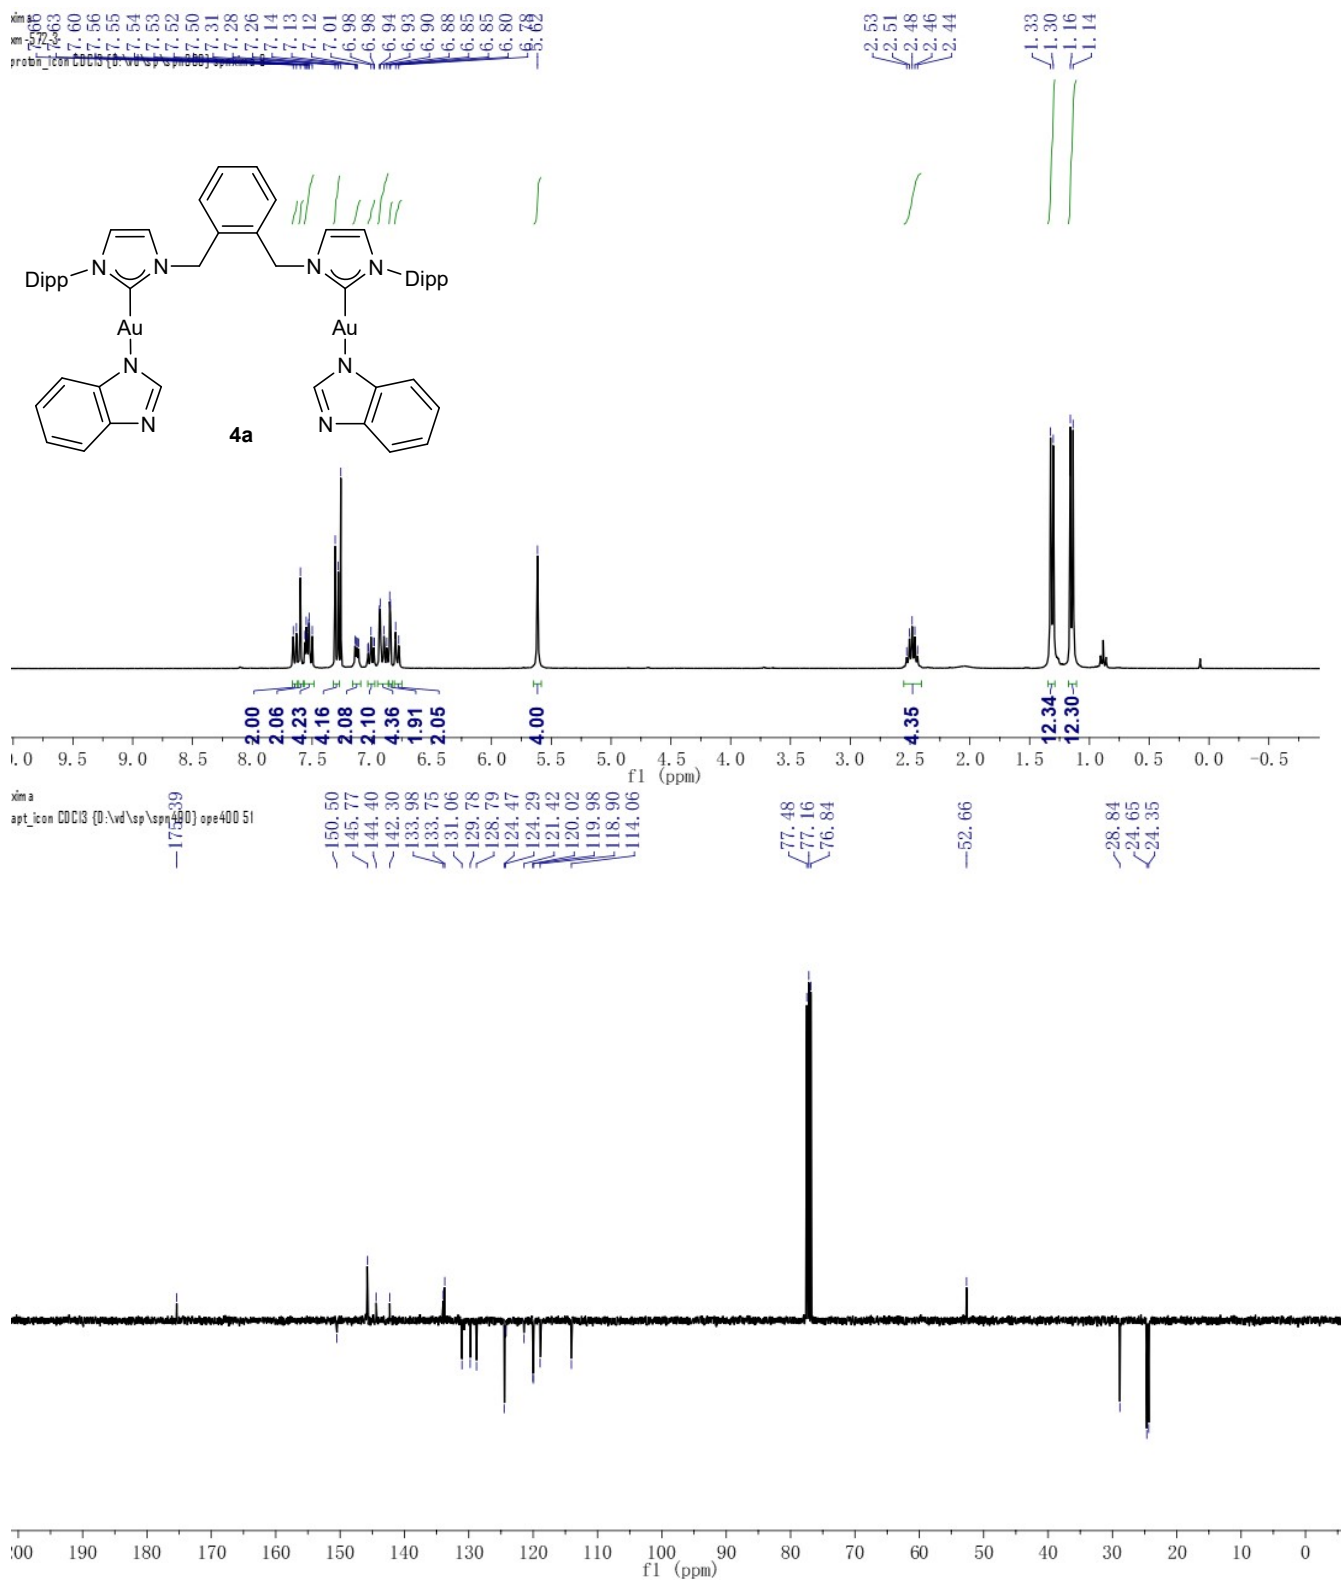

# SUPPORTING INFORMATION

## $^1\text{H}$ and $^{13}\text{C}$ $\{^1\text{H}\}$ apt NMR of $[\text{IP}^{\text{r-aryl}}\{\text{Au}(5,6\text{-dimethyl-1H-benzimidazolato})\}_2] \mathbf{4b}$

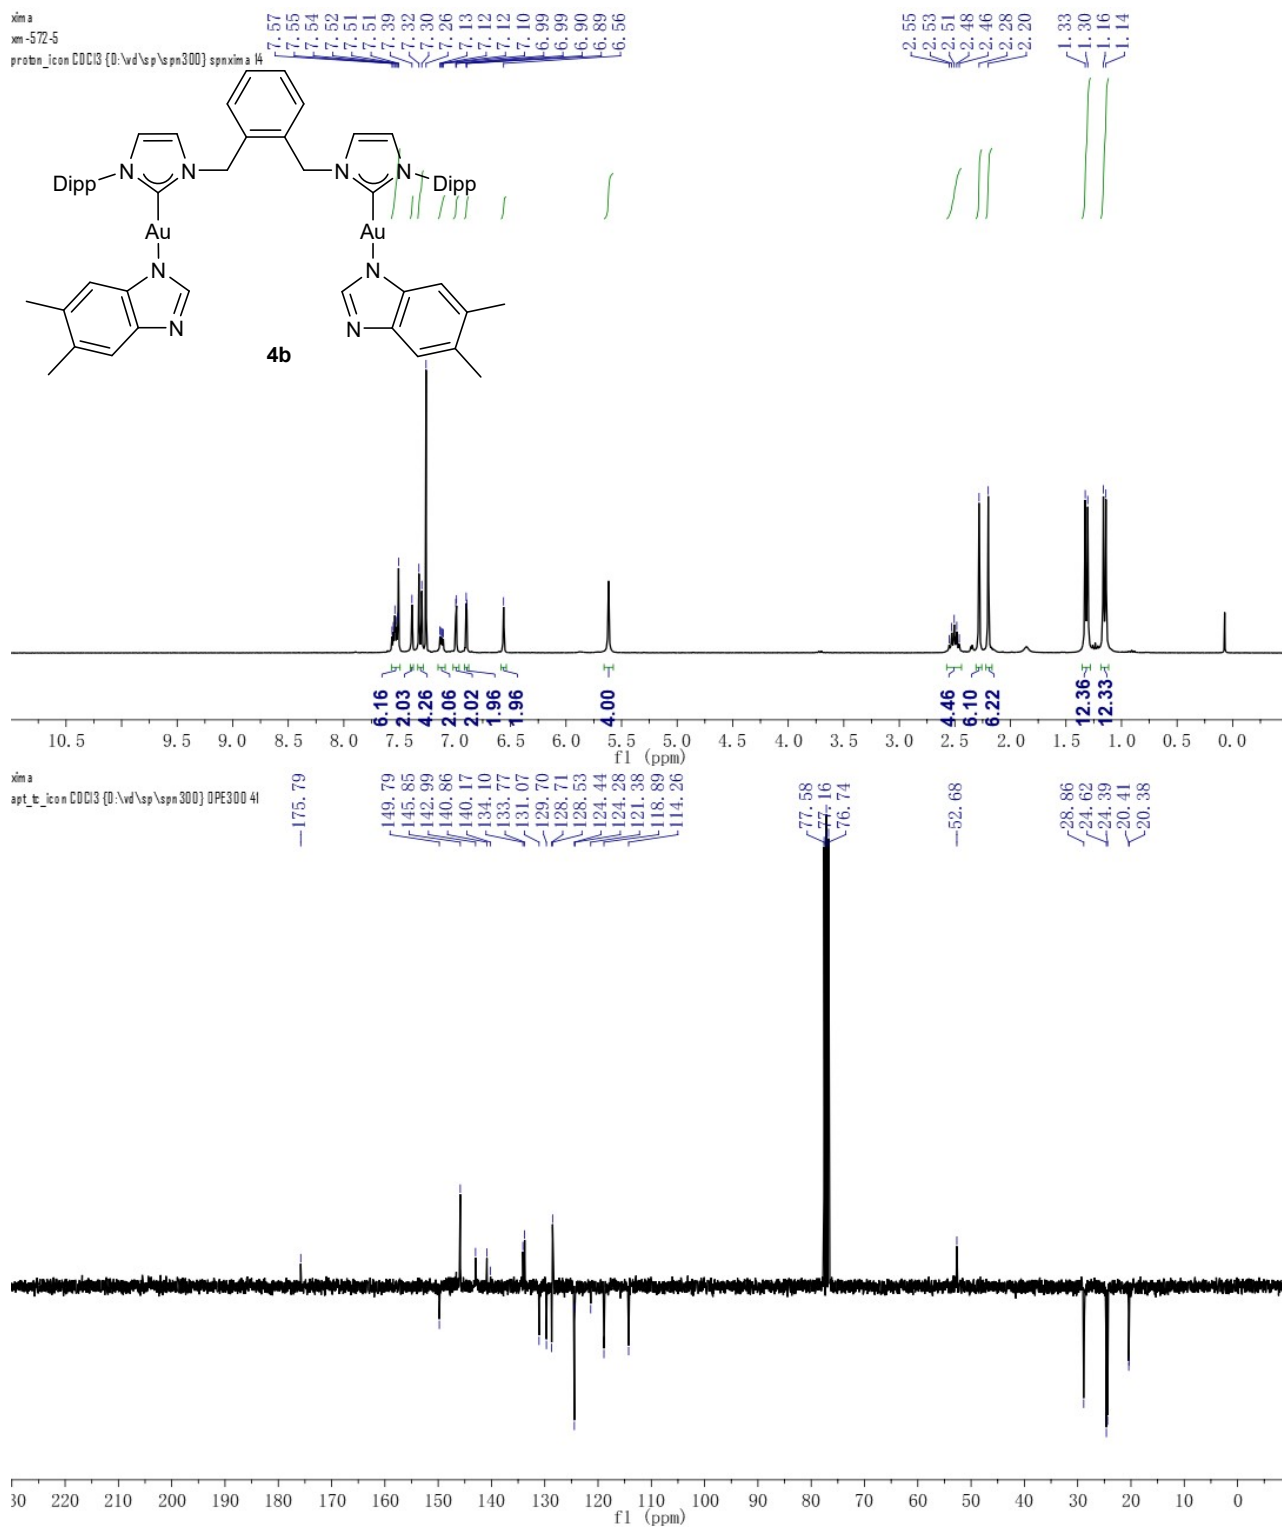

# SUPPORTING INFORMATION

## $^1\text{H}$ and $^{13}\text{C}$ $\{^1\text{H}\}$ apt NMR of $[(\text{IPr})^{\text{o-aryl}}\{\text{Au}(4,5\text{-diphenyl-1H-imidazolato})\}_2]_2$ **4c**

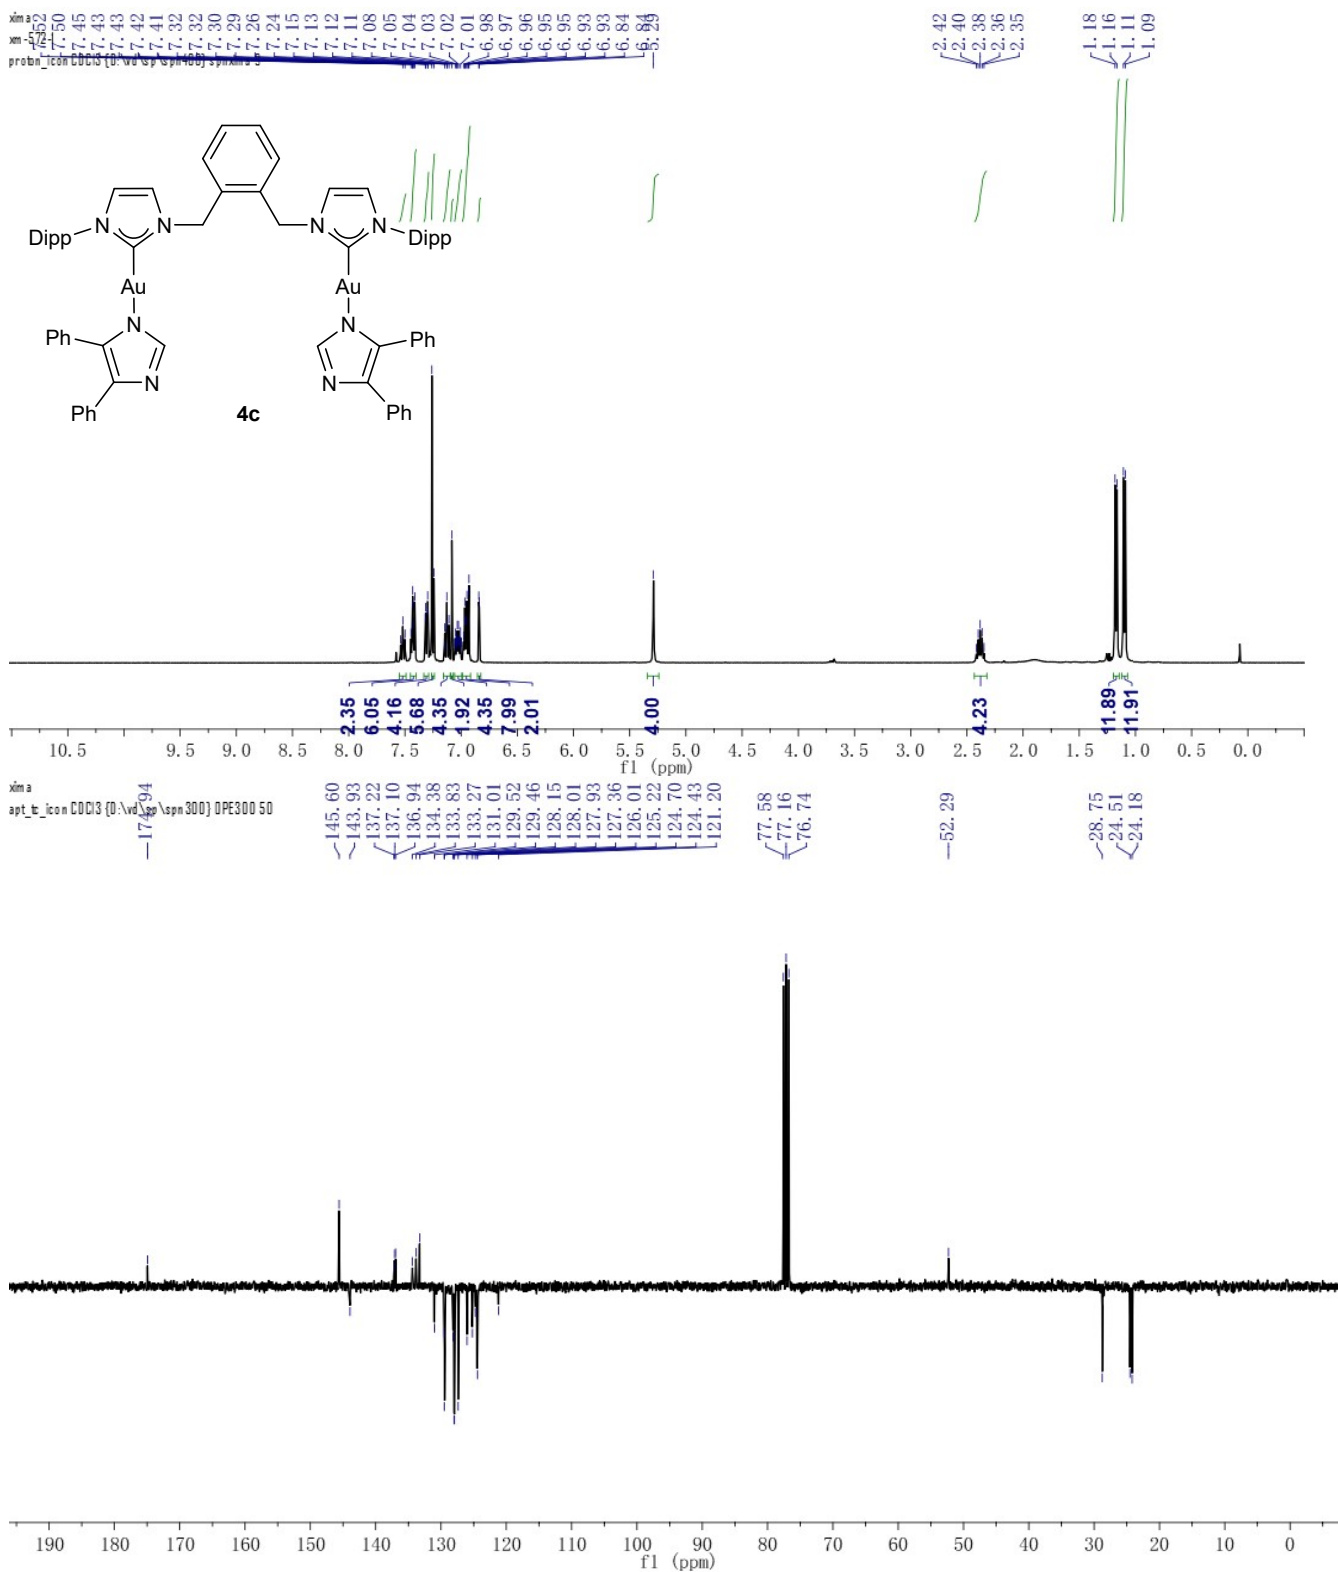

# SUPPORTING INFORMATION

**<sup>1</sup>H and <sup>13</sup>C {<sup>1</sup>H} NMR of Diethyl 2-((1H-indol-3-yl)methyl)-2-(3-methylbut-2-en-1-yl)malonate **6****

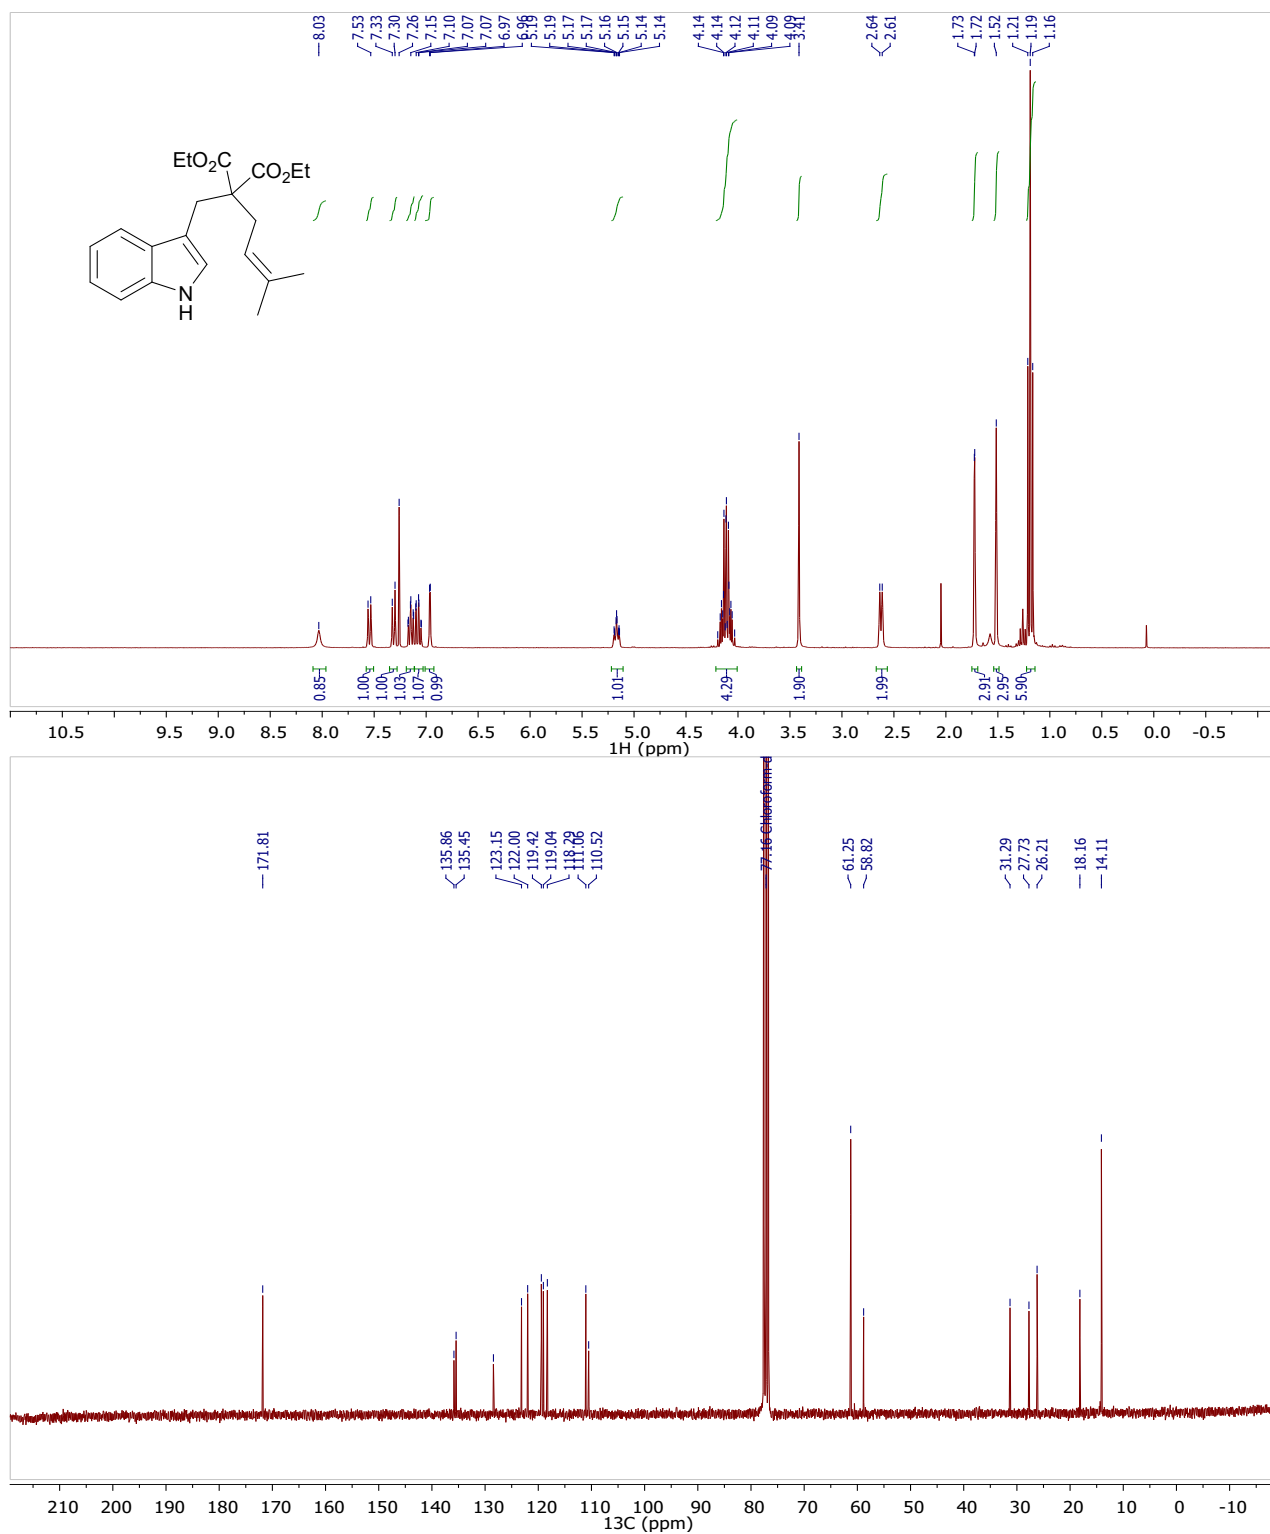



# SUPPORTING INFORMATION

## $^1\text{H}$ and $^{13}\text{C}$ $\{^1\text{H}\}$ apt NMR of Diethyl (3aS\*,4aS\*,9bS\*)-3a,4,4a,5-tetrahydro-1H-cyclopenta[2,3]cyclobuta[1,2-b]indole-2,2(3H)-dicarboxylate **7**

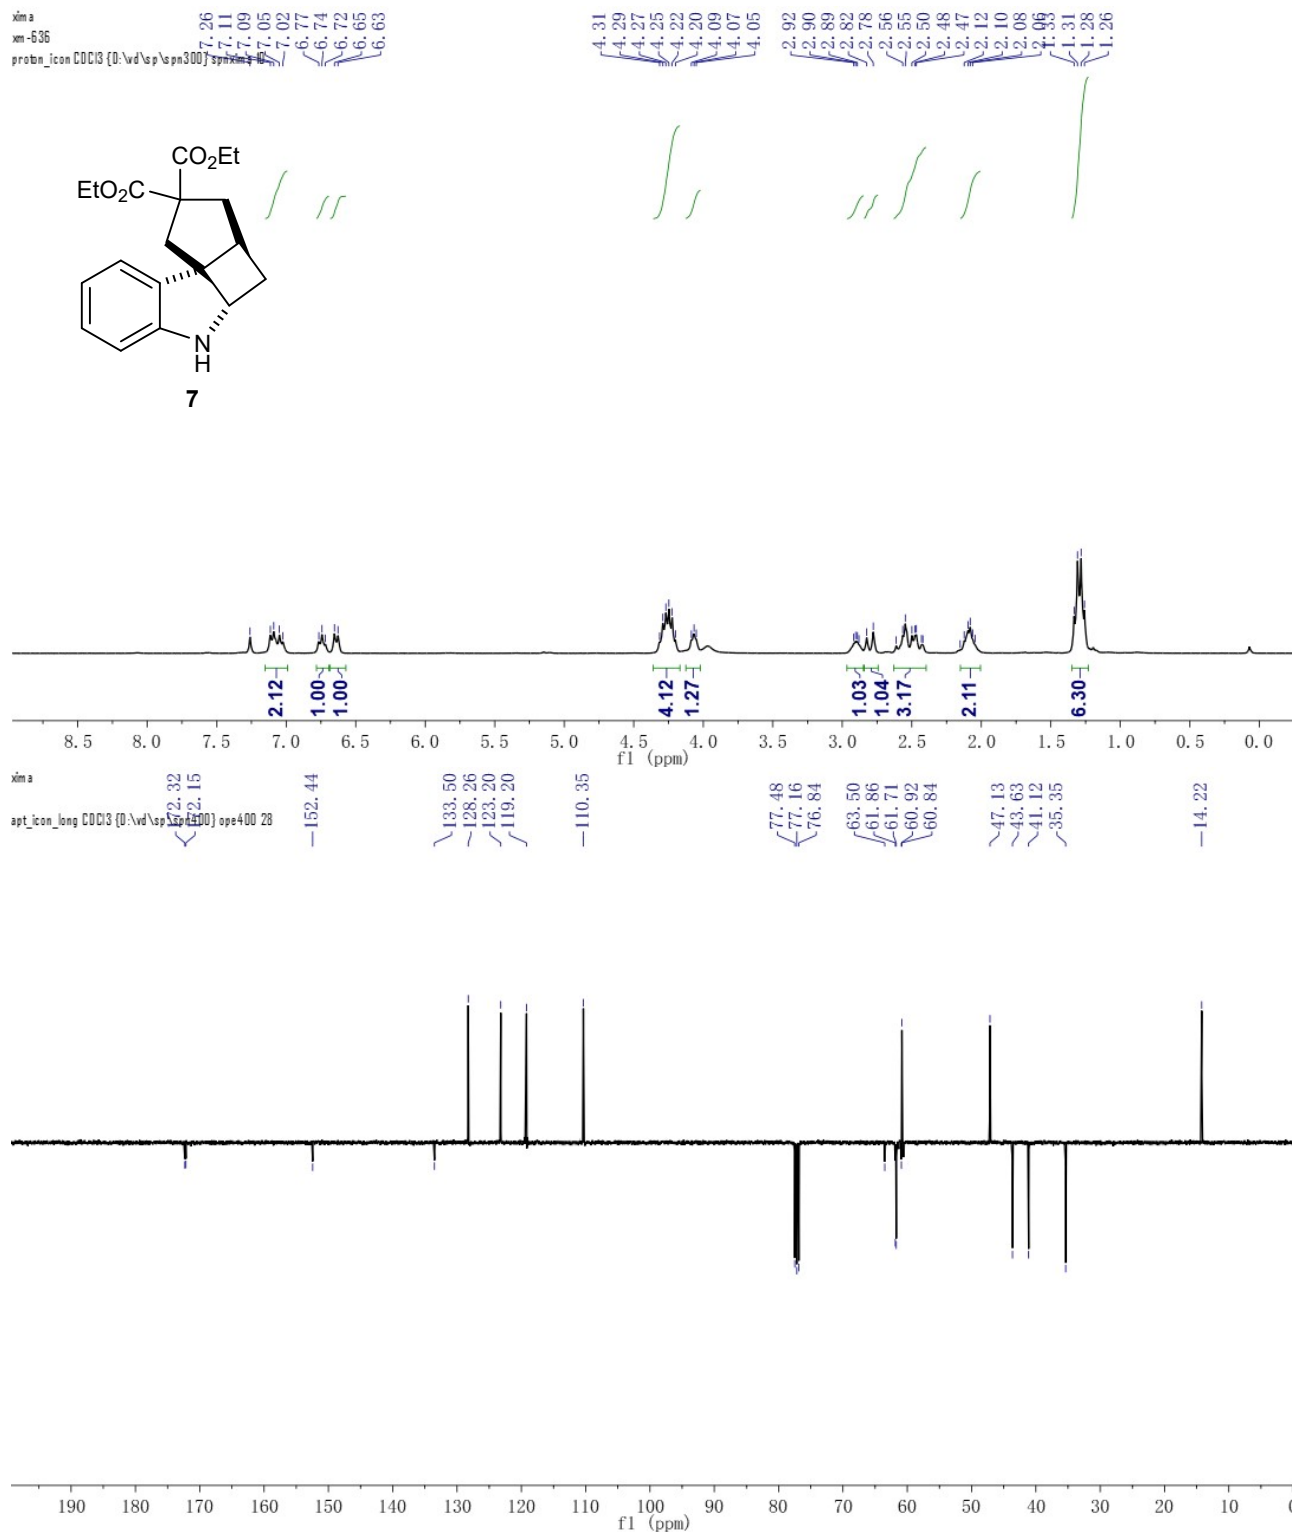

# SUPPORTING INFORMATION

## $^1\text{H}$ and $^{13}\text{C}$ $\{^1\text{H}\}$ apt NMR of Diethyl 6,6-dimethyl-6,7,8,10-tetrahydrocyclohepta[b]indole-9,9(5H)-dicarboxylate **8**

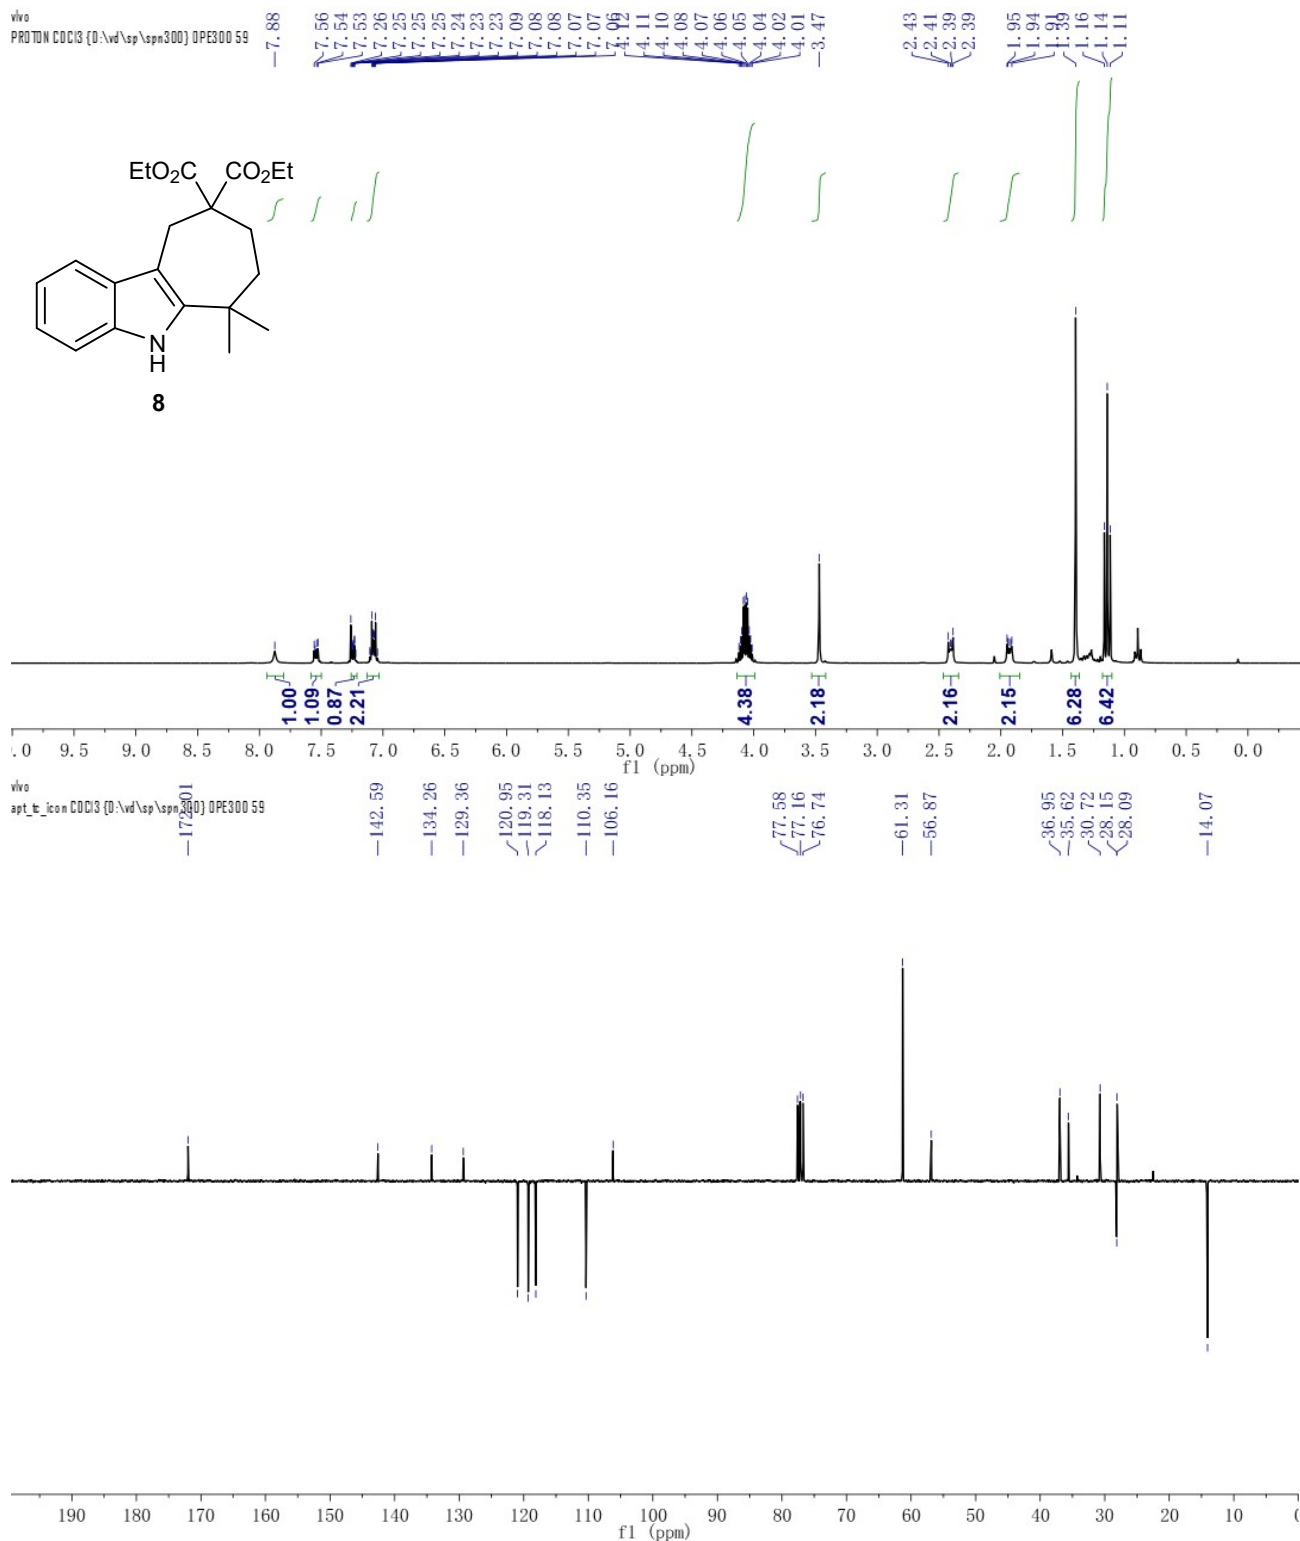

## SUPPORTING INFORMATION

---

### References

1. (a) Zhang, H.; Liu, J.; Chen, J.; Zhao, J.; Zhao, Y.; Li, L., *Synthesis* **2003**, 2661–2666; (b) Brill, M.; Collado, A.; Cordes, D. B.; Slawin, A. M. Z.; Vogt, M.; Grützmacher, H.; Nolan, S. P., *Organometallics* **2014**, *34*, 263–274.
2. Bayrakdar, T. A. C. A.; Nahra, F.; Davis, J. V.; Gamage, M. M.; Captain, B.; Temprado, M.; Marazzi, M.; Saab, M.; Hecke, K. V.; Ormerod, D.; Hoff, C. D. and Nolan, S. P. *Organometallics* **2020**, *39*, 2907–2916.
3. Crosby, G. A.; Demas, J. N., *Review. J. Phys. Chem.* **1971**, *75*, 991-1024.
4. Suzuki, K., Kobayashi, A., Kaneko, S., Takehira, K., Yoshihara, T., Ishida, H., Shiina, Y., Oishi, S. and Tobita, S., *Phys. Chem. Chem. Phys.* **2009**, *11*, 9850–9860.
5. Tulloch, A. A. D.; Danopoulos, A. A.; Winston, S.; Kleinhenz, S. and Eastham, G. J. *Chem. Soc., Dalton Trans.* **2000**, 4499–4506.
6. Liu, J.; Zhao, Y.; Zhou, Y.; Li, L.; Zhang, T. Y. and H. Zhang. *Org. Biomol. Chem.* **2003**, *1*, 3227–3231.
7. Du, Y.; Tang, H.; Ding, H.; Shi, Y.; Cao, C. and Pang, G. *J. Chem. Res.* **2016**, *40*, 735–739.
8. Beillard, A.; Golliard, E.; Gillet, V.; Bantreil, X.; Métro, T.-X.; Martinez, J. and Lamaty, F. *Chem. Eur. J.* **2015**, *21*, 17614 – 17617.
9. Martynova, E. A.; Voloshkin, V. A.; Guillet, S. G.; Bru, F.; Beliš, M.; Hecke, K. V.; Cazin, C. S. J. and Nolan, S. P. *Chem. Sci.* **2022**, *13*, 6852–6857.
